# Supplementary material for: Taxonomic and Functional Dynamics of Bacterial Communities During Drift Seaweed Vermicomposting
Source: MDPI journal article supplement (doi:10.3390/microorganisms13010030), 2024-12-27
Supplement: s1 [file s1]

## Sheet: Supplementary Table S1
Supplementary Table S1. Differential abundance in bacterial phyla during vermicomposting of seaweeds analyzed using negative binomial models as implemented in the package DESeq2 (Love et al., 2014)
Positive log2FoldChange imply increase in the second vs the first day in comparison column
baseMean	log2FoldChange	lfcSE	stat	pvalue	padj	padj	Phylum	Comparison
8005.75	1.57466	0.240171	6.55643	5.51111e-11	2.48e-10	5.952e-10	Bacteroidota	0 days vs 7 days
1350.35	-1.76068	0.275114	-6.39984	1.55543e-10	5.99953e-10	1.52715e-09	Planctomycetota	0 days vs 7 days
3877.04	2.0916	0.298653	7.00344	2.49756e-12	2.2478e-11	4.49561e-11	Verrucomicrobiota	0 days vs 7 days
85.5115	1.38761	0.322314	4.30515	1.66871e-05	5.00614e-05	7.8357e-05	Myxococcota	0 days vs 7 days
10559	1.0752	0.307223	3.49972	0.000465742	0.00114319	0.00167667	Pseudomonadota	0 days vs 7 days
166.998	-2.8422	0.582054	-4.88306	1.04452e-06	3.52526e-06	6.63579e-06	Cyanobacteriota	0 days vs 7 days
82.8942	-6.0422	1.46699	-4.11878	3.80885e-05	0.000102839	0.000171398	Campylobacterota	0 days vs 7 days
88.1	8.48632	0.950875	8.92475	4.46697e-19	6.0304e-18	1.60811e-17	Bdellovibrionota	0 days vs 7 days
181.033	-1.75758	0.769873	-2.28294	0.0224337	0.0378569	0.0494457	Chloroflexota	0 days vs 7 days
578.494	-0.951305	0.375926	-2.53056	0.0113879	0.0204983	0.0267369	Actinomycetota	0 days vs 7 days
21.4479	3.29783	1.22563	2.69073	0.00712958	0.0137499	0.0192499	Patescibacteria	0 days vs 7 days
1451	-6.37581	0.710684	-8.97136	2.92863e-19	6.0304e-18	1.58146e-17	Bacillota	0 days vs 7 days
115.928	9.04333	1.33729	6.76244	1.35684e-11	9.15867e-11	2.09341e-10	Abditibacteriota	0 days vs 7 days
60.6377	-9.08764	3.36323	-2.70205	0.00689127	0.0137499	0.0190835	Fusobacteriota	0 days vs 7 days
6.61307	-5.89163	2.1726	-2.71179	0.00669219	0.0137499	0.0190835	Deinococcota	0 days vs 7 days
325.508	6.88786	1.04914	6.56525	5.19446e-11	2.48e-10	5.952e-10	Acidobacteriota	0 days vs 7 days
8005.75	-0.55537	0.239923	-2.31479	0.0206246	0.0412492	0.0464054	Bacteroidota	7 days vs 14 days
1350.35	1.27425	0.274876	4.63573	3.55681e-06	3.08257e-05	1.92068e-05	Planctomycetota	7 days vs 14 days
85.5115	-1.49487	0.311574	-4.7978	1.60422e-06	2.08548e-05	9.62531e-06	Myxococcota	7 days vs 14 days
10559	-1.55412	0.30719	-5.05915	4.21125e-07	1.09492e-05	2.84259e-06	Pseudomonadota	7 days vs 14 days
82.8942	3.80941	1.46824	2.59455	0.00947153	0.0238817	0.0239604	Campylobacterota	7 days vs 14 days
88.1	-0.77426	0.27838	-2.78131	0.00541404	0.0175956	0.0171975	Bdellovibrionota	7 days vs 14 days
9.45225	3.20528	1.2461	2.57226	0.0101038	0.0238817	0.0248003	Hydrogenedentes	7 days vs 14 days
181.033	2.56657	0.764623	3.35665	0.000788942	0.00293036	0.00274857	Chloroflexota	7 days vs 14 days
578.494	0.877858	0.37495	2.34127	0.0192185	0.0412492	0.0441616	Actinomycetota	7 days vs 14 days
28.5875	2.39747	0.904514	2.65056	0.00803594	0.0232149	0.0211679	Gemmatimonadota	7 days vs 14 days
1451	2.64424	0.711227	3.71785	0.000200924	0.000870671	0.000774993	Bacillota	7 days vs 14 days
34.0264	3.42719	0.838647	4.08657	4.37796e-05	0.000263742	0.000189128	Nitrospirota	7 days vs 14 days
325.508	2.10801	0.520202	4.05229	5.07196e-05	0.000263742	0.000210681	Acidobacteriota	7 days vs 14 days
8005.75	-2.15655	0.23987	-8.99047	2.46172e-19	6.64665e-18	1.58146e-17	Bacteroidota	14 days vs 21 days
3877.04	-2.21487	0.297709	-7.43972	1.00899e-13	9.08093e-13	2.17942e-12	Verrucomicrobiota	14 days vs 21 days
85.5115	0.765476	0.298729	2.56244	0.0103938	0.0155907	0.0249452	Myxococcota	14 days vs 21 days
6.71101	-8.73642	1.86622	-4.68135	2.84991e-06	8.54972e-06	1.61995e-05	Thermodesulfobacteriota	14 days vs 21 days
10559	-1.93352	0.307209	-6.29382	3.09748e-10	1.67264e-09	2.78773e-09	Pseudomonadota	14 days vs 21 days
166.998	-2.10543	0.570132	-3.69287	0.000221733	0.000460523	0.000825765	Cyanobacteriota	14 days vs 21 days
2.34981	5.30123	1.18064	4.49014	7.11763e-06	1.82668e-05	3.65335e-05	Fibrobacterota	14 days vs 21 days
82.8942	-10.1438	1.65043	-6.14614	7.93913e-10	3.57261e-09	6.59558e-09	Campylobacterota	14 days vs 21 days
88.1	0.713768	0.261373	2.73084	0.00631727	0.0113711	0.0189737	Bdellovibrionota	14 days vs 21 days
8.7636	-7.45267	1.66331	-4.48064	7.44202e-06	1.82668e-05	3.65335e-05	Candidatus_Eremiobacterota	14 days vs 21 days
28.5875	2.8638	0.47394	6.04252	1.51722e-09	5.85214e-09	1.17043e-08	Gemmatimonadota	14 days vs 21 days
2.53842	1.78422	0.659857	2.70396	0.0068519	0.0115626	0.0190835	Dependentiae	14 days vs 21 days
21.4479	1.83012	0.609356	3.00337	0.00267005	0.00514939	0.00873836	Patescibacteria	14 days vs 21 days
1451	-3.69433	0.70158	-5.26573	1.3963e-07	4.71252e-07	1.00534e-06	Bacillota	14 days vs 21 days
115.928	-8.11049	1.02828	-7.88746	3.08399e-15	4.16339e-14	8.32678e-14	Abditibacteriota	14 days vs 21 days
34.0264	2.11917	0.319787	6.62682	3.42988e-11	2.31517e-10	4.63033e-10	Nitrospirota	14 days vs 21 days
1.23473	4.53615	1.75	2.59208	0.00953977	0.0151514	0.0239604	Elusimicrobiota	14 days vs 21 days
325.508	1.86787	0.488798	3.82135	0.000132722	0.000298624	0.000530886	Acidobacteriota	14 days vs 21 days
8005.75	0.733879	0.23989	3.05923	0.00221903	0.0599138	0.00748923	Bacteroidota	21 days vs 28 days
82.8942	4.60996	1.68834	2.73046	0.00632457	0.0853817	0.0189737	Campylobacterota	21 days vs 28 days

## Sheet: Supplementary Table S2
Supplementary Table S2. Differential abundance in bacterial genera during vermicomposting of seaweeds analyzed using negative binomial models as implemented in the package DESeq2 (Love et al., 2014)
Positive log2FoldChange imply increase in the second vs the first day in comparison column
baseMean	log2FoldChange	lfcSE	stat	pvalue	padj	padj	Phylum	Class	Order	Family	Genus	Comparison
77.5463	5.56706	0.746597	7.45658	8.87996e-14	6.95899e-13	2.03304e-12	Bacteroidota	Bacteroidia	Sphingobacteriales	Sphingobacteriaceae	Sphingobacterium	0 days vs 7 days
60.0424	10.2201	1.19886	8.52485	1.53011e-17	1.83613e-16	5.32478e-16	Bacteroidota	Bacteroidia	Sphingobacteriales	Sphingobacteriaceae	Pedobacter	0 days vs 7 days
117.211	9.67419	1.03725	9.32681	1.09107e-20	1.61142e-19	5.13097e-19	Bacteroidota	Bacteroidia	Sphingobacteriales	Sphingobacteriaceae	Pedobacter	0 days vs 7 days
157.525	8.06916	1.14461	7.04971	1.79287e-12	1.32396e-11	3.6701e-11	Bacteroidota	Bacteroidia	Chitinophagales	Chitinophagaceae	Aurantisolimonas	0 days vs 7 days
111.042	4.10117	0.438603	9.35055	8.71932e-21	1.33929e-19	4.21434e-19	Bacteroidota	Bacteroidia	Chitinophagales	Chitinophagaceae	Taibaiella	0 days vs 7 days
9.40093	8.48376	2.02116	4.19747	2.69909e-05	0.000107963	0.000220489	Bacteroidota	Bacteroidia	Chitinophagales	Chitinophagaceae	Pseudobacter	0 days vs 7 days
794.607	10.7459	0.979883	10.9665	5.53839e-28	1.11934e-26	4.01533e-26	Bacteroidota	Bacteroidia	Chitinophagales	Chitinophagaceae	Agriterribacter	0 days vs 7 days
71.6298	10.9845	1.40058	7.84284	4.40462e-15	4.02708e-14	1.17908e-13	Bacteroidota	Bacteroidia	Chitinophagales	Chitinophagaceae	Terrimonas	0 days vs 7 days
39.4345	8.71544	1.07549	8.10372	5.33033e-16	5.38644e-15	1.5991e-14	Bacteroidota	Bacteroidia	Chitinophagales	Chitinophagaceae	Flavitalea	0 days vs 7 days
251.366	12.8143	0.989559	12.9495	2.36612e-38	1.00954e-36	3.74277e-36	Bacteroidota	Bacteroidia	Chitinophagales	Chitinophagaceae	Flavihumibacter	0 days vs 7 days
10.2132	8.48225	2.44019	3.47606	0.000508838	0.00151468	0.00306622	Bacteroidota	Bacteroidia	Chitinophagales	Chitinophagaceae	Chitinophaga	0 days vs 7 days
34.649	9.24539	1.43879	6.42579	1.31189e-10	8.3961e-10	2.13336e-09	Bacteroidota	Bacteroidia	Chitinophagales	Chitinophagaceae	Chitinophagaceae_unclassified	0 days vs 7 days
95.4159	9.18934	1.20611	7.61896	2.5572e-14	2.08929e-13	6.01287e-13	Bacteroidota	Bacteroidia	Chitinophagales	Chitinophagaceae	Chitinophagaceae_insertae_sedis_genus	0 days vs 7 days
132.31	-8.77267	1.05486	-8.31643	9.0653e-17	9.66433e-16	2.86793e-15	Bacteroidota	Bacteroidia	Chitinophagales	Saprospiraceae	Saprospiraceae_insertae_sedis_genus	0 days vs 7 days
9.5496	-7.27468	2.49343	-2.91754	0.00352807	0.00915391	0.0173413	Bacteroidota	Bacteroidia	Chitinophagales	Saprospiraceae	Saprospiraceae_unclassified	0 days vs 7 days
45.7288	23.1981	1.51453	15.3171	5.88117e-53	5.64592e-51	2.55831e-50	Bacteroidota	Bacteroidia	Chitinophagales	Saprospiraceae	OLB8	0 days vs 7 days
39.4589	5.04561	1.63237	3.09096	0.00199509	0.00535745	0.0103344	Bacteroidota	Bacteroidia	Sphingobacteriales	env.OPS_17	env.OPS_17_insertae_sedis_genus	0 days vs 7 days
10.4358	6.57338	1.60259	4.10173	4.10078e-05	0.000155693	0.000319971	Bacteroidota	Bacteroidia	Flavobacteriales	Crocinitomicaceae	Crocinitomicaceae_unclassified	0 days vs 7 days
123.376	12.0386	1.41385	8.51475	1.66954e-17	1.94273e-16	5.69607e-16	Bacteroidota	Bacteroidia	Flavobacteriales	Crocinitomicaceae	Fluviicola	0 days vs 7 days
19.1068	5.46376	1.48563	3.67775	0.000235301	0.0007857	0.0015747	Bacteroidota	Bacteroidia	Flavobacteriales	NS9_marine_group	NS9_marine_group_insertae_sedis_genus	0 days vs 7 days
11.0221	-7.48163	2.40453	-3.11148	0.00186153	0.00506969	0.00978567	Bacteroidota	Bacteroidia	Flavobacteriales	Flavobacteriaceae	Maribacter	0 days vs 7 days
285.856	-1.98318	0.597028	-3.32176	0.000894528	0.00262213	0.00511999	Bacteroidota	Bacteroidia	Flavobacteriales	Flavobacteriaceae	Lutibacter	0 days vs 7 days
2480.24	6.1437	0.350284	17.5392	7.19488e-69	2.76283e-66	1.25191e-65	Bacteroidota	Bacteroidia	Flavobacteriales	Flavobacteriaceae	Flavobacterium	0 days vs 7 days
14.16	-7.84299	2.24543	-3.49287	0.000477864	0.00143359	0.00290728	Bacteroidota	Bacteroidia	Flavobacteriales	Flavobacteriaceae	Dokdonia	0 days vs 7 days
20.3856	-8.36884	2.05565	-4.07115	4.67812e-05	0.000169612	0.000355751	Bacteroidota	Bacteroidia	Flavobacteriales	Flavobacteriaceae	Flavobacteriaceae_unclassified	0 days vs 7 days
15.2167	-7.94661	2.27362	-3.49514	0.000473813	0.00143263	0.00289275	Bacteroidota	Bacteroidia	Flavobacteriales	Flavobacteriaceae	Hyunsoonleella	0 days vs 7 days
321.692	6.65541	0.669153	9.94602	2.6247e-23	4.58129e-22	1.57482e-21	Bacteroidota	Bacteroidia	Flavobacteriales	Flavobacteriaceae	Mariniflexile	0 days vs 7 days
218.572	7.24054	0.899354	8.05082	8.22408e-16	7.89512e-15	2.34588e-14	Bacteroidota	Bacteroidia	Flavobacteriales	Flavobacteriaceae	Arenibacter	0 days vs 7 days
35.3394	-9.16257	1.71618	-5.33894	9.34911e-08	5.05642e-07	1.12968e-06	Bacteroidota	Bacteroidia	Flavobacteriales	Flavobacteriaceae	Croceitalea	0 days vs 7 days
9.59626	-7.28179	2.52275	-2.88645	0.00389613	0.00990804	0.0189895	Bacteroidota	Bacteroidia	Flavobacteriales	Flavobacteriaceae	Maribacter	0 days vs 7 days
10.1365	8.3766	2.13751	3.91887	8.89659e-05	0.000313421	0.000653167	Bacteroidota	Bacteroidia	Flavobacteriales	Weeksellaceae	Moheibacter	0 days vs 7 days
8.6982	4.59164	1.6613	2.76389	0.00571176	0.0143354	0.0266447	Bacteroidota	Bacteroidia	Sphingobacteriales	NS11-12_marine_group	NS11-12_marine_group_insertae_sedis_genus	0 days vs 7 days
19.4472	5.32051	1.48258	3.58867	0.000332367	0.00105479	0.00214192	Bacteroidota	Bacteroidia	Cytophagales	Microscillaceae	OLB12	0 days vs 7 days
261.025	20.325	1.43142	14.1992	9.26857e-46	5.08447e-44	1.79192e-43	Bacteroidota	Bacteroidia	Cytophagales	Microscillaceae	Chryseolinea	0 days vs 7 days
446.884	9.54359	1.09213	8.73848	2.36266e-18	2.92666e-17	8.93703e-17	Bacteroidota	Bacteroidia	Cytophagales	Microscillaceae	Microscillaceae_unclassified	0 days vs 7 days
167.72	9.29295	1.00158	9.27831	1.7218e-20	2.36132e-19	7.68187e-19	Bacteroidota	Bacteroidia	Cytophagales	Cytophagaceae	Cytophaga	0 days vs 7 days
312.41	10.6708	0.845715	12.6175	1.69192e-36	6.49697e-35	2.26457e-34	Bacteroidota	Bacteroidia	Cytophagales	Cyclobacteriaceae	Algoriphagus	0 days vs 7 days
263.143	13.0033	1.29986	10.0036	1.46976e-23	2.68755e-22	9.13348e-22	Bacteroidota	Bacteroidia	Cytophagales	Spirosomataceae	Emticicia	0 days vs 7 days
71.8661	10.343	1.37449	7.52501	5.27174e-14	4.21739e-13	1.22304e-12	Bacteroidota	Bacteroidia	Cytophagales	Spirosomataceae	Rhabdobacter	0 days vs 7 days
21.738	6.95564	1.19969	5.79785	6.71709e-09	4.03026e-08	9.63375e-08	Bacteroidota	Bacteroidia	Cytophagales	Spirosomataceae	Persicitalea	0 days vs 7 days
9.12287	8.07713	2.15372	3.75032	0.000176609	0.000594894	0.00121462	Bacteroidota	Bacteroidia	Cytophagales	Spirosomataceae	Fibrisoma	0 days vs 7 days
10.9683	7.38922	2.46385	2.99906	0.00270817	0.00714427	0.0136191	Bacteroidota	Bacteroidia	Cytophagales	Spirosomataceae	Larkinella	0 days vs 7 days
353.989	11.6651	1.05664	11.0398	2.45675e-28	5.24108e-27	1.85859e-26	Bacteroidota	Bacteroidia	Cytophagales	Spirosomataceae	Dyadobacter	0 days vs 7 days
11.5377	6.16074	1.59776	3.85585	0.000115328	0.000398974	0.000822423	Planctomycetota	Phycisphaerae	Phycisphaerales	Phycisphaeraceae	SM1A02	0 days vs 7 days
130.465	6.02775	1.37104	4.39647	1.10025e-05	4.91274e-05	9.97101e-05	Planctomycetota	Planctomycetes	Planctomycetales	Rubinisphaeraceae	SH-PL14	0 days vs 7 days
23.7642	-7.10846	1.40004	-5.07732	3.82787e-07	1.93408e-06	4.18899e-06	Planctomycetota	Planctomycetes	Planctomycetales	Rubinisphaeraceae	Rubinisphaeraceae_unclassified	0 days vs 7 days
183.601	9.6027	1.0137	9.4729	2.72186e-21	4.35497e-20	1.35315e-19	Planctomycetota	Planctomycetes	Planctomycetales	Rubinisphaeraceae	Planctomicrobium	0 days vs 7 days
16.7023	8.91258	1.60123	5.56607	2.60554e-08	1.45004e-07	3.43458e-07	Planctomycetota	Planctomycetes	Planctomycetales	Rubinisphaeraceae	Rubinisphaera	0 days vs 7 days
82.0013	-2.59388	0.624879	-4.15101	3.31018e-05	0.000129463	0.000265424	Planctomycetota	Planctomycetes	Pirellulales	Pirellulaceae	Pir4_lineage	0 days vs 7 days
52.0355	-9.38974	1.10494	-8.49799	1.92902e-17	2.17866e-16	6.45481e-16	Planctomycetota	Planctomycetes	Pirellulales	Pirellulaceae	Mariniblastus	0 days vs 7 days
318.565	1.42347	0.556185	2.55934	0.0104871	0.025169	0.0460797	Planctomycetota	Planctomycetes	Pirellulales	Pirellulaceae	Pirellula	0 days vs 7 days
136.162	-5.99218	1.2213	-4.90641	9.27593e-07	4.50881e-06	9.78189e-06	Planctomycetota	Planctomycetes	Pirellulales	Pirellulaceae	Pirellulaceae_insertae_sedis_genus	0 days vs 7 days
53.9544	8.97901	1.35696	6.61703	3.66498e-11	2.42647e-10	6.37706e-10	Planctomycetota	Planctomycetes	Planctomycetales	Schlesneriaceae	Planctopirus	0 days vs 7 days
304.363	7.1852	1.26983	5.65841	1.52785e-08	8.62788e-08	2.06083e-07	Planctomycetota	Planctomycetes	Gemmatales	Gemmataceae	Gemmataceae_unclassified	0 days vs 7 days
67.4605	6.18166	1.22107	5.06248	4.13837e-07	2.06381e-06	4.50047e-06	Planctomycetota	Planctomycetes	Isosphaerales	Isosphaeraceae	Isosphaeraceae_insertae_sedis_genus	0 days vs 7 days
164.575	6.52754	1.37442	4.7493	2.04125e-06	9.44386e-06	2.01805e-05	Acidobacteriota	Vicinamibacteria	Vicinamibacterales	Vicinamibacterales_insertae_sedis_family	Vicinamibacterales_insertae_sedis_genus	0 days vs 7 days
23.7521	9.67953	2.3777	4.07096	4.68201e-05	0.000169612	0.000355751	Verrucomicrobiota	Verrucomicrobiia	Opitutales	Opitutaceae	IMCC26134	0 days vs 7 days
45.0317	5.79322	1.33575	4.33706	1.444e-05	6.16107e-05	0.000127541	Verrucomicrobiota	Verrucomicrobiia	Pedosphaerales	Pedosphaeraceae	Oikopleura	0 days vs 7 days
114.925	4.481	1.26267	3.54883	0.000386946	0.00120803	0.00243064	Verrucomicrobiota	Verrucomicrobiia	Chthoniobacterales	Chthoniobacteraceae	Chthoniobacter	0 days vs 7 days
12.5128	21.5776	3.16182	6.82443	8.82732e-12	6.2772e-11	1.66951e-10	Verrucomicrobiota	Verrucomicrobiia	Chthoniobacterales	01D2Z36	01D2Z36_insertae_sedis_genus	0 days vs 7 days
52.9314	8.37824	1.25618	6.66964	2.56427e-11	1.75836e-10	4.5529e-10	Verrucomicrobiota	Verrucomicrobiia	Chthoniobacterales	Xiphinematobacteraceae	Candidatus_Xiphinematobacter	0 days vs 7 days
746.003	13.1879	1.05557	12.4936	8.09216e-36	2.8249e-34	1.00574e-33	Verrucomicrobiota	Verrucomicrobiia	Chthoniobacterales	Terrimicrobiaceae	Terrimicrobium	0 days vs 7 days
29.2963	8.23379	1.22144	6.74104	1.57256e-11	1.09793e-10	2.9109e-10	Verrucomicrobiota	Verrucomicrobiia	Chthoniobacterales	Chthoniobacteraceae	Chthoniobacteraceae_unclassified	0 days vs 7 days
17.636	8.69647	1.45663	5.97027	2.36861e-09	1.46701e-08	3.52255e-08	Verrucomicrobiota	Verrucomicrobiia	Chthoniobacterales	Chthoniobacteraceae	Chthoniobacteraceae_unclassified	0 days vs 7 days
99.5195	9.39398	1.1206	8.38298	5.16053e-17	5.66184e-16	1.66284e-15	Verrucomicrobiota	Verrucomicrobiia	Verrucomicrobiales	Verrucomicrobiaceae	Verrucomicrobiaceae_insertae_sedis_genus	0 days vs 7 days
2232.71	14.0948	0.970357	14.5254	8.36846e-48	6.42698e-46	2.42685e-45	Verrucomicrobiota	Verrucomicrobiia	Verrucomicrobiales	Rubritaleaceae	Luteolibacter	0 days vs 7 days
167.453	3.13399	0.544954	5.75091	8.87617e-09	5.08724e-08	1.22576e-07	Verrucomicrobiota	Verrucomicrobiia	Verrucomicrobiales	Rubritaleaceae	Luteolibacter	0 days vs 7 days
36.5324	-3.4118	1.17269	-2.90938	0.00362148	0.00933322	0.0177504	Verrucomicrobiota	Verrucomicrobiia	Verrucomicrobiales	DEV007	DEV007_insertae_sedis_genus	0 days vs 7 days
32.5681	-9.04474	1.75286	-5.15999	2.46967e-07	1.28156e-06	2.7724e-06	Verrucomicrobiota	Verrucomicrobiia	Verrucomicrobiales	Rubritaleaceae	Roseibacillus	0 days vs 7 days
209.693	12.5551	1.07671	11.6607	2.02381e-31	5.18095e-30	1.85338e-29	Verrucomicrobiota	Verrucomicrobiia	Verrucomicrobiales	Verrucomicrobiaceae	Verrucomicrobium	0 days vs 7 days
39.8904	4.96005	1.35289	3.66626	0.000246121	0.000807782	0.00163454	Verrucomicrobiota	Verrucomicrobiia	Verrucomicrobiales	Verrucomicrobiaceae	Roseimicrobium	0 days vs 7 days
231.446	9.99634	0.870954	11.4775	1.71242e-30	3.86805e-29	1.41886e-28	Verrucomicrobiota	Verrucomicrobiia	Verrucomicrobiales	Verrucomicrobiaceae	Prosthecobacter	0 days vs 7 days
26.2274	6.94799	1.67503	4.14798	3.35415e-05	0.000129463	0.000267717	Bdellovibrionota	Oligoflexia	0319-6G20	0319-6G20_insertae_sedis_family	0319-6G20_insertae_sedis_genus	0 days vs 7 days
29.0111	9.46937	1.1921	7.94343	1.96662e-15	1.84191e-14	5.51922e-14	Myxococcota	Myxococcia	Myxococcales	Myxococcaceae	Corallococcus	0 days vs 7 days
22.9465	-8.53953	2.00154	-4.26649	1.98576e-05	8.19928e-05	0.000168548	Pseudomonadota	Gammaproteobacteria	Granulosicoccales	Granulosicoccaceae	Granulosicoccus	0 days vs 7 days
97.3992	6.44845	1.51885	4.24561	2.17995e-05	8.90532e-05	0.000182361	Pseudomonadota	Gammaproteobacteria	Gammaproteobacteria_unclassified	Gammaproteobacteria_unclassified	Gammaproteobacteria_unclassified	0 days vs 7 days
8.12441	8.67165	3.42332	2.53311	0.0113056	0.026965	0.0491795	Pseudomonadota	Gammaproteobacteria	Burkholderiales	Oxalobacteraceae	Oxalicibacterium	0 days vs 7 days
187.381	3.7049	0.903685	4.09977	4.1356e-05	0.000155693	0.000321248	Pseudomonadota	Gammaproteobacteria	Burkholderiales	Comamonadaceae	Hydrogenophaga	0 days vs 7 days
11.7949	9.10206	3.36018	2.7088	0.00675271	0.0167293	0.0310019	Pseudomonadota	Gammaproteobacteria	Burkholderiales	Comamonadaceae	Pseudorhodoferax	0 days vs 7 days
405.775	3.54367	0.304651	11.6319	2.83786e-31	6.81087e-30	2.46894e-29	Pseudomonadota	Gammaproteobacteria	Burkholderiales	Comamonadaceae	Comamonadaceae_unclassified	0 days vs 7 days
51.8169	-4.1307	1.29929	-3.1792	0.00147681	0.00413937	0.007931	Pseudomonadota	Gammaproteobacteria	Burkholderiales	Burkholderiales_unclassified	Burkholderiales_unclassified	0 days vs 7 days
95.7991	4.43421	1.22897	3.60807	0.000308484	0.000987148	0.0019954	Pseudomonadota	Gammaproteobacteria	Burkholderiales	SC-I-84	SC-I-84_insertae_sedis_genus	0 days vs 7 days
95.2727	7.29458	0.624033	11.6894	1.44369e-31	3.95983e-30	1.39557e-29	Pseudomonadota	Gammaproteobacteria	Burkholderiales	Alcaligenaceae	Achromobacter	0 days vs 7 days
17.0292	-4.25344	1.21287	-3.50693	0.000453311	0.00139257	0.00280654	Pseudomonadota	Gammaproteobacteria	Burkholderiales	Chitinibacteraceae	Chitinibacteraceae_unclassified	0 days vs 7 days
8.07599	7.10837	2.3837	2.98208	0.00286301	0.00747887	0.014315	Pseudomonadota	Gammaproteobacteria	Burkholderiales	Procabacteriaceae	Procabacter	0 days vs 7 days
72.0112	10.8535	1.42192	7.633	2.29355e-14	1.91462e-13	5.46682e-13	Pseudomonadota	Gammaproteobacteria	Enterobacterales	Alteromonadaceae	Rheinheimera	0 days vs 7 days
8.23367	7.30221	2.32895	3.13541	0.00171616	0.00474103	0.00913184	Pseudomonadota	Gammaproteobacteria	Lysobacterales	Rhodanobacteraceae	Dokdonella	0 days vs 7 days
38.9007	9.73869	1.07976	9.01934	1.89221e-19	2.50555e-18	7.83917e-18	Pseudomonadota	Gammaproteobacteria	Lysobacterales	Lysobacteraceae	Arenimonas	0 days vs 7 days
392.139	13.5394	0.950273	14.2479	4.6221e-46	2.95814e-44	1.00531e-43	Pseudomonadota	Gammaproteobacteria	Lysobacterales	Lysobacteraceae	Pseudoxanthomonas	0 days vs 7 days
52.1251	11.0842	1.19117	9.30528	1.33634e-20	1.90057e-19	6.11901e-19	Pseudomonadota	Gammaproteobacteria	Lysobacterales	Lysobacteraceae	Stenotrophomonas	0 days vs 7 days
13.5614	-7.7807	2.26606	-3.43358	0.000595662	0.00175949	0.00353738	Pseudomonadota	Gammaproteobacteria	Beggiatoales	Leucotrichaceae	Leucothrix	0 days vs 7 days
136.095	11.1281	1.1205	9.93138	3.04004e-23	5.07554e-22	1.76322e-21	Pseudomonadota	Gammaproteobacteria	Rickettsiellales	Rickettsiellaceae	Rickettsiella	0 days vs 7 days
228.94	3.31115	0.782101	4.23366	2.29924e-05	9.29375e-05	0.000190072	Pseudomonadota	Gammaproteobacteria	Pseudomonadales	Pseudomonadaceae	Pseudomonas	0 days vs 7 days
207.293	2.25291	0.456871	4.93118	8.17365e-07	4.02395e-06	8.67204e-06	Pseudomonadota	Gammaproteobacteria	Pseudomonadales	Pseudomonadaceae	Pseudomonas	0 days vs 7 days
20.5378	-8.3792	2.30789	-3.63067	0.000282685	0.000912195	0.00185612	Pseudomonadota	Gammaproteobacteria	Enterobacterales	Vibrionaceae	Vibrio	0 days vs 7 days
106.487	-4.64417	0.835914	-5.5558	2.76341e-08	1.51593e-07	3.61528e-07	Pseudomonadota	Gammaproteobacteria	Enterobacterales	Aeromonadaceae	Aeromonas	0 days vs 7 days
77.3727	-4.73076	0.98375	-4.80891	1.51756e-06	7.10663e-06	1.52633e-05	Pseudomonadota	Gammaproteobacteria	Enterobacterales	Shewanellaceae	Shewanella	0 days vs 7 days
12.0085	-7.60524	2.33727	-3.2539	0.00113832	0.00326205	0.00628787	Pseudomonadota	Gammaproteobacteria	Enterobacterales	Enterobacteriaceae	Salmonella	0 days vs 7 days
1326.83	10.4879	0.649213	16.1547	1.05154e-58	1.34597e-56	6.0989e-56	Pseudomonadota	Gammaproteobacteria	Pseudomonadales	Cellvibrionaceae	Cellvibrio	0 days vs 7 days
8.56416	6.86252	2.52355	2.71939	0.00654021	0.0163081	0.0301057	Cyanobacteriota	Sericytochromatia	Sericytochromatia_insertae_sedis_order	Sericytochromatia_insertae_sedis_family	Sericytochromatia_insertae_sedis_genus	0 days vs 7 days
55.0582	9.05163	1.08882	8.31325	9.31199e-17	9.66433e-16	2.89337e-15	Pseudomonadota	Alphaproteobacteria	Reyranellales	Reyranellaceae	Reyranella	0 days vs 7 days
26.5025	8.9496	1.16562	7.67795	1.61654e-14	1.4108e-13	4.01826e-13	Bdellovibrionota	Bdellovibrionia	Bdellovibrionales	Pseudobdellovibrionaceae	Pseudobdellovibrionaceae_insertae_sedis_genus	0 days vs 7 days
13.4618	8.84311	1.19558	7.3965	1.39825e-13	1.0528e-12	3.0797e-12	Pseudomonadota	Alphaproteobacteria	Rickettsiales	SM2D12	SM2D12_insertae_sedis_genus	0 days vs 7 days
367.615	14.0484	1.1503	12.2129	2.65333e-34	8.49065e-33	3.07786e-32	Pseudomonadota	Alphaproteobacteria	Caulobacterales	Caulobacteraceae	Brevundimonas	0 days vs 7 days
15.0102	8.50849	2.20809	3.85333	0.000116521	0.0003995	0.000827537	Pseudomonadota	Alphaproteobacteria	Caulobacterales	Caulobacteraceae	Caulobacteraceae_unclassified	0 days vs 7 days
33.2778	8.94872	1.10879	8.07069	6.99041e-16	6.88287e-15	2.02722e-14	Pseudomonadota	Alphaproteobacteria	Caulobacterales	Caulobacteraceae	Asticcacaulis	0 days vs 7 days
35.3517	10.3556	1.74871	5.92183	3.18373e-09	1.94056e-08	4.6552e-08	Pseudomonadota	Alphaproteobacteria	Hyphomicrobiales	Rhizobiaceae	Agrobacterium	0 days vs 7 days
9.15989	8.68394	2.89644	2.99814	0.00271631	0.00714427	0.0136207	Pseudomonadota	Alphaproteobacteria	Hyphomicrobiales	Rhizobiaceae	Rhizobiaceae_unclassified	0 days vs 7 days
488.678	7.38765	0.424199	17.4155	6.28822e-68	1.20734e-65	5.47075e-65	Pseudomonadota	Alphaproteobacteria	Hyphomicrobiales	Rhizobiaceae	Rhizobiaceae_unclassified	0 days vs 7 days
9.90385	8.3798	2.02078	4.14681	3.37143e-05	0.000129463	0.000267867	Pseudomonadota	Alphaproteobacteria	Hyphomicrobiales	Rhizobiaceae	Rhizobiaceae_unclassified	0 days vs 7 days
58.9737	10.5111	1.18296	8.88543	6.36744e-19	8.15032e-18	2.46208e-17	Pseudomonadota	Alphaproteobacteria	Hyphomicrobiales	Rhizobiaceae	Rhizobiaceae_unclassified	0 days vs 7 days
21.5038	9.49447	1.45847	6.5099	7.52002e-11	4.89439e-10	1.25816e-09	Pseudomonadota	Alphaproteobacteria	Hyphomicrobiales	Rhizobiaceae	Shinella	0 days vs 7 days
11.4571	8.70444	1.38146	6.30089	2.95932e-10	1.86292e-09	4.63893e-09	Pseudomonadota	Alphaproteobacteria	Micavibrionales	Micavibrionales_insertae_sedis_family	Micavibrionales_insertae_sedis_genus	0 days vs 7 days
12.6166	8.81113	2.01516	4.37242	1.22876e-05	5.36185e-05	0.000110208	Pseudomonadota	Alphaproteobacteria	Sphingomonadales	Sphingomonadaceae	Sphingomonas	0 days vs 7 days
80.1759	11.2619	1.06083	10.6162	2.50531e-26	4.8102e-25	1.67663e-24	Pseudomonadota	Alphaproteobacteria	Sphingomonadales	Sphingomonadaceae	Sphingopyxis	0 days vs 7 days
48.7563	8.63325	1.49196	5.78653	7.18538e-09	4.2449e-08	1.01647e-07	Pseudomonadota	Alphaproteobacteria	Sphingomonadales	Sphingomonadaceae	Novosphingobium	0 days vs 7 days
20.3305	8.99543	1.16247	7.73819	1.00843e-14	9.00549e-14	2.58039e-13	Pseudomonadota	Alphaproteobacteria	Sphingomonadales	Sphingomonadaceae	Sphingomonadaceae_unclassified	0 days vs 7 days
10.8889	-7.46405	2.41465	-3.09116	0.00199379	0.00535745	0.0103344	Pseudomonadota	Alphaproteobacteria	Caulobacterales	Hyphomonadaceae	Hyphomonadaceae_unclassified	0 days vs 7 days
14.4896	8.91811	2.44819	3.64273	0.000269757	0.000877852	0.00177794	Pseudomonadota	Alphaproteobacteria	Caulobacterales	Hyphomonadaceae	Hyphomonas	0 days vs 7 days
32.6407	8.87306	1.73613	5.11082	3.20764e-07	1.64231e-06	3.53247e-06	Pseudomonadota	Alphaproteobacteria	Hyphomicrobiales	Kaistiaceae	Kaistia	0 days vs 7 days
205.67	12.4393	1.02864	12.0929	1.15102e-33	3.39992e-32	1.25173e-31	Pseudomonadota	Alphaproteobacteria	Hyphomicrobiales	Devosiaceae	Devosia	0 days vs 7 days
338.682	13.3856	0.963502	13.8927	7.01595e-44	3.36765e-42	1.22077e-41	Pseudomonadota	Alphaproteobacteria	Hyphomicrobiales	Devosiaceae	Devosia	0 days vs 7 days
14.482	8.67067	1.95541	4.43419	9.24212e-06	4.17526e-05	8.50862e-05	Pseudomonadota	Alphaproteobacteria	Hyphomicrobiales	Beijerinckiaceae	Bosea	0 days vs 7 days
40.4388	6.65996	1.37582	4.84073	1.29365e-06	6.13286e-06	1.33192e-05	Pseudomonadota	Alphaproteobacteria	Hyphomicrobiales	Xanthobacteraceae	Xanthobacteraceae_unclassified	0 days vs 7 days
37.9471	5.38008	1.32417	4.06297	4.84517e-05	0.000173883	0.000366548	Pseudomonadota	Alphaproteobacteria	Rhodobacterales	Paracoccaceae	Paracoccaceae_unclassified	0 days vs 7 days
30.9334	2.20413	0.826904	2.66553	0.00768677	0.0186818	0.0348307	Pseudomonadota	Alphaproteobacteria	Rhodobacterales	Paracoccaceae	Pseudorhodobacter	0 days vs 7 days
24.8781	8.12565	1.53749	5.28502	1.25694e-07	6.70367e-07	1.49323e-06	Pseudomonadota	Alphaproteobacteria	Rhodobacterales	Paracoccaceae	Gemmobacter	0 days vs 7 days
11.073	9.01461	2.82369	3.19249	0.00141051	0.00398261	0.0075984	Pseudomonadota	Alphaproteobacteria	Rhodobacterales	Paracoccaceae	Cereibacter	0 days vs 7 days
9.47282	-7.26314	2.51596	-2.88683	0.00389149	0.00990804	0.0189895	Pseudomonadota	Alphaproteobacteria	Rhodobacterales	Paracoccaceae	Yoonia	0 days vs 7 days
10.6852	-7.43688	2.43586	-3.05308	0.00226503	0.00604009	0.0115577	Pseudomonadota	Alphaproteobacteria	Rhodobacterales	Paracoccaceae	Sulfitobacter	0 days vs 7 days
52.9249	4.77022	1.18498	4.02558	5.68343e-05	0.000202077	0.000428102	Pseudomonadota	Alphaproteobacteria	Rhodobacterales	Paracoccaceae	Amaricoccus	0 days vs 7 days
12.6314	-7.62736	2.37864	-3.2066	0.00134313	0.00382045	0.00725788	Pseudomonadota	Alphaproteobacteria	Rhodobacterales	Paracoccaceae	Paracoccaceae_unclassified	0 days vs 7 days
30.138	-4.60439	1.1879	-3.87609	0.000106147	0.00037055	0.000760066	Pseudomonadota	Alphaproteobacteria	Alphaproteobacteria_unclassified	Alphaproteobacteria_unclassified	Alphaproteobacteria_unclassified	0 days vs 7 days
35.2451	8.21648	1.19622	6.86868	6.47976e-12	4.69477e-11	1.25275e-10	Pseudomonadota	Alphaproteobacteria	Acetobacterales	Acetobacteraceae	Roseomonas	0 days vs 7 days
8.06618	7.75029	2.19726	3.52725	0.000419908	0.00130036	0.00260943	Bacteria_unclassified	Bacteria_unclassified	Bacteria_unclassified	Bacteria_unclassified	Bacteria_unclassified	0 days vs 7 days
27.7557	-4.0454	1.13529	-3.56331	0.000366206	0.00115265	0.00233371	Campylobacterota	Campylobacteria	Campylobacterales	Arcobacteraceae	Arcobacter	0 days vs 7 days
21.7908	7.71012	1.16318	6.62848	3.39153e-11	2.28482e-10	5.96087e-10	Bdellovibrionota	Bacteriovoracia	Bacteriovoracales	Bacteriovoracaceae	Peredibacter	0 days vs 7 days
114.949	4.68978	1.50592	3.11423	0.00184425	0.0050585	0.00972421	Chloroflexota	KD4-96	KD4-96_insertae_sedis_order	KD4-96_insertae_sedis_family	KD4-96_insertae_sedis_genus	0 days vs 7 days
76.1575	-3.34246	1.0154	-3.29175	0.000995651	0.00289644	0.00562478	Chloroflexota	Anaerolineae	Caldilineales	Caldilineaceae	Caldilineaceae_insertae_sedis_genus	0 days vs 7 days
77.4727	5.84515	1.35592	4.31083	1.6264e-05	6.86306e-05	0.000142208	Chloroflexota	Chloroflexia	Thermomicrobiales	JG30-KF-CM45	JG30-KF-CM45_insertae_sedis_genus	0 days vs 7 days
66.9434	-4.88491	1.2796	-3.81752	0.000134801	0.000458085	0.00094961	Actinomycetota	Acidimicrobiia	Microtrichales	Microtrichales_unclassified	Microtrichales_unclassified	0 days vs 7 days
38.5543	-5.8407	1.10628	-5.27959	1.29473e-07	6.81063e-07	1.52218e-06	Actinomycetota	Acidimicrobiia	Microtrichales	Ilumatobacteraceae	Ilumatobacter	0 days vs 7 days
16.9097	-8.01055	1.64234	-4.87751	1.07431e-06	5.1567e-06	1.12609e-05	Actinomycetota	Acidimicrobiia	Microtrichales	Microtrichaceae	Microtrichaceae_insertae_sedis_genus	0 days vs 7 days
239.092	7.36881	1.28004	5.75669	8.57787e-09	4.99076e-08	1.20358e-07	Actinomycetota	Actinobacteria	Mycobacteriales	Mycobacteriaceae	Mycobacterium	0 days vs 7 days
17.917	5.12345	1.25588	4.07956	4.51201e-05	0.000168215	0.000347385	Actinomycetota	Actinobacteria	Micrococcales	Cellulomonadaceae	Actinotalea	0 days vs 7 days
59.4274	6.10296	1.49869	4.07219	4.65739e-05	0.000169612	0.000355751	Actinomycetota	Actinobacteria	Micrococcales	Demequinaceae	Demequina	0 days vs 7 days
20.6692	7.78839	2.22591	3.49898	0.000467047	0.00142338	0.00286149	Actinomycetota	Actinobacteria	Micrococcales	Microbacteriaceae	Galbitalea	0 days vs 7 days
63.5394	9.68517	1.30303	7.43282	1.06305e-13	8.16426e-13	2.40223e-12	Actinomycetota	Actinobacteria	Micrococcales	Microbacteriaceae	Microbacteriaceae_unclassified	0 days vs 7 days
33.6159	4.57621	1.40113	3.26608	0.00109046	0.0031484	0.00610098	Actinomycetota	Thermoleophilia	Gaiellales	Gaiellaceae	Gaiella	0 days vs 7 days
54.789	3.57967	1.32932	2.69286	0.00708417	0.0173269	0.0322682	Gemmatimonadota	Gemmatimonadia	Gemmatimonadales	Gemmatimonadaceae	Gemmatimonadaceae_insertae_sedis_genus	0 days vs 7 days
24.6096	-8.64051	1.94581	-4.44056	8.97239e-06	4.10166e-05	8.30423e-05	Bacillota	Clostridia	Peptostreptococcales-Tissierellales	Peptostreptococcaceae	Proteocatella	0 days vs 7 days
84.5555	7.75258	1.76896	4.38257	1.17288e-05	5.17684e-05	0.000105741	Bacillota	Clostridia	Peptostreptococcales-Tissierellales	Fusibacteraceae	Fusibacter	0 days vs 7 days
16.0192	-8.02097	2.18667	-3.66812	0.000244338	0.000807782	0.00162892	Bacillota	Clostridia	Peptostreptococcales-Tissierellales	Peptostreptococcaceae	Terrisporobacter	0 days vs 7 days
127.24	-11.0073	2.6378	-4.17291	3.00728e-05	0.000119051	0.000242253	Bacillota	Clostridia	Clostridiales	Clostridiaceae	Clostridium	0 days vs 7 days
76.3757	-10.2741	3.26313	-3.14853	0.00164095	0.00456613	0.00878541	Bacillota	Clostridia	Clostridiales	Clostridiaceae	Clostridium	0 days vs 7 days
8.08306	-7.03404	2.60895	-2.69612	0.00701531	0.0172685	0.0320384	Bacillota	Clostridia	Clostridiales	Clostridiaceae	Clostridium	0 days vs 7 days
128.976	10.4353	1.36193	7.66215	1.82839e-14	1.56023e-13	4.48085e-13	Abditibacteriota	Abditibacteriia	Abditibacteriales	Abditibacteriaceae	Abditibacterium	0 days vs 7 days
7.43836	3.90522	1.47213	2.65276	0.00798366	0.0192813	0.036082	Patescibacteria	Parcubacteria	Parcubacteria_unclassified	Parcubacteria_unclassified	Parcubacteria_unclassified	0 days vs 7 days
36.8902	6.10715	1.4191	4.30353	1.681e-05	7.01636e-05	0.000146247	Acidobacteriota	Acidobacteriae	Bryobacterales	Bryobacteraceae	Bryobacter	0 days vs 7 days
74.6243	3.53944	1.27349	2.77933	0.00544719	0.0137613	0.0255474	Nitrospirota	Nitrospiria	Nitrospirales	Nitrospiraceae	Nitrospira	0 days vs 7 days
118.575	5.69973	1.30512	4.36722	1.25838e-05	5.42941e-05	0.000112286	Acidobacteriota	Blastocatellia	Blastocatellales	Blastocatellaceae	Blastocatellaceae_insertae_sedis_genus	0 days vs 7 days
48.0163	3.57678	1.28354	2.78665	0.00532558	0.0221899	0.0251125	Bacteroidota	Bacteroidia	Bacteroidales	Tannerellaceae	Macellibacteroides	7 days vs 14 days
21.8378	2.27725	0.69095	3.29582	0.000981336	0.0055398	0.00556197	Bacteroidota	Bacteroidia	Chitinophagales	Chitinophagales_insertae_sedis_family	Chitinophagales_insertae_sedis_genus	7 days vs 14 days
111.042	1.22321	0.414236	2.95294	0.00314767	0.0143076	0.0156933	Bacteroidota	Bacteroidia	Chitinophagales	Chitinophagaceae	Taibaiella	7 days vs 14 days
42.8685	5.82877	1.50255	3.87924	0.000104783	0.000797259	0.000753396	Bacteroidota	Bacteroidia	Chitinophagales	Chitinophagaceae	Dinghuibacter	7 days vs 14 days
794.607	2.648	0.35813	7.39397	1.42512e-13	1.24698e-11	3.09964e-12	Bacteroidota	Bacteroidia	Chitinophagales	Chitinophagaceae	Agriterribacter	7 days vs 14 days
132.31	4.16106	1.10242	3.77447	0.00016035	0.00112245	0.00110718	Bacteroidota	Bacteroidia	Chitinophagales	Saprospiraceae	Saprospiraceae_insertae_sedis_genus	7 days vs 14 days
39.4589	4.2668	1.35748	3.14318	0.00167121	0.00873023	0.00891998	Bacteroidota	Bacteroidia	Sphingobacteriales	env.OPS_17	env.OPS_17_insertae_sedis_genus	7 days vs 14 days
285.856	3.53624	0.597026	5.9231	3.15929e-09	9.77608e-08	4.6552e-08	Bacteroidota	Bacteroidia	Flavobacteriales	Flavobacteriaceae	Lutibacter	7 days vs 14 days
2480.24	0.978307	0.342131	2.85946	0.00424369	0.0181133	0.0203416	Bacteroidota	Bacteroidia	Flavobacteriales	Flavobacteriaceae	Flavobacterium	7 days vs 14 days
10.9055	-6.92667	2.05808	-3.3656	0.000763771	0.00445533	0.00442987	Bacteroidota	Bacteroidia	Flavobacteriales	Weeksellaceae	Chryseobacterium	7 days vs 14 days
19.4472	-3.77024	1.48259	-2.543	0.0109904	0.0418114	0.0479282	Bacteroidota	Bacteroidia	Cytophagales	Microscillaceae	OLB12	7 days vs 14 days
261.025	3.06078	1.10457	2.77101	0.00558828	0.0230105	0.0261387	Bacteroidota	Bacteroidia	Cytophagales	Microscillaceae	Chryseolinea	7 days vs 14 days
446.884	2.29013	0.60172	3.80597	0.000141251	0.00105187	0.000991034	Bacteroidota	Bacteroidia	Cytophagales	Microscillaceae	Microscillaceae_unclassified	7 days vs 14 days
167.72	3.56157	0.41416	8.5995	8.00661e-18	2.80231e-15	2.96415e-16	Bacteroidota	Bacteroidia	Cytophagales	Cytophagaceae	Cytophaga	7 days vs 14 days
21.738	2.39086	0.785546	3.04356	0.00233795	0.0110579	0.0118949	Bacteroidota	Bacteroidia	Cytophagales	Spirosomataceae	Persicitalea	7 days vs 14 days
47.216	7.29718	1.32525	5.50625	3.66558e-08	8.01846e-07	4.65556e-07	Planctomycetota	Phycisphaerae	Tepidisphaerales	WD2101_soil_group	WD2101_soil_group_insertae_sedis_genus	7 days vs 14 days
10.7061	5.04185	1.6312	3.09089	0.0019956	0.00970085	0.0103344	Planctomycetota	Phycisphaerae	Tepidisphaerales	Tepidisphaeraceae	Tepidisphaera	7 days vs 14 days
130.465	4.939	1.02499	4.81858	1.44583e-06	1.80728e-05	1.46264e-05	Planctomycetota	Planctomycetes	Planctomycetales	Rubinisphaeraceae	SH-PL14	7 days vs 14 days
23.7642	6.11339	1.40808	4.34164	1.41421e-05	0.000141421	0.000125548	Planctomycetota	Planctomycetes	Planctomycetales	Rubinisphaeraceae	Rubinisphaeraceae_unclassified	7 days vs 14 days
183.601	3.09731	0.442795	6.99489	2.65458e-12	1.85821e-10	5.3709e-11	Planctomycetota	Planctomycetes	Planctomycetales	Rubinisphaeraceae	Planctomicrobium	7 days vs 14 days
82.0013	2.68726	0.630129	4.26462	2.00243e-05	0.000179705	0.000169137	Planctomycetota	Planctomycetes	Pirellulales	Pirellulaceae	Pir4_lineage	7 days vs 14 days
52.0355	3.91056	1.15927	3.37329	0.000742748	0.00440614	0.00433685	Planctomycetota	Planctomycetes	Pirellulales	Pirellulaceae	Mariniblastus	7 days vs 14 days
318.565	2.59222	0.546205	4.74587	2.07609e-06	2.34397e-05	2.0409e-05	Planctomycetota	Planctomycetes	Pirellulales	Pirellulaceae	Pirellula	7 days vs 14 days
136.162	7.90089	1.22037	6.47415	9.53457e-11	4.17137e-09	1.58001e-09	Planctomycetota	Planctomycetes	Pirellulales	Pirellulaceae	Pirellulaceae_insertae_sedis_genus	7 days vs 14 days
253.111	3.27223	0.906628	3.60923	0.000307105	0.0019905	0.0019954	Planctomycetota	Planctomycetes	Planctomycetales	Planctomycetales_insertae_sedis_family	Planctomycetales_insertae_sedis_genus	7 days vs 14 days
51.2223	6.70268	1.21675	5.50869	3.61522e-08	8.01846e-07	4.62535e-07	Planctomycetota	Planctomycetes	Gemmatales	Gemmataceae	Gemmata	7 days vs 14 days
304.363	4.14163	0.884621	4.68181	2.8436e-06	3.01594e-05	2.76417e-05	Planctomycetota	Planctomycetes	Gemmatales	Gemmataceae	Gemmataceae_unclassified	7 days vs 14 days
67.4605	4.51738	0.813968	5.54983	2.85956e-08	7.14889e-07	3.71316e-07	Planctomycetota	Planctomycetes	Isosphaerales	Isosphaeraceae	Isosphaeraceae_insertae_sedis_genus	7 days vs 14 days
144.286	7.37014	1.0604	6.95033	3.64444e-12	2.12592e-10	7.28888e-11	Acidobacteriota	Vicinamibacteria	Vicinamibacterales	Vicinamibacteraceae	Vicinamibacteraceae_insertae_sedis_genus	7 days vs 14 days
164.575	3.19076	1.03175	3.09256	0.00198437	0.00970085	0.0103344	Acidobacteriota	Vicinamibacteria	Vicinamibacterales	Vicinamibacterales_insertae_sedis_family	Vicinamibacterales_insertae_sedis_genus	7 days vs 14 days
40.719	5.15816	1.98235	2.60205	0.00926697	0.0356422	0.0412392	Acidobacteriota	Vicinamibacteria	Vicinamibacterales	Vicinamibacteraceae	Luteitalea	7 days vs 14 days
180.069	8.12641	1.06293	7.64531	2.08441e-14	2.43181e-12	5.03732e-13	Verrucomicrobiota	Verrucomicrobiia	Pedosphaerales	Pedosphaeraceae	Pedosphaeraceae_insertae_sedis_genus	7 days vs 14 days
114.925	4.81624	0.878922	5.47972	4.26011e-08	8.28356e-07	5.33281e-07	Verrucomicrobiota	Verrucomicrobiia	Chthoniobacterales	Chthoniobacteraceae	Chthoniobacter	7 days vs 14 days
125.745	2.07474	0.662289	3.13267	0.00173221	0.00880598	0.00918147	Verrucomicrobiota	Verrucomicrobiia	Verrucomicrobiales	Rubritaleaceae	Haloferula	7 days vs 14 days
2232.71	1.73192	0.330407	5.24177	1.59041e-07	2.28274e-06	1.83266e-06	Verrucomicrobiota	Verrucomicrobiia	Verrucomicrobiales	Rubritaleaceae	Luteolibacter	7 days vs 14 days
39.8904	3.07479	1.01166	3.03935	0.00237089	0.0110642	0.0120273	Verrucomicrobiota	Verrucomicrobiia	Verrucomicrobiales	Verrucomicrobiaceae	Roseimicrobium	7 days vs 14 days
48.9815	3.76298	1.4309	2.6298	0.00854358	0.0335983	0.038413	Myxococcota	Polyangiia	Polyangiales	BIrii41	BIrii41_insertae_sedis_genus	7 days vs 14 days
25.1772	5.36876	1.27784	4.20145	2.65215e-05	0.000226403	0.000217676	Myxococcota	Polyangiia	Polyangiales	Sandaracinaceae	Sandaracinaceae_insertae_sedis_genus	7 days vs 14 days
151.932	1.66887	0.606857	2.75003	0.005959	0.0242518	0.0277237	Pseudomonadota	Gammaproteobacteria	Pseudomonadales	Moraxellaceae	Moraxellaceae_insertae_sedis_genus	7 days vs 14 days
8.39236	4.71524	1.37782	3.42225	0.000621042	0.00374767	0.00367556	Pseudomonadota	Gammaproteobacteria	Burkholderiales	Neisseriaceae	Neisseriaceae_insertae_sedis_genus	7 days vs 14 days
26.0236	5.74502	1.32906	4.32262	1.54185e-05	0.000149902	0.000135496	Pseudomonadota	Gammaproteobacteria	Burkholderiales	Sutterellaceae	Sutterellaceae_insertae_sedis_genus	7 days vs 14 days
51.8169	7.0899	1.29042	5.49426	3.92347e-08	8.07772e-07	4.94698e-07	Pseudomonadota	Gammaproteobacteria	Burkholderiales	Burkholderiales_unclassified	Burkholderiales_unclassified	7 days vs 14 days
95.7991	4.48576	0.831701	5.39348	6.91075e-08	1.20938e-06	8.52816e-07	Pseudomonadota	Gammaproteobacteria	Burkholderiales	SC-I-84	SC-I-84_insertae_sedis_genus	7 days vs 14 days
17.0292	4.33319	1.21645	3.56217	0.000367809	0.0022988	0.00233371	Pseudomonadota	Gammaproteobacteria	Burkholderiales	Chitinibacteraceae	Chitinibacteraceae_unclassified	7 days vs 14 days
11.6288	7.43775	1.95929	3.79614	0.000146964	0.00107162	0.00102698	Pseudomonadota	Gammaproteobacteria	Burkholderiales	Chitinibacteraceae	Formivibrio	7 days vs 14 days
97.4812	-2.33244	0.769669	-3.03045	0.00244191	0.0112456	0.0123515	Pseudomonadota	Gammaproteobacteria	Pseudomonadales	Moraxellaceae	Acinetobacter	7 days vs 14 days
106.781	6.10035	1.25696	4.85326	1.21446e-06	1.5743e-05	1.26536e-05	Pseudomonadota	Gammaproteobacteria	Pseudomonadales	Halieaceae	Kineobactrum	7 days vs 14 days
392.139	-0.697651	0.267204	-2.61093	0.00902976	0.0351157	0.0403902	Pseudomonadota	Gammaproteobacteria	Lysobacterales	Lysobacteraceae	Pseudoxanthomonas	7 days vs 14 days
225.394	4.37989	1.06419	4.11571	3.85992e-05	0.000307039	0.000303903	Pseudomonadota	Gammaproteobacteria	Rickettsiellales	Rickettsiellaceae	Aquicella	7 days vs 14 days
106.487	3.13071	0.838334	3.73444	0.000188132	0.00126627	0.00127871	Pseudomonadota	Gammaproteobacteria	Enterobacterales	Aeromonadaceae	Aeromonas	7 days vs 14 days
75.9371	6.93172	1.03673	6.68614	2.29133e-11	1.14566e-09	4.17827e-10	Pseudomonadota	Gammaproteobacteria	Steroidobacterales	Steroidobacteraceae	Steroidobacter	7 days vs 14 days
31.7811	5.46832	1.1644	4.69628	2.64948e-06	2.89787e-05	2.58994e-05	Pseudomonadota	Gammaproteobacteria	PLTA13	PLTA13_insertae_sedis_family	PLTA13_insertae_sedis_genus	7 days vs 14 days
48.6677	5.97527	1.13887	5.24666	1.54884e-07	2.28274e-06	1.79665e-06	Pseudomonadota	Gammaproteobacteria	CCM19a	CCM19a_insertae_sedis_family	CCM19a_insertae_sedis_genus	7 days vs 14 days
40.9858	4.15714	1.52437	2.72712	0.00638893	0.0257026	0.0295658	Pseudomonadota	Gammaproteobacteria	Gammaproteobacteria_unclassified	Gammaproteobacteria_unclassified	Gammaproteobacteria_unclassified	7 days vs 14 days
51.8605	2.48607	0.919542	2.70359	0.00685945	0.0272819	0.0314091	Cyanobacteriota	Cyanobacteriia	Cyanobacteriales	Nostocaceae	Cylindrospermopsis_CRJ1	7 days vs 14 days
43.4572	2.40115	0.83917	2.86134	0.00421851	0.0181133	0.0202768	Cyanobacteriota	Cyanobacteriia	Cyanobacteriales	Nostocaceae	Nostocaceae_unclassified	7 days vs 14 days
10.2729	5.23295	1.41807	3.69019	0.000224083	0.00147979	0.00150542	Pseudomonadota	Alphaproteobacteria	Tistrellales	Geminicoccaceae	Candidatus_Alysiosphaera	7 days vs 14 days
367.615	-1.97013	0.701576	-2.80815	0.00498275	0.0210116	0.023624	Pseudomonadota	Alphaproteobacteria	Caulobacterales	Caulobacteraceae	Brevundimonas	7 days vs 14 days
29.6773	4.72493	1.64683	2.86911	0.00411634	0.018009	0.0198405	Pseudomonadota	Alphaproteobacteria	Hyphomicrobiales	Hyphomicrobiales_unclassified	Hyphomicrobiales_unclassified	7 days vs 14 days
49.0211	6.86508	1.14717	5.98439	2.17209e-09	7.6023e-08	3.28646e-08	Pseudomonadota	Alphaproteobacteria	Hyphomicrobiales	Xanthobacteraceae	Pseudorhodoplanes	7 days vs 14 days
418.796	0.802197	0.272731	2.94135	0.00326786	0.0146635	0.0161997	Pseudomonadota	Alphaproteobacteria	Rhodobacterales	Paracoccaceae	Paracoccaceae_unclassified	7 days vs 14 days
52.9249	4.04707	0.765859	5.28435	1.26152e-07	2.00696e-06	1.49323e-06	Pseudomonadota	Alphaproteobacteria	Rhodobacterales	Paracoccaceae	Amaricoccus	7 days vs 14 days
7.72048	6.40915	1.81437	3.53244	0.000411746	0.00252826	0.00256788	Pseudomonadota	Alphaproteobacteria	Holosporales	Holosporaceae	Holosporaceae_insertae_sedis_genus	7 days vs 14 days
27.7557	4.74785	1.13665	4.17707	2.95286e-05	0.000240349	0.000238975	Campylobacterota	Campylobacteria	Campylobacterales	Arcobacteraceae	Arcobacter	7 days vs 14 days
62.0033	5.41257	1.27203	4.25506	2.08989e-05	0.000182866	0.000175672	Bdellovibrionota	Oligoflexia	Oligoflexales	Oligoflexaceae	Oligoflexus	7 days vs 14 days
21.0813	4.64549	1.40394	3.3089	0.000936617	0.00537403	0.00534332	Hydrogenedentes	Hydrogenedentia	Hydrogenedentiales	Hydrogenedensaceae	Hydrogenedensaceae_insertae_sedis_genus	7 days vs 14 days
114.949	5.14518	1.20111	4.2837	1.83812e-05	0.000169301	0.000157553	Chloroflexota	KD4-96	KD4-96_insertae_sedis_order	KD4-96_insertae_sedis_family	KD4-96_insertae_sedis_genus	7 days vs 14 days
20.2652	5.52611	1.15697	4.77637	1.78491e-06	2.1542e-05	1.78491e-05	Chloroflexota	Anaerolineae	RBG-13-54-9	RBG-13-54-9_insertae_sedis_family	RBG-13-54-9_insertae_sedis_genus	7 days vs 14 days
76.1575	4.63186	1.0166	4.55621	5.20839e-06	5.36157e-05	5.00696e-05	Chloroflexota	Anaerolineae	Caldilineales	Caldilineaceae	Caldilineaceae_insertae_sedis_genus	7 days vs 14 days
15.6985	4.59346	1.46661	3.13203	0.00173604	0.00880598	0.00918147	Chloroflexota	Chloroflexia	Thermomicrobiales	AKYG1722	AKYG1722_insertae_sedis_genus	7 days vs 14 days
77.4727	3.95174	1.00676	3.92519	8.66616e-05	0.000674035	0.000644395	Chloroflexota	Chloroflexia	Thermomicrobiales	JG30-KF-CM45	JG30-KF-CM45_insertae_sedis_genus	7 days vs 14 days
39.192	6.41145	1.19321	5.37327	7.73197e-08	1.28866e-06	9.40813e-07	Actinomycetota	Acidimicrobiia	Actinomarinales	Actinomarinales_insertae_sedis_family	Actinomarinales_insertae_sedis_genus	7 days vs 14 days
66.9434	6.97496	1.27692	5.46232	4.69965e-08	8.65725e-07	5.841e-07	Actinomycetota	Acidimicrobiia	Microtrichales	Microtrichales_unclassified	Microtrichales_unclassified	7 days vs 14 days
17.1783	5.57434	1.55666	3.58096	0.000342329	0.00217846	0.00219252	Actinomycetota	Acidimicrobiia	Microtrichales	Iamiaceae	Aquihabitans	7 days vs 14 days
38.5543	6.78889	1.10889	6.12224	9.22672e-10	3.58817e-08	1.40829e-08	Actinomycetota	Acidimicrobiia	Microtrichales	Ilumatobacteraceae	Ilumatobacter	7 days vs 14 days
42.0133	6.53152	1.13632	5.74793	9.03401e-09	2.43223e-07	1.23773e-07	Actinomycetota	Acidimicrobiia	Acidimicrobiales	Acidimicrobiaceae	Acidiferrimicrobium	7 days vs 14 days
47.4389	6.98178	1.18068	5.91337	3.3518e-09	9.77608e-08	4.86011e-08	Actinomycetota	Actinobacteria	Propionibacteriales	Propionibacteriaceae	Propionibacteriaceae_insertae_sedis_genus	7 days vs 14 days
16.5187	5.64972	1.81871	3.10645	0.0018935	0.0094675	0.00992377	Actinomycetota	Actinobacteria	Frankiales	Frankiales_unclassified	Frankiales_unclassified	7 days vs 14 days
19.3153	4.72865	1.45882	3.24143	0.00118931	0.00650407	0.0065281	Actinomycetota	Actinobacteria	Frankiales	Nakamurellaceae	Nakamurella	7 days vs 14 days
239.092	3.75885	0.899441	4.17909	2.92672e-05	0.000240349	0.000237967	Actinomycetota	Actinobacteria	Mycobacteriales	Mycobacteriaceae	Mycobacterium	7 days vs 14 days
59.4274	3.87907	1.19174	3.25498	0.00113402	0.00630011	0.00628406	Actinomycetota	Actinobacteria	Micrococcales	Demequinaceae	Demequina	7 days vs 14 days
18.549	5.90124	1.3745	4.29339	1.75969e-05	0.000166458	0.000151578	Actinomycetota	Actinobacteria	Micrococcales	Cellulomonadaceae	Cellulomonas	7 days vs 14 days
54.4889	6.35362	1.23914	5.12745	2.93695e-07	3.95358e-06	3.27583e-06	Actinomycetota	Thermoleophilia	Solirubrobacterales	67-14	67-14_insertae_sedis_genus	7 days vs 14 days
12.4764	4.98858	1.33262	3.74344	0.00018152	0.00124573	0.00124348	Actinomycetota	Thermoleophilia	Solirubrobacterales	Solirubrobacterales_unclassified	Solirubrobacterales_unclassified	7 days vs 14 days
33.6159	3.30455	1.07667	3.06924	0.00214602	0.0102891	0.011015	Actinomycetota	Thermoleophilia	Gaiellales	Gaiellaceae	Gaiella	7 days vs 14 days
54.789	3.74272	0.988127	3.78769	0.000152053	0.00108609	0.00105778	Gemmatimonadota	Gemmatimonadia	Gemmatimonadales	Gemmatimonadaceae	Gemmatimonadaceae_insertae_sedis_genus	7 days vs 14 days
7.89404	6.61227	2.0447	3.23387	0.00122126	0.00657604	0.00668239	Bacillota	Bacilli	Acholeplasmatales	Acholeplasmataceae	Acholeplasma	7 days vs 14 days
84.5555	4.43819	1.51597	2.92763	0.00341559	0.0151323	0.0168839	Bacillota	Clostridia	Peptostreptococcales-Tissierellales	Fusibacteraceae	Fusibacter	7 days vs 14 days
15.1357	5.36134	1.6714	3.20769	0.00133808	0.00709588	0.00725314	Bacillota	Negativicutes	Veillonellales-Selenomonadales	Sporomusaceae	Sporomusa	7 days vs 14 days
100.458	7.90922	1.01824	7.76758	8.00018e-15	1.40003e-12	2.09573e-13	Acidobacteriota	Acidobacteriae	Bryobacterales	Bryobacteraceae	Bryobacteraceae_unclassified	7 days vs 14 days
91.1658	6.14445	1.29309	4.75175	2.01665e-06	2.34397e-05	2.00513e-05	Acidobacteriota	Acidobacteriae	Bryobacterales	Bryobacteraceae	Paludibaculum	7 days vs 14 days
74.6243	4.71673	0.900625	5.23718	1.63053e-07	2.28274e-06	1.86515e-06	Nitrospirota	Nitrospiria	Nitrospirales	Nitrospiraceae	Nitrospira	7 days vs 14 days
21.8241	-24.2325	2.48942	-9.7342	2.15498e-22	1.03439e-20	1.17177e-20	Bacteroidota	Bacteroidia	Bacteroidales	Bacteroidaceae	Bacteroides	14 days vs 21 days
204.686	-27.6131	1.84552	-14.9622	1.29618e-50	4.97733e-48	4.5107e-48	Bacteroidota	Bacteroidia	Bacteroidales	Paludibacteraceae	Paludibacter	14 days vs 21 days
48.0163	-10.4293	1.56201	-6.6768	2.4421e-11	2.84172e-10	4.38068e-10	Bacteroidota	Bacteroidia	Bacteroidales	Tannerellaceae	Macellibacteroides	14 days vs 21 days
4.30232	5.75968	2.18965	2.63041	0.00852819	0.024439	0.038413	Bacteroidota	Bacteroidia	Sphingobacteriales	Sphingobacteriales_unclassified	Sphingobacteriales_unclassified	14 days vs 21 days
77.5463	-5.0058	0.765624	-6.53819	6.22663e-11	6.81256e-10	1.06219e-09	Bacteroidota	Bacteroidia	Sphingobacteriales	Sphingobacteriaceae	Sphingobacterium	14 days vs 21 days
60.0424	-3.55565	0.794271	-4.47662	7.58323e-06	4.34621e-05	7.09399e-05	Bacteroidota	Bacteroidia	Sphingobacteriales	Sphingobacteriaceae	Pedobacter	14 days vs 21 days
117.211	-4.21592	0.853166	-4.9415	7.75246e-07	5.13266e-06	8.27563e-06	Bacteroidota	Bacteroidia	Sphingobacteriales	Sphingobacteriaceae	Pedobacter	14 days vs 21 days
21.8378	-8.707	1.1211	-7.76648	8.06977e-15	1.47561e-13	2.09573e-13	Bacteroidota	Bacteroidia	Chitinophagales	Chitinophagales_insertae_sedis_family	Chitinophagales_insertae_sedis_genus	14 days vs 21 days
157.525	2.4998	0.677037	3.69226	0.000222267	0.000948339	0.00149901	Bacteroidota	Bacteroidia	Chitinophagales	Chitinophagaceae	Aurantisolimonas	14 days vs 21 days
111.042	-4.16437	0.430118	-9.68192	3.59906e-22	1.5356e-20	1.89769e-20	Bacteroidota	Bacteroidia	Chitinophagales	Chitinophagaceae	Taibaiella	14 days vs 21 days
9.40093	-6.691	2.02432	-3.30531	0.000948723	0.00334229	0.0053947	Bacteroidota	Bacteroidia	Chitinophagales	Chitinophagaceae	Pseudobacter	14 days vs 21 days
36.896	8.62815	1.05773	8.15723	3.42787e-16	7.74295e-15	1.0464e-14	Bacteroidota	Bacteroidia	Chitinophagales	Chitinophagaceae	Ferruginibacter	14 days vs 21 days
71.6298	-6.07778	1.12844	-5.38601	7.20399e-08	5.53266e-07	8.82743e-07	Bacteroidota	Bacteroidia	Chitinophagales	Chitinophagaceae	Terrimonas	14 days vs 21 days
39.4345	-1.45266	0.570253	-2.5474	0.0108529	0.0295569	0.0474474	Bacteroidota	Bacteroidia	Chitinophagales	Chitinophagaceae	Flavitalea	14 days vs 21 days
251.366	-4.87798	0.406463	-12.001	3.50904e-33	3.36868e-31	3.59161e-31	Bacteroidota	Bacteroidia	Chitinophagales	Chitinophagaceae	Flavihumibacter	14 days vs 21 days
10.2132	-6.89396	2.44185	-2.82326	0.00475384	0.0142615	0.0226002	Bacteroidota	Bacteroidia	Chitinophagales	Chitinophagaceae	Chitinophaga	14 days vs 21 days
34.649	-9.59784	1.43567	-6.68525	2.30525e-11	2.7663e-10	4.17827e-10	Bacteroidota	Bacteroidia	Chitinophagales	Chitinophagaceae	Chitinophagaceae_unclassified	14 days vs 21 days
132.31	5.51171	0.619859	8.89187	6.009e-19	1.77497e-17	2.37629e-17	Bacteroidota	Bacteroidia	Chitinophagales	Saprospiraceae	Saprospiraceae_insertae_sedis_genus	14 days vs 21 days
40.2892	8.94375	1.04322	8.57323	1.0062e-17	2.57587e-16	3.57304e-16	Bacteroidota	Bacteroidia	Bacteroidales	Prolixibacteraceae	Prolixibacteraceae_insertae_sedis_genus	14 days vs 21 days
123.376	-5.53894	1.11148	-4.9834	6.24768e-07	4.20897e-06	6.71048e-06	Bacteroidota	Bacteroidia	Flavobacteriales	Crocinitomicaceae	Fluviicola	14 days vs 21 days
285.856	-4.59691	0.597349	-7.69552	1.40924e-14	2.45977e-13	3.55374e-13	Bacteroidota	Bacteroidia	Flavobacteriales	Flavobacteriaceae	Lutibacter	14 days vs 21 days
2480.24	-1.34197	0.341975	-3.92417	8.70304e-05	0.000417746	0.000644395	Bacteroidota	Bacteroidia	Flavobacteriales	Flavobacteriaceae	Flavobacterium	14 days vs 21 days
321.692	-2.12621	0.626603	-3.39323	0.000690725	0.00255037	0.00406034	Bacteroidota	Bacteroidia	Flavobacteriales	Flavobacteriaceae	Mariniflexile	14 days vs 21 days
218.572	-3.44579	0.867023	-3.97428	7.05931e-05	0.000347535	0.000529448	Bacteroidota	Bacteroidia	Flavobacteriales	Flavobacteriaceae	Arenibacter	14 days vs 21 days
10.1365	-7.13399	2.13784	-3.337	0.000846878	0.00303926	0.00487937	Bacteroidota	Bacteroidia	Flavobacteriales	Weeksellaceae	Moheibacter	14 days vs 21 days
6.7125	5.7945	1.76983	3.27405	0.00106019	0.00366768	0.00595073	Bacteroidota	Bacteroidia	Flavobacteriales	Weeksellaceae	Weeksellaceae_unclassified	14 days vs 21 days
9.56984	-7.55771	2.04145	-3.70212	0.000213802	0.000922472	0.00144753	Bacteroidota	Bacteroidia	Cytophagales	Cytophagales_unclassified	Cytophagales_unclassified	14 days vs 21 days
19.4472	7.40651	1.41451	5.2361	1.64005e-07	1.18826e-06	1.86515e-06	Bacteroidota	Bacteroidia	Cytophagales	Microscillaceae	OLB12	14 days vs 21 days
167.72	-3.48547	0.405718	-8.59088	8.6309e-18	2.36733e-16	3.1287e-16	Bacteroidota	Bacteroidia	Cytophagales	Cytophagaceae	Cytophaga	14 days vs 21 days
312.41	-1.76779	0.524567	-3.37	0.000751677	0.00274899	0.00437431	Bacteroidota	Bacteroidia	Cytophagales	Cyclobacteriaceae	Algoriphagus	14 days vs 21 days
263.143	-6.20836	0.950106	-6.53439	6.38677e-11	6.81256e-10	1.07893e-09	Bacteroidota	Bacteroidia	Cytophagales	Spirosomataceae	Emticicia	14 days vs 21 days
71.8661	-5.09258	1.05248	-4.83865	1.30727e-06	8.36653e-06	1.33803e-05	Bacteroidota	Bacteroidia	Cytophagales	Spirosomataceae	Rhabdobacter	14 days vs 21 days
9.12287	-7.16232	2.15258	-3.32732	0.000876871	0.00311776	0.0050355	Bacteroidota	Bacteroidia	Cytophagales	Spirosomataceae	Fibrisoma	14 days vs 21 days
353.989	-6.09356	0.67994	-8.96191	3.19099e-19	1.02112e-17	1.29124e-17	Bacteroidota	Bacteroidia	Cytophagales	Spirosomataceae	Dyadobacter	14 days vs 21 days
19.7195	7.53633	1.09161	6.90385	5.06114e-12	6.70165e-11	9.89481e-11	Planctomycetota	vadinHA49	vadinHA49_insertae_sedis_order	vadinHA49_insertae_sedis_family	vadinHA49_insertae_sedis_genus	14 days vs 21 days
11.5377	3.95676	1.37423	2.87926	0.00398605	0.0123439	0.0193196	Planctomycetota	Phycisphaerae	Phycisphaerales	Phycisphaeraceae	SM1A02	14 days vs 21 days
20.6889	3.25802	1.01496	3.21001	0.00132729	0.0043938	0.00721715	Planctomycetota	Phycisphaerae	Phycisphaerales	Phycisphaeraceae	Phycisphaeraceae_unclassified	14 days vs 21 days
183.601	-2.27971	0.434061	-5.25206	1.5041e-07	1.11072e-06	1.75647e-06	Planctomycetota	Planctomycetes	Planctomycetales	Rubinisphaeraceae	Planctomicrobium	14 days vs 21 days
16.7023	-8.06824	1.60016	-5.04215	4.60319e-07	3.15647e-06	4.97487e-06	Planctomycetota	Planctomycetes	Planctomycetales	Rubinisphaeraceae	Rubinisphaera	14 days vs 21 days
52.0355	2.6179	0.723901	3.61638	0.000298747	0.00124694	0.00195421	Planctomycetota	Planctomycetes	Pirellulales	Pirellulaceae	Mariniblastus	14 days vs 21 days
53.9544	-6.10858	1.05376	-5.79691	6.7547e-09	5.89501e-08	9.63375e-08	Planctomycetota	Planctomycetes	Planctomycetales	Schlesneriaceae	Planctopirus	14 days vs 21 days
13.3434	3.27968	0.946958	3.46339	0.000533421	0.00200817	0.00318953	Planctomycetota	Planctomycetes	Gemmatales	Gemmataceae	Gemmataceae_unclassified	14 days vs 21 days
25.4899	3.3878	1.31176	2.58263	0.00980494	0.027087	0.0431914	Planctomycetota	Planctomycetes	Isosphaerales	Isosphaeraceae	Aquisphaera	14 days vs 21 days
144.286	2.7991	0.541227	5.17176	2.31902e-07	1.64908e-06	2.62019e-06	Acidobacteriota	Vicinamibacteria	Vicinamibacterales	Vicinamibacteraceae	Vicinamibacteraceae_insertae_sedis_genus	14 days vs 21 days
9.74607	6.72608	2.08712	3.22266	0.00127007	0.00424094	0.00692768	Verrucomicrobiota	Verrucomicrobiia	Pedosphaerales	Pedosphaeraceae	SH3-11	14 days vs 21 days
45.0317	2.63595	0.914608	2.88206	0.00395087	0.0123344	0.0192026	Verrucomicrobiota	Verrucomicrobiia	Pedosphaerales	Pedosphaeraceae	Oikopleura	14 days vs 21 days
180.069	2.12747	0.546104	3.89572	9.79057e-05	0.000442644	0.000707416	Verrucomicrobiota	Verrucomicrobiia	Pedosphaerales	Pedosphaeraceae	Pedosphaeraceae_insertae_sedis_genus	14 days vs 21 days
114.925	1.93859	0.645415	3.00363	0.00266782	0.00853701	0.0134551	Verrucomicrobiota	Verrucomicrobiia	Chthoniobacterales	Chthoniobacteraceae	Chthoniobacter	14 days vs 21 days
12.5128	-40.7164	3.16327	-12.8716	6.50419e-38	8.32536e-36	9.43107e-36	Verrucomicrobiota	Verrucomicrobiia	Chthoniobacterales	01D2Z36	01D2Z36_insertae_sedis_genus	14 days vs 21 days
746.003	-2.24788	0.531025	-4.2331	2.3049e-05	0.000119605	0.000190072	Verrucomicrobiota	Verrucomicrobiia	Chthoniobacterales	Terrimicrobiaceae	Terrimicrobium	14 days vs 21 days
125.745	-3.04962	0.662176	-4.60546	4.11554e-06	2.54898e-05	3.97836e-05	Verrucomicrobiota	Verrucomicrobiia	Verrucomicrobiales	Rubritaleaceae	Haloferula	14 days vs 21 days
2232.71	-1.35986	0.32996	-4.12129	3.76763e-05	0.000192903	0.000297985	Verrucomicrobiota	Verrucomicrobiia	Verrucomicrobiales	Rubritaleaceae	Luteolibacter	14 days vs 21 days
167.453	-2.30038	0.542721	-4.2386	2.24921e-05	0.000118314	0.000187255	Verrucomicrobiota	Verrucomicrobiia	Verrucomicrobiales	Rubritaleaceae	Luteolibacter	14 days vs 21 days
209.693	-3.67753	0.580782	-6.33203	2.41964e-10	2.44511e-09	3.89831e-09	Verrucomicrobiota	Verrucomicrobiia	Verrucomicrobiales	Verrucomicrobiaceae	Verrucomicrobium	14 days vs 21 days
231.446	-4.15167	0.490107	-8.47093	2.43435e-17	5.84245e-16	7.99203e-16	Verrucomicrobiota	Verrucomicrobiia	Verrucomicrobiales	Verrucomicrobiaceae	Prosthecobacter	14 days vs 21 days
48.9815	4.30665	1.10422	3.90017	9.61263e-05	0.000442644	0.000699832	Myxococcota	Polyangiia	Polyangiales	BIrii41	BIrii41_insertae_sedis_genus	14 days vs 21 days
25.1772	2.44278	0.897518	2.72171	0.00649453	0.0188932	0.0299747	Myxococcota	Polyangiia	Polyangiales	Sandaracinaceae	Sandaracinaceae_insertae_sedis_genus	14 days vs 21 days
151.932	2.2725	0.573048	3.96563	7.32016e-05	0.000355815	0.000546656	Pseudomonadota	Gammaproteobacteria	Pseudomonadales	Moraxellaceae	Moraxellaceae_insertae_sedis_genus	14 days vs 21 days
21.3851	-8.7423	1.38354	-6.31878	2.63636e-10	2.5958e-09	4.2085e-09	Pseudomonadota	Gammaproteobacteria	Burkholderiales	Rhodocyclaceae	Rhodocyclaceae_unclassified	14 days vs 21 days
187.381	-7.61281	0.961734	-7.91571	2.45837e-15	4.96849e-14	6.78978e-14	Pseudomonadota	Gammaproteobacteria	Burkholderiales	Comamonadaceae	Hydrogenophaga	14 days vs 21 days
405.775	0.951268	0.292085	3.25682	0.00112668	0.00382914	0.00626403	Pseudomonadota	Gammaproteobacteria	Burkholderiales	Comamonadaceae	Comamonadaceae_unclassified	14 days vs 21 days
119.571	10.5207	1.01143	10.4018	2.43227e-25	1.55665e-23	1.56746e-23	Pseudomonadota	Gammaproteobacteria	Burkholderiales	Rhodocyclaceae	Dechloromonas	14 days vs 21 days
95.7991	2.32858	0.570648	4.08059	4.49209e-05	0.000224021	0.000347385	Pseudomonadota	Gammaproteobacteria	Burkholderiales	SC-I-84	SC-I-84_insertae_sedis_genus	14 days vs 21 days
15.2563	7.51844	1.25741	5.9793	2.24099e-09	2.00125e-08	3.36148e-08	Pseudomonadota	Gammaproteobacteria	Burkholderiales	TRA3-20	TRA3-20_insertae_sedis_genus	14 days vs 21 days
95.2727	-3.37953	0.429556	-7.86748	3.61855e-15	6.94761e-14	9.83793e-14	Pseudomonadota	Gammaproteobacteria	Burkholderiales	Alcaligenaceae	Achromobacter	14 days vs 21 days
17.0292	-8.09904	1.40722	-5.75535	8.64637e-09	7.37824e-08	1.20358e-07	Pseudomonadota	Gammaproteobacteria	Burkholderiales	Chitinibacteraceae	Chitinibacteraceae_unclassified	14 days vs 21 days
11.6288	-8.42193	1.95929	-4.29846	1.71991e-05	9.30203e-05	0.000148887	Pseudomonadota	Gammaproteobacteria	Burkholderiales	Chitinibacteraceae	Formivibrio	14 days vs 21 days
97.4812	-3.14453	0.802037	-3.92067	8.83024e-05	0.000418619	0.000651043	Pseudomonadota	Gammaproteobacteria	Pseudomonadales	Moraxellaceae	Acinetobacter	14 days vs 21 days
106.781	3.02988	0.865734	3.49979	0.000465631	0.00182451	0.00286149	Pseudomonadota	Gammaproteobacteria	Pseudomonadales	Halieaceae	Kineobactrum	14 days vs 21 days
72.0112	-10.3144	1.42137	-7.25669	3.96689e-13	6.09314e-12	8.41754e-12	Pseudomonadota	Gammaproteobacteria	Enterobacterales	Alteromonadaceae	Rheinheimera	14 days vs 21 days
8.23367	-7.14049	2.32325	-3.07349	0.00211568	0.00691793	0.0109237	Pseudomonadota	Gammaproteobacteria	Lysobacterales	Rhodanobacteraceae	Dokdonella	14 days vs 21 days
38.9007	-2.10396	0.590762	-3.56144	0.000368833	0.00149086	0.00233371	Pseudomonadota	Gammaproteobacteria	Lysobacterales	Lysobacteraceae	Arenimonas	14 days vs 21 days
392.139	-2.18686	0.270707	-8.07836	6.56431e-16	1.40039e-14	1.93591e-14	Pseudomonadota	Gammaproteobacteria	Lysobacterales	Lysobacteraceae	Pseudoxanthomonas	14 days vs 21 days
52.1251	-8.86046	1.19293	-7.42748	1.10688e-13	1.848e-12	2.46918e-12	Pseudomonadota	Gammaproteobacteria	Lysobacterales	Lysobacteraceae	Stenotrophomonas	14 days vs 21 days
136.095	1.93258	0.655731	2.94721	0.00320655	0.0101762	0.0159411	Pseudomonadota	Gammaproteobacteria	Rickettsiellales	Rickettsiellaceae	Rickettsiella	14 days vs 21 days
228.94	-4.21116	0.789459	-5.33424	9.59451e-08	7.2241e-07	1.15134e-06	Pseudomonadota	Gammaproteobacteria	Pseudomonadales	Pseudomonadaceae	Pseudomonas	14 days vs 21 days
207.293	-2.07136	0.458109	-4.52155	6.13873e-06	3.62657e-05	5.8051e-05	Pseudomonadota	Gammaproteobacteria	Pseudomonadales	Pseudomonadaceae	Pseudomonas	14 days vs 21 days
225.394	5.94058	0.548516	10.8303	2.47376e-27	1.89985e-25	1.72174e-25	Pseudomonadota	Gammaproteobacteria	Rickettsiellales	Rickettsiellaceae	Aquicella	14 days vs 21 days
8.20817	-6.972	2.6563	-2.62471	0.00867235	0.024668	0.0388915	Pseudomonadota	Gammaproteobacteria	Enterobacterales	Aeromonadaceae	Aeromonadaceae_unclassified	14 days vs 21 days
106.487	-3.22412	0.824473	-3.91052	9.20968e-05	0.000431282	0.000673312	Pseudomonadota	Gammaproteobacteria	Enterobacterales	Aeromonadaceae	Aeromonas	14 days vs 21 days
77.3727	-5.68661	1.17365	-4.84524	1.26457e-06	8.23041e-06	1.30973e-05	Pseudomonadota	Gammaproteobacteria	Enterobacterales	Shewanellaceae	Shewanella	14 days vs 21 days
300.976	-5.54223	0.785214	-7.05824	1.68622e-12	2.49042e-11	3.53497e-11	Pseudomonadota	Gammaproteobacteria	Enterobacterales	Enterobacteriaceae	Enterobacteriaceae_unclassified	14 days vs 21 days
1326.83	-3.56497	0.571883	-6.23374	4.55426e-10	4.1639e-09	7.01276e-09	Pseudomonadota	Gammaproteobacteria	Pseudomonadales	Cellvibrionaceae	Cellvibrio	14 days vs 21 days
75.9371	2.22018	0.494292	4.49164	7.06778e-06	4.11216e-05	6.64753e-05	Pseudomonadota	Gammaproteobacteria	Steroidobacterales	Steroidobacteraceae	Steroidobacter	14 days vs 21 days
31.7811	2.74958	0.726093	3.78682	0.000152588	0.000673491	0.00105778	Pseudomonadota	Gammaproteobacteria	PLTA13	PLTA13_insertae_sedis_family	PLTA13_insertae_sedis_genus	14 days vs 21 days
11.0235	4.18818	1.07512	3.89554	9.79812e-05	0.000442644	0.000707416	Pseudomonadota	Gammaproteobacteria	R7C24	R7C24_insertae_sedis_family	R7C24_insertae_sedis_genus	14 days vs 21 days
48.6677	2.49218	0.683957	3.64377	0.000268673	0.00113374	0.00177753	Pseudomonadota	Gammaproteobacteria	CCM19a	CCM19a_insertae_sedis_family	CCM19a_insertae_sedis_genus	14 days vs 21 days
40.9858	4.37707	1.22242	3.58065	0.000342739	0.00140013	0.00219252	Pseudomonadota	Gammaproteobacteria	Gammaproteobacteria_unclassified	Gammaproteobacteria_unclassified	Gammaproteobacteria_unclassified	14 days vs 21 days
8.56416	-7.71948	2.5128	-3.07207	0.00212582	0.00691793	0.0109436	Cyanobacteriota	Sericytochromatia	Sericytochromatia_insertae_sedis_order	Sericytochromatia_insertae_sedis_family	Sericytochromatia_insertae_sedis_genus	14 days vs 21 days
13.4618	-7.47544	1.19674	-6.2465	4.19757e-10	3.93139e-09	6.52123e-09	Pseudomonadota	Alphaproteobacteria	Rickettsiales	SM2D12	SM2D12_insertae_sedis_genus	14 days vs 21 days
367.615	-11.2269	1.15076	-9.75607	1.73751e-22	9.53149e-21	9.75249e-21	Pseudomonadota	Alphaproteobacteria	Caulobacterales	Caulobacteraceae	Brevundimonas	14 days vs 21 days
33.2778	-3.34308	0.652197	-5.12588	2.96159e-07	2.06773e-06	3.28227e-06	Pseudomonadota	Alphaproteobacteria	Caulobacterales	Caulobacteraceae	Asticcacaulis	14 days vs 21 days
35.3517	-8.43424	1.74998	-4.81962	1.43832e-06	9.05434e-06	1.46264e-05	Pseudomonadota	Alphaproteobacteria	Hyphomicrobiales	Rhizobiaceae	Agrobacterium	14 days vs 21 days
488.678	-3.65158	0.403526	-9.04919	1.44032e-19	5.02803e-18	6.2654e-18	Pseudomonadota	Alphaproteobacteria	Hyphomicrobiales	Rhizobiaceae	Rhizobiaceae_unclassified	14 days vs 21 days
9.90385	-7.05397	2.02153	-3.48943	0.00048405	0.00187753	0.00293466	Pseudomonadota	Alphaproteobacteria	Hyphomicrobiales	Rhizobiaceae	Rhizobiaceae_unclassified	14 days vs 21 days
58.9737	-3.45321	0.773955	-4.46177	8.12872e-06	4.59034e-05	7.56362e-05	Pseudomonadota	Alphaproteobacteria	Hyphomicrobiales	Rhizobiaceae	Rhizobiaceae_unclassified	14 days vs 21 days
21.5038	-5.17619	1.26091	-4.10511	4.04119e-05	0.000204186	0.000316742	Pseudomonadota	Alphaproteobacteria	Hyphomicrobiales	Rhizobiaceae	Shinella	14 days vs 21 days
11.4571	-4.80665	1.24983	-3.84585	0.000120135	0.000536416	0.000849734	Pseudomonadota	Alphaproteobacteria	Micavibrionales	Micavibrionales_insertae_sedis_family	Micavibrionales_insertae_sedis_genus	14 days vs 21 days
12.6166	-7.27765	2.01652	-3.60902	0.000307355	0.00126908	0.0019954	Pseudomonadota	Alphaproteobacteria	Sphingomonadales	Sphingomonadaceae	Sphingomonas	14 days vs 21 days
9.62676	-5.39452	1.90699	-2.82882	0.004672	0.0141264	0.022272	Pseudomonadota	Alphaproteobacteria	Sphingomonadales	Sphingomonadaceae	Sphingomonadaceae_unclassified	14 days vs 21 days
80.1759	-3.86965	0.571508	-6.77095	1.27937e-11	1.58477e-10	2.39366e-10	Pseudomonadota	Alphaproteobacteria	Sphingomonadales	Sphingomonadaceae	Sphingopyxis	14 days vs 21 days
20.3305	-8.51581	1.15982	-7.34236	2.09863e-13	3.35782e-12	4.50818e-12	Pseudomonadota	Alphaproteobacteria	Sphingomonadales	Sphingomonadaceae	Sphingomonadaceae_unclassified	14 days vs 21 days
14.4896	-7.50528	2.44888	-3.06479	0.00217824	0.00702894	0.0111475	Pseudomonadota	Alphaproteobacteria	Caulobacterales	Hyphomonadaceae	Hyphomonas	14 days vs 21 days
32.6407	-4.0766	1.49085	-2.73442	0.00624896	0.0183176	0.0289952	Pseudomonadota	Alphaproteobacteria	Hyphomicrobiales	Kaistiaceae	Kaistia	14 days vs 21 days
205.67	-4.77627	0.494861	-9.65174	4.83278e-22	1.85579e-20	2.47325e-20	Pseudomonadota	Alphaproteobacteria	Hyphomicrobiales	Devosiaceae	Devosia	14 days vs 21 days
338.682	-4.74065	0.330831	-14.3295	1.4309e-46	2.74732e-44	3.5568e-44	Pseudomonadota	Alphaproteobacteria	Hyphomicrobiales	Devosiaceae	Devosia	14 days vs 21 days
29.6773	3.54818	1.37233	2.58551	0.00972348	0.0270566	0.0429412	Pseudomonadota	Alphaproteobacteria	Hyphomicrobiales	Hyphomicrobiales_unclassified	Hyphomicrobiales_unclassified	14 days vs 21 days
53.073	5.60923	0.98776	5.67874	1.35689e-08	1.13271e-07	1.84452e-07	Pseudomonadota	Alphaproteobacteria	Hyphomicrobiales	Xanthobacteraceae	Pseudolabrys	14 days vs 21 days
49.0211	1.81111	0.697359	2.5971	0.00940156	0.0263518	0.0417314	Pseudomonadota	Alphaproteobacteria	Hyphomicrobiales	Xanthobacteraceae	Pseudorhodoplanes	14 days vs 21 days
37.9471	-5.06232	1.44389	-3.50602	0.000454854	0.00180066	0.00280654	Pseudomonadota	Alphaproteobacteria	Rhodobacterales	Paracoccaceae	Paracoccaceae_unclassified	14 days vs 21 days
30.9334	-8.47958	1.22742	-6.90847	4.89898e-12	6.70165e-11	9.68662e-11	Pseudomonadota	Alphaproteobacteria	Rhodobacterales	Paracoccaceae	Pseudorhodobacter	14 days vs 21 days
52.9249	1.87804	0.545087	3.44539	0.000570231	0.00212591	0.00339795	Pseudomonadota	Alphaproteobacteria	Rhodobacterales	Paracoccaceae	Amaricoccus	14 days vs 21 days
5.80534	6.18939	1.65655	3.73632	0.000186737	0.000814851	0.0012742	Fibrobacterota	Fibrobacteria	Fibrobacterales	Fibrobacteraceae	possible_genus_04	14 days vs 21 days
8.06618	-7.11434	2.19456	-3.24182	0.00118771	0.00400071	0.0065281	Bacteria_unclassified	Bacteria_unclassified	Bacteria_unclassified	Bacteria_unclassified	Bacteria_unclassified	14 days vs 21 days
27.7557	-9.0731	1.37767	-6.58585	4.52294e-11	5.10826e-10	7.792e-10	Campylobacterota	Campylobacteria	Campylobacterales	Arcobacteraceae	Arcobacter	14 days vs 21 days
62.0033	3.79005	0.887416	4.27088	1.94703e-05	0.000103841	0.00016607	Bdellovibrionota	Oligoflexia	Oligoflexales	Oligoflexaceae	Oligoflexus	14 days vs 21 days
8.34676	6.44037	1.16568	5.52497	3.2954e-08	2.58252e-07	4.2474e-07	Bdellovibrionota	Oligoflexia	Oligoflexales	Oligoflexaceae	Oligoflexaceae_insertae_sedis_genus	14 days vs 21 days
5.57047	-6.64815	1.91268	-3.47583	0.000509274	0.00195561	0.00306622	Candidatus_Eremiobacterota	Eremiobacteria	Eremiobacteria_insertae_sedis_order	Eremiobacteria_insertae_sedis_family	Eremiobacteria_insertae_sedis_genus	14 days vs 21 days
18.3093	5.49842	0.872533	6.30168	2.94444e-10	2.82666e-09	4.63893e-09	Chloroflexota	OLB14	OLB14_insertae_sedis_order	OLB14_insertae_sedis_family	OLB14_insertae_sedis_genus	14 days vs 21 days
2.30145	4.86513	1.86447	2.60939	0.00907051	0.0256109	0.0404684	Chloroflexota	Anaerolineae	Ardenticatenales	Ardenticatenales_insertae_sedis_family	Ardenticatenales_insertae_sedis_genus	14 days vs 21 days
5.02548	5.78393	1.27352	4.5417	5.58023e-06	3.36343e-05	5.33003e-05	Chloroflexota	Anaerolineae	Anaerolineales	Anaerolineaceae	Anaerolinea	14 days vs 21 days
20.2652	1.82987	0.716368	2.55437	0.010638	0.0291785	0.046625	Chloroflexota	Anaerolineae	RBG-13-54-9	RBG-13-54-9_insertae_sedis_family	RBG-13-54-9_insertae_sedis_genus	14 days vs 21 days
11.4621	3.55147	0.802078	4.42784	9.51826e-06	5.22144e-05	8.67108e-05	Chloroflexota	Anaerolineae	Aggregatilineales	A4b	OLB15	14 days vs 21 days
6.04422	4.35108	1.56075	2.78782	0.00530642	0.0157958	0.0250901	Chloroflexota	Dehalococcoidia	S085	S085_insertae_sedis_family	S085_insertae_sedis_genus	14 days vs 21 days
10.7087	3.37795	1.25934	2.68233	0.00731119	0.021109	0.0332153	Actinomycetota	Acidimicrobiia	Acidimicrobiia_unclassified	Acidimicrobiia_unclassified	Acidimicrobiia_unclassified	14 days vs 21 days
11.3769	4.11366	1.22819	3.34937	0.000809967	0.00293422	0.0046822	Actinomycetota	Acidimicrobiia	Microtrichales	Ilumatobacteraceae	Ilumatobacteraceae_insertae_sedis_genus	14 days vs 21 days
42.0133	1.98569	0.679625	2.92174	0.00348081	0.010956	0.0171575	Actinomycetota	Acidimicrobiia	Acidimicrobiales	Acidimicrobiaceae	Acidiferrimicrobium	14 days vs 21 days
17.917	-8.35724	1.48897	-5.61277	1.99119e-08	1.62684e-07	2.66513e-07	Actinomycetota	Actinobacteria	Micrococcales	Cellulomonadaceae	Actinotalea	14 days vs 21 days
54.4889	2.41576	0.840004	2.8759	0.00402882	0.0123765	0.0194726	Actinomycetota	Thermoleophilia	Solirubrobacterales	67-14	67-14_insertae_sedis_genus	14 days vs 21 days
7.94532	6.65123	2.04227	3.25679	0.00112681	0.00382914	0.00626403	Gemmatimonadota	Gemmatimonadia	Gemmatimonadales	Gemmatimonadaceae	Gemmatimonas	14 days vs 21 days
54.789	3.29678	0.588373	5.60321	2.10412e-08	1.6833e-07	2.79479e-07	Gemmatimonadota	Gemmatimonadia	Gemmatimonadales	Gemmatimonadaceae	Gemmatimonadaceae_insertae_sedis_genus	14 days vs 21 days
15.7128	3.22444	1.15769	2.78523	0.00534904	0.0158002	0.025155	Patescibacteria	Saccharimonadia	Saccharimonadales	Saccharimonadales_unclassified	Saccharimonadales_unclassified	14 days vs 21 days
84.5555	-11.3394	1.75836	-6.44884	1.12707e-10	1.16971e-09	1.85009e-09	Bacillota	Clostridia	Peptostreptococcales-Tissierellales	Fusibacteraceae	Fusibacter	14 days vs 21 days
30.6039	-5.5269	1.68137	-3.28713	0.00101213	0.00353326	0.00569938	Bacillota	Bacilli	Exiguobacterales	Exiguobacteraceae	Exiguobacterium	14 days vs 21 days
128.976	-7.26785	1.06105	-6.84966	7.40259e-12	9.47531e-11	1.41544e-10	Abditibacteriota	Abditibacteriia	Abditibacteriales	Abditibacteriaceae	Abditibacterium	14 days vs 21 days
7.43836	5.85167	1.2887	4.54074	5.60572e-06	3.36343e-05	5.33003e-05	Patescibacteria	Parcubacteria	Parcubacteria_unclassified	Parcubacteria_unclassified	Parcubacteria_unclassified	14 days vs 21 days
5.65875	5.91718	1.6737	3.53538	0.000407186	0.00162874	0.00254857	Patescibacteria	Microgenomatia	Microgenomatia_insertae_sedis_order	Microgenomatia_insertae_sedis_family	Microgenomatia_insertae_sedis_genus	14 days vs 21 days
100.458	1.29479	0.454143	2.85106	0.00435743	0.0132798	0.0208295	Acidobacteriota	Acidobacteriae	Bryobacterales	Bryobacteraceae	Bryobacteraceae_unclassified	14 days vs 21 days
91.1658	3.18092	0.917262	3.46784	0.000524662	0.00199475	0.00314797	Acidobacteriota	Acidobacteriae	Bryobacterales	Bryobacteraceae	Paludibaculum	14 days vs 21 days
74.6243	2.88312	0.408946	7.05012	1.7876e-12	2.54236e-11	3.6701e-11	Nitrospirota	Nitrospiria	Nitrospirales	Nitrospiraceae	Nitrospira	14 days vs 21 days
118.575	3.81713	0.862028	4.42808	9.50759e-06	5.22144e-05	8.67108e-05	Acidobacteriota	Blastocatellia	Blastocatellales	Blastocatellaceae	Blastocatellaceae_insertae_sedis_genus	14 days vs 21 days
21.8241	22.5399	2.4917	9.046	1.48306e-19	3.22566e-17	6.29398e-18	Bacteroidota	Bacteroidia	Bacteroidales	Bacteroidaceae	Bacteroides	21 days vs 28 days
251.366	1.42089	0.416053	3.41517	0.000637413	0.0628145	0.00375965	Bacteroidota	Bacteroidia	Chitinophagales	Chitinophagaceae	Flavihumibacter	21 days vs 28 days
285.856	1.55335	0.600324	2.58752	0.00966682	0.665951	0.0427997	Bacteroidota	Bacteroidia	Flavobacteriales	Flavobacteriaceae	Lutibacter	21 days vs 28 days
12.5128	36.1109	3.23962	11.1466	7.43542e-29	3.23441e-26	5.88074e-27	Verrucomicrobiota	Verrucomicrobiia	Chthoniobacterales	01D2Z36	01D2Z36_insertae_sedis_genus	21 days vs 28 days
187.381	3.43822	0.968511	3.55	0.000385225	0.0558576	0.00242859	Pseudomonadota	Gammaproteobacteria	Burkholderiales	Comamonadaceae	Hydrogenophaga	21 days vs 28 days
35.3517	5.95223	1.76045	3.38108	0.000722005	0.0628145	0.00422993	Pseudomonadota	Alphaproteobacteria	Hyphomicrobiales	Rhizobiaceae	Agrobacterium	21 days vs 28 days

## Sheet: Supplementary Table S3
Supplementary Table S3. Differential abundance in bacterial amplicon sequence variants (ASVs) during vermicomposting of seaweeds analyzed using negative binomial models as implemented in the package DESeq2 (Love et al., 2014)
Positive log2FoldChange imply increase in the second vs the first day in comparison column
baseMean	log2FoldChange	lfcSE	stat	pvalue	padj	padj	Phylum	Class	Order	Family	Genus	ASV	Comparison
132.303	8.70624	2.3305	3.73578	0.000187136	0.00117516	0.0026728	Bacteroidota	Bacteroidia	Bacteroidales	Paludibacteraceae	Paludibacter	ASV38	0 days vs 7 days
37.7745	6.64514	1.95059	3.40673	0.000657453	0.00359996	0.00802123	Bacteroidota	Bacteroidia	Bacteroidales	Tannerellaceae	Macellibacteroides	ASV155	0 days vs 7 days
15.6592	6.2605	1.82199	3.43608	0.000590204	0.00335445	0.00740313	Bacteroidota	Bacteroidia	Sphingobacteriales	Sphingobacteriaceae	Sphingobacterium	ASV350	0 days vs 7 days
10.1373	8.32472	1.74505	4.77047	1.83792e-06	1.89707e-05	4.2068e-05	Bacteroidota	Bacteroidia	Sphingobacteriales	Sphingobacteriaceae	Sphingobacterium	ASV481	0 days vs 7 days
44.8306	10.6464	1.25649	8.47308	2.38988e-17	1.19228e-15	3.36847e-15	Bacteroidota	Bacteroidia	Sphingobacteriales	Sphingobacteriaceae	Pedobacter	ASV122	0 days vs 7 days
13.4215	8.57706	1.72203	4.98078	6.33276e-07	7.06024e-06	1.6075e-05	Bacteroidota	Bacteroidia	Sphingobacteriales	Sphingobacteriaceae	Pedobacter	ASV399	0 days vs 7 days
12.4215	6.28446	1.61661	3.88744	0.000101306	0.000689191	0.00153977	Bacteroidota	Bacteroidia	Chitinophagales	Chitinophagales_insertae_sedis_family	Chitinophagales_insertae_sedis_genus	ASV418	0 days vs 7 days
31.2249	9.06948	1.35597	6.68857	2.25357e-11	4.93586e-10	1.28405e-09	Bacteroidota	Bacteroidia	Chitinophagales	Chitinophagaceae	Taibaiella	ASV183	0 days vs 7 days
10.6934	7.70754	2.25359	3.42011	0.000625954	0.00351316	0.00777867	Bacteroidota	Bacteroidia	Chitinophagales	Chitinophagaceae	Taibaiella	ASV433	0 days vs 7 days
689.247	8.1252	1.18542	6.85427	7.16785e-12	1.71025e-10	4.45542e-10	Bacteroidota	Bacteroidia	Chitinophagales	Chitinophagaceae	Agriterribacter	ASV2	0 days vs 7 days
22.3591	7.3332	1.86271	3.93684	8.25616e-05	0.000579221	0.00128546	Bacteroidota	Bacteroidia	Chitinophagales	Chitinophagaceae	Agriterribacter	ASV272	0 days vs 7 days
58.4564	8.37124	1.0992	7.61574	2.6219e-14	1.07021e-12	2.55326e-12	Bacteroidota	Bacteroidia	Chitinophagales	Chitinophagaceae	Chitinophagaceae_unclassified	ASV93	0 days vs 7 days
48.8194	10.1101	1.64797	6.13484	8.52441e-10	1.41758e-08	3.71193e-08	Bacteroidota	Bacteroidia	Chitinophagales	Chitinophagaceae	Terrimonas	ASV117	0 days vs 7 days
17.7743	7.71786	2.01902	3.82258	0.000132062	0.000854073	0.00193991	Bacteroidota	Bacteroidia	Chitinophagales	Chitinophagaceae	Flavitalea	ASV325	0 days vs 7 days
172.747	11.7582	1.01188	11.6201	3.25574e-31	7.30913e-29	2.90629e-28	Bacteroidota	Bacteroidia	Chitinophagales	Chitinophagaceae	Flavihumibacter	ASV25	0 days vs 7 days
20.2322	8.4928	2.93273	2.89587	0.00378108	0.0170624	0.0355289	Bacteroidota	Bacteroidia	Chitinophagales	Chitinophagaceae	Flavihumibacter	ASV297	0 days vs 7 days
27.0014	8.30173	1.59538	5.2036	1.95462e-07	2.36135e-06	5.50997e-06	Bacteroidota	Bacteroidia	Chitinophagales	Chitinophagaceae	Chitinophagaceae_unclassified	ASV217	0 days vs 7 days
10.3171	7.71209	2.70999	2.8458	0.00442996	0.0194675	0.0407678	Bacteroidota	Bacteroidia	Chitinophagales	Chitinophagaceae	Chitinophagaceae_unclassified	ASV508	0 days vs 7 days
38.8419	9.76832	1.58646	6.15731	7.39911e-10	1.25366e-08	3.24833e-08	Bacteroidota	Bacteroidia	Chitinophagales	Saprospiraceae	OLB8	ASV132	0 days vs 7 days
8.32561	5.69197	1.6612	3.42641	0.000611617	0.00345429	0.00761819	Bacteroidota	Bacteroidia	Flavobacteriales	Crocinitomicaceae	Crocinitomicaceae_unclassified	ASV534	0 days vs 7 days
74.8868	10.6658	2.33044	4.57673	4.72307e-06	4.51204e-05	9.99872e-05	Bacteroidota	Bacteroidia	Flavobacteriales	Crocinitomicaceae	Fluviicola	ASV78	0 days vs 7 days
9.6278	-7.91248	2.72484	-2.90384	0.00368622	0.0168032	0.0348208	Bacteroidota	Bacteroidia	Flavobacteriales	Flavobacteriaceae	Maribacter	ASV313	0 days vs 7 days
161.155	6.87016	1.23091	5.58136	2.38643e-08	3.19852e-07	7.79372e-07	Bacteroidota	Bacteroidia	Flavobacteriales	Flavobacteriaceae	Lutibacter	ASV33	0 days vs 7 days
14.2872	8.02088	2.5694	3.12169	0.00179816	0.00868143	0.0188472	Bacteroidota	Bacteroidia	Flavobacteriales	Flavobacteriaceae	Flavobacterium	ASV384	0 days vs 7 days
28.0579	8.69046	2.12671	4.08633	4.38249e-05	0.000330712	0.000733519	Bacteroidota	Bacteroidia	Flavobacteriales	Flavobacteriaceae	Flavobacterium	ASV208	0 days vs 7 days
119.517	9.7846	1.89217	5.17109	2.32739e-07	2.71428e-06	6.39256e-06	Bacteroidota	Bacteroidia	Flavobacteriales	Flavobacteriaceae	Flavobacterium	ASV40	0 days vs 7 days
179.57	21.965	2.40304	9.14048	6.21757e-20	5.58338e-18	1.38755e-17	Bacteroidota	Bacteroidia	Flavobacteriales	Flavobacteriaceae	Flavobacterium	ASV29	0 days vs 7 days
21.5347	7.4154	1.6894	4.38938	1.13676e-05	9.54028e-05	0.000217446	Bacteroidota	Bacteroidia	Flavobacteriales	Flavobacteriaceae	Flavobacterium	ASV254	0 days vs 7 days
10.4388	20.6955	4.35337	4.7539	1.99529e-06	2.0361e-05	4.54756e-05	Bacteroidota	Bacteroidia	Flavobacteriales	Flavobacteriaceae	Flavobacterium	ASV425	0 days vs 7 days
47.8969	9.86809	1.26932	7.77429	7.58688e-15	3.24429e-13	8.46569e-13	Bacteroidota	Bacteroidia	Flavobacteriales	Flavobacteriaceae	Flavobacterium	ASV118	0 days vs 7 days
18.4699	20.6126	2.91032	7.08258	1.41492e-12	4.09869e-11	1.03812e-10	Bacteroidota	Bacteroidia	Flavobacteriales	Flavobacteriaceae	Flavobacterium	ASV311	0 days vs 7 days
425.389	8.3146	1.29423	6.42435	1.32438e-10	2.37859e-09	6.33339e-09	Bacteroidota	Bacteroidia	Flavobacteriales	Flavobacteriaceae	Flavobacterium	ASV3	0 days vs 7 days
22.3322	20.9808	4.65446	4.50768	6.55405e-06	5.94498e-05	0.000133983	Bacteroidota	Bacteroidia	Flavobacteriales	Flavobacteriaceae	Flavobacterium	ASV274	0 days vs 7 days
31.843	8.78814	2.67262	3.28821	0.00100827	0.00511542	0.0116386	Bacteroidota	Bacteroidia	Flavobacteriales	Flavobacteriaceae	Flavobacterium	ASV198	0 days vs 7 days
89.4521	10.8745	1.45832	7.45682	8.86369e-14	3.46069e-12	7.78261e-12	Bacteroidota	Bacteroidia	Flavobacteriales	Flavobacteriaceae	Flavobacterium	ASV59	0 days vs 7 days
24.3036	9.52565	1.78695	5.33067	9.78533e-08	1.25532e-06	2.91168e-06	Bacteroidota	Bacteroidia	Flavobacteriales	Flavobacteriaceae	Flavobacterium	ASV252	0 days vs 7 days
113.999	7.08511	1.52472	4.64681	3.37101e-06	3.25502e-05	7.36945e-05	Bacteroidota	Bacteroidia	Flavobacteriales	Flavobacteriaceae	Flavobacterium	ASV46	0 days vs 7 days
194.541	11.4199	1.28393	8.8945	5.86855e-19	3.76426e-17	1.04773e-16	Bacteroidota	Bacteroidia	Flavobacteriales	Flavobacteriaceae	Flavobacterium	ASV24	0 days vs 7 days
20.1196	8.80944	1.27127	6.92963	4.21939e-12	1.0525e-10	2.72278e-10	Bacteroidota	Bacteroidia	Flavobacteriales	Flavobacteriaceae	Flavobacterium	ASV301	0 days vs 7 days
65.5136	10.0488	1.48427	6.77023	1.28582e-11	2.96068e-10	7.56797e-10	Bacteroidota	Bacteroidia	Flavobacteriales	Flavobacteriaceae	Flavobacterium	ASV82	0 days vs 7 days
24.4606	9.03098	1.31783	6.85289	7.23715e-12	1.71025e-10	4.45542e-10	Bacteroidota	Bacteroidia	Flavobacteriales	Flavobacteriaceae	Flavobacterium	ASV231	0 days vs 7 days
18.011	-8.81606	2.37437	-3.71301	0.000204805	0.00127719	0.00290194	Bacteroidota	Bacteroidia	Flavobacteriales	Flavobacteriaceae	Dokdonia	ASV174	0 days vs 7 days
17.9612	-8.81218	2.4113	-3.65453	0.000257652	0.00157396	0.00358438	Bacteroidota	Bacteroidia	Flavobacteriales	Flavobacteriaceae	Flavobacteriaceae_unclassified	ASV163	0 days vs 7 days
10.9788	-8.10181	2.62618	-3.08502	0.00203538	0.00967076	0.0209431	Bacteroidota	Bacteroidia	Flavobacteriales	Flavobacteriaceae	Hyunsoonleella	ASV293	0 days vs 7 days
189.046	9.57342	1.34131	7.13736	9.51384e-13	3.05123e-11	7.27945e-11	Bacteroidota	Bacteroidia	Flavobacteriales	Flavobacteriaceae	Mariniflexile	ASV21	0 days vs 7 days
38.0955	9.55671	1.68627	5.66736	1.45017e-08	2.06707e-07	5.07654e-07	Bacteroidota	Bacteroidia	Flavobacteriales	Flavobacteriaceae	Mariniflexile	ASV151	0 days vs 7 days
30.1117	20.8018	2.96049	7.02646	2.11838e-12	5.94469e-11	1.47351e-10	Bacteroidota	Bacteroidia	Flavobacteriales	Flavobacteriaceae	Flavobacteriaceae_unclassified	ASV200	0 days vs 7 days
9.2614	-7.85651	2.71682	-2.89181	0.0038303	0.017198	0.0359283	Bacteroidota	Bacteroidia	Flavobacteriales	Flavobacteriaceae	Flavobacteriaceae_unclassified	ASV322	0 days vs 7 days
165.987	6.09592	0.980684	6.21599	5.10036e-10	8.98063e-09	2.27646e-08	Bacteroidota	Bacteroidia	Flavobacteriales	Flavobacteriaceae	Arenibacter	ASV30	0 days vs 7 days
21.4495	8.45035	1.75728	4.80877	1.5186e-06	1.60435e-05	3.58308e-05	Bacteroidota	Bacteroidia	Flavobacteriales	Flavobacteriaceae	Arenibacter	ASV276	0 days vs 7 days
21.9784	-9.10337	2.30896	-3.94263	8.05942e-05	0.000574394	0.00126273	Bacteroidota	Bacteroidia	Flavobacteriales	Flavobacteriaceae	Croceitalea	ASV126	0 days vs 7 days
21.9028	-9.09837	2.28547	-3.98096	6.86372e-05	0.000501107	0.00109411	Bacteroidota	Bacteroidia	Flavobacteriales	Flavobacteriaceae	Croceitalea	ASV133	0 days vs 7 days
12.252	-8.26026	2.59797	-3.17951	0.00147524	0.00727895	0.0159947	Bacteroidota	Bacteroidia	Flavobacteriales	Flavobacteriaceae	Maribacter	ASV237	0 days vs 7 days
20.9195	-9.0321	2.29788	-3.93062	8.47279e-05	0.000589811	0.00131537	Bacteroidota	Bacteroidia	Flavobacteriales	Flavobacteriaceae	Maribacter	ASV139	0 days vs 7 days
17.4267	-8.76845	2.3789	-3.68592	0.000227876	0.00141126	0.00319504	Bacteroidota	Bacteroidia	Flavobacteriales	Flavobacteriaceae	Maribacter	ASV179	0 days vs 7 days
301.925	19.533	1.52779	12.7851	1.98544e-37	8.91462e-35	2.6585e-34	Bacteroidota	Bacteroidia	Cytophagales	Microscillaceae	Chryseolinea	ASV9	0 days vs 7 days
257.843	5.49191	1.61029	3.41051	0.000648416	0.0035943	0.0079654	Bacteroidota	Bacteroidia	Cytophagales	Microscillaceae	Microscillaceae_unclassified	ASV11	0 days vs 7 days
58.1772	5.32628	1.58216	3.36646	0.0007614	0.00409424	0.00910281	Bacteroidota	Bacteroidia	Cytophagales	Microscillaceae	Microscillaceae_unclassified	ASV96	0 days vs 7 days
190.23	8.19086	1.18171	6.93137	4.16776e-12	1.0525e-10	2.72226e-10	Bacteroidota	Bacteroidia	Cytophagales	Microscillaceae	Hassallia	ASV23	0 days vs 7 days
22.9816	8.11681	2.06842	3.92417	8.70298e-05	0.000601175	0.0013472	Bacteroidota	Bacteroidia	Cytophagales	Cytophagaceae	Cytophaga	ASV230	0 days vs 7 days
136.272	9.71467	1.4598	6.65478	2.83728e-11	6.06638e-10	1.59963e-09	Bacteroidota	Bacteroidia	Cytophagales	Cyclobacteriaceae	Algoriphagus	ASV35	0 days vs 7 days
188.076	11.9964	1.33831	8.96386	3.13502e-19	2.16557e-17	5.99684e-17	Bacteroidota	Bacteroidia	Cytophagales	Spirosomataceae	Emticicia	ASV20	0 days vs 7 days
9.95362	7.5117	2.27031	3.30866	0.000937423	0.00483797	0.0109865	Bacteroidota	Bacteroidia	Cytophagales	Spirosomataceae	Spirosomataceae_insertae_sedis_genus	ASV461	0 days vs 7 days
23.8463	7.58319	1.80855	4.19295	2.75345e-05	0.000215118	0.000483771	Bacteroidota	Bacteroidia	Cytophagales	Spirosomataceae	Rhabdobacter	ASV245	0 days vs 7 days
6.96995	7.22686	2.35678	3.06641	0.00216642	0.0102392	0.0221097	Bacteroidota	Bacteroidia	Cytophagales	Spirosomataceae	Fibrisoma	ASV597	0 days vs 7 days
59.2	9.30684	1.87357	4.96744	6.78436e-07	7.4297e-06	1.69799e-05	Bacteroidota	Bacteroidia	Cytophagales	Spirosomataceae	Dyadobacter	ASV98	0 days vs 7 days
93.7641	9.71746	1.21736	7.98238	1.4354e-15	6.78413e-14	1.7879e-13	Bacteroidota	Bacteroidia	Cytophagales	Spirosomataceae	Dyadobacter	ASV53	0 days vs 7 days
70.3403	9.9893	1.1127	8.97753	2.76917e-19	2.07226e-17	5.49321e-17	Bacteroidota	Bacteroidia	Cytophagales	Spirosomataceae	Dyadobacter	ASV74	0 days vs 7 days
19.077	9.53783	1.99566	4.77928	1.75924e-06	1.83698e-05	4.06142e-05	Bacteroidota	Bacteroidia	Cytophagales	Spirosomataceae	Dyadobacter	ASV303	0 days vs 7 days
76.5487	4.19236	1.502	2.79117	0.00525172	0.0225648	0.0468023	Planctomycetota	Planctomycetes	Planctomycetales	Rubinisphaeraceae	SH-PL14	ASV68	0 days vs 7 days
39.0393	8.00193	1.29261	6.19053	5.99637e-10	1.03553e-08	2.65426e-08	Planctomycetota	Planctomycetes	Planctomycetales	Rubinisphaeraceae	Planctomicrobium	ASV156	0 days vs 7 days
31.0031	6.29144	1.76121	3.57222	0.000353968	0.00214773	0.00473963	Planctomycetota	Planctomycetes	Planctomycetales	Rubinisphaeraceae	Planctomicrobium	ASV193	0 days vs 7 days
11.0645	7.82174	1.88379	4.15213	3.29398e-05	0.000254999	0.000567284	Planctomycetota	Planctomycetes	Planctomycetales	Rubinisphaeraceae	Rubinisphaera	ASV473	0 days vs 7 days
27.9949	5.47001	1.30461	4.19284	2.75486e-05	0.000215118	0.000483771	Planctomycetota	Planctomycetes	Pirellulales	Pirellulaceae	Pir4_lineage	ASV215	0 days vs 7 days
28.5872	7.80799	1.37526	5.67748	1.36694e-08	2.01231e-07	4.92383e-07	Planctomycetota	Planctomycetes	Pirellulales	Pirellulaceae	Pirellula	ASV204	0 days vs 7 days
31.5681	7.75422	1.47408	5.26038	1.43756e-07	1.76839e-06	4.13954e-06	Planctomycetota	Planctomycetes	Pirellulales	Pirellulaceae	Pirellulaceae_insertae_sedis_genus	ASV186	0 days vs 7 days
8.81992	7.91467	2.3985	3.29984	0.000967398	0.00496414	0.0112394	Planctomycetota	Planctomycetes	Pirellulales	Pirellulaceae	Novipirellula	ASV502	0 days vs 7 days
31.1604	-9.60691	2.15867	-4.45039	8.57153e-06	7.54631e-05	0.000171944	Planctomycetota	Planctomycetes	Pirellulales	Pirellulaceae	Mariniblastus	ASV91	0 days vs 7 days
25.6386	7.45527	1.41481	5.26945	1.36829e-07	1.70657e-06	3.98293e-06	Planctomycetota	Planctomycetes	Planctomycetales	Schlesneriaceae	Planctopirus	ASV229	0 days vs 7 days
228.57	5.74904	1.3055	4.40369	1.06425e-05	9.01604e-05	0.000205782	Planctomycetota	Planctomycetes	Planctomycetales	Planctomycetales_insertae_sedis_family	Planctomycetales_insertae_sedis_genus	ASV15	0 days vs 7 days
228.868	6.04323	1.32656	4.55556	5.22456e-06	4.93858e-05	0.000109736	Planctomycetota	Planctomycetes	Gemmatales	Gemmataceae	Gemmataceae_unclassified	ASV14	0 days vs 7 days
30.5655	5.23374	1.29991	4.02623	5.66791e-05	0.000420643	0.000922715	Planctomycetota	Planctomycetes	Isosphaerales	Isosphaeraceae	Isosphaeraceae_insertae_sedis_genus	ASV203	0 days vs 7 days
59.7459	5.21996	1.39706	3.73638	0.000186685	0.00117516	0.0026728	Acidobacteriota	Vicinamibacteria	Vicinamibacterales	Vicinamibacterales_insertae_sedis_family	Vicinamibacterales_insertae_sedis_genus	ASV94	0 days vs 7 days
49.0299	4.65507	1.38467	3.36187	0.000774175	0.00413112	0.00923492	Verrucomicrobiota	Verrucomicrobiia	Pedosphaerales	Pedosphaeraceae	Oikopleura	ASV116	0 days vs 7 days
30.5087	8.596	1.4638	5.87237	4.29608e-09	6.58146e-08	1.71555e-07	Verrucomicrobiota	Verrucomicrobiia	Chthoniobacterales	Terrimicrobiaceae	Terrimicrobium	ASV194	0 days vs 7 days
202.231	9.42802	1.32974	7.0901	1.34014e-12	4.01147e-11	9.96912e-11	Verrucomicrobiota	Verrucomicrobiia	Chthoniobacterales	Terrimicrobiaceae	Terrimicrobium	ASV19	0 days vs 7 days
94.5127	10.4968	2.04566	5.13122	2.87873e-07	3.31423e-06	7.82663e-06	Verrucomicrobiota	Verrucomicrobiia	Chthoniobacterales	Terrimicrobiaceae	Terrimicrobium	ASV55	0 days vs 7 days
42.2744	8.59997	2.10456	4.08635	4.3822e-05	0.000330712	0.000733519	Verrucomicrobiota	Verrucomicrobiia	Chthoniobacterales	Terrimicrobiaceae	Terrimicrobium	ASV142	0 days vs 7 days
17.5699	8.49756	1.75034	4.85482	1.20497e-06	1.28817e-05	2.92029e-05	Verrucomicrobiota	Verrucomicrobiia	Chthoniobacterales	Terrimicrobiaceae	Terrimicrobium	ASV335	0 days vs 7 days
21.0597	6.96106	1.53842	4.5248	6.0453e-06	5.59658e-05	0.000125014	Verrucomicrobiota	Verrucomicrobiia	Chthoniobacterales	Terrimicrobiaceae	Terrimicrobium	ASV284	0 days vs 7 days
24.8095	8.55528	1.71803	4.9797	6.36837e-07	7.06024e-06	1.60892e-05	Verrucomicrobiota	Verrucomicrobiia	Chthoniobacterales	Terrimicrobiaceae	Terrimicrobium	ASV244	0 days vs 7 days
72.4704	9.34183	2.10506	4.4378	9.08837e-06	7.84746e-05	0.000178961	Verrucomicrobiota	Verrucomicrobiia	Chthoniobacterales	Terrimicrobiaceae	Terrimicrobium	ASV77	0 days vs 7 days
17.4888	7.32117	1.92429	3.80462	0.000142025	0.000910986	0.00206708	Verrucomicrobiota	Verrucomicrobiia	Chthoniobacterales	Chthoniobacteraceae	Chthoniobacteraceae_unclassified	ASV330	0 days vs 7 days
10.2272	7.82061	2.03148	3.84971	0.00011826	0.000775163	0.00174972	Verrucomicrobiota	Verrucomicrobiia	Chthoniobacterales	Chthoniobacteraceae	Chthoniobacteraceae_unclassified	ASV449	0 days vs 7 days
9.49935	8.5566	2.99607	2.85594	0.00429096	0.0190757	0.0397619	Verrucomicrobiota	Verrucomicrobiia	Verrucomicrobiales	Rubritaleaceae	Haloferula	ASV453	0 days vs 7 days
92.6362	7.4977	1.23586	6.0668	1.30483e-09	2.13042e-08	5.50287e-08	Verrucomicrobiota	Verrucomicrobiia	Verrucomicrobiales	Rubritaleaceae	Haloferula	ASV54	0 days vs 7 days
11.9854	-8.22852	2.63825	-3.11893	0.00181507	0.00871621	0.0189873	Verrucomicrobiota	Verrucomicrobiia	Verrucomicrobiales	Rubritaleaceae	Haloferula	ASV246	0 days vs 7 days
281.686	9.91598	1.04187	9.51748	1.77422e-21	1.89175e-19	5.9392e-19	Verrucomicrobiota	Verrucomicrobiia	Verrucomicrobiales	Rubritaleaceae	Luteolibacter	ASV10	0 days vs 7 days
23.4566	8.56369	2.15386	3.97598	7.00897e-05	0.000507585	0.00111395	Verrucomicrobiota	Verrucomicrobiia	Verrucomicrobiales	Rubritaleaceae	Luteolibacter	ASV249	0 days vs 7 days
240.574	9.75271	1.33062	7.32946	2.31078e-13	8.64616e-12	1.93383e-11	Verrucomicrobiota	Verrucomicrobiia	Verrucomicrobiales	Rubritaleaceae	Luteolibacter	ASV12	0 days vs 7 days
358.213	8.83794	1.35338	6.53027	6.56531e-11	1.31014e-09	3.38113e-09	Verrucomicrobiota	Verrucomicrobiia	Verrucomicrobiales	Rubritaleaceae	Luteolibacter	ASV4	0 days vs 7 days
69.2518	10.1933	1.792	5.6882	1.28389e-08	1.92155e-07	4.70993e-07	Verrucomicrobiota	Verrucomicrobiia	Verrucomicrobiales	Rubritaleaceae	Luteolibacter	ASV79	0 days vs 7 days
97.0005	5.21398	1.35227	3.85571	0.000115393	0.000767578	0.00172157	Verrucomicrobiota	Verrucomicrobiia	Verrucomicrobiales	Rubritaleaceae	Luteolibacter	ASV51	0 days vs 7 days
312.822	6.38098	1.46448	4.35717	1.31755e-05	0.000109552	0.000249356	Verrucomicrobiota	Verrucomicrobiia	Verrucomicrobiales	Rubritaleaceae	Luteolibacter	ASV8	0 days vs 7 days
32.4864	9.44894	1.7738	5.32695	9.98759e-08	1.26322e-06	2.95544e-06	Verrucomicrobiota	Verrucomicrobiia	Verrucomicrobiales	Rubritaleaceae	Luteolibacter	ASV177	0 days vs 7 days
63.7851	10.8819	1.51036	7.20487	5.81002e-13	2.00669e-11	4.57624e-11	Verrucomicrobiota	Verrucomicrobiia	Verrucomicrobiales	Rubritaleaceae	Luteolibacter	ASV92	0 days vs 7 days
98.5599	10.5257	2.02431	5.19962	1.99691e-07	2.36135e-06	5.54602e-06	Verrucomicrobiota	Verrucomicrobiia	Verrucomicrobiales	Rubritaleaceae	Luteolibacter	ASV50	0 days vs 7 days
58.6172	21.4607	2.47798	8.66058	4.6937e-18	2.63434e-16	7.39396e-16	Verrucomicrobiota	Verrucomicrobiia	Verrucomicrobiales	Rubritaleaceae	Luteolibacter	ASV100	0 days vs 7 days
77.6282	10.5787	1.08287	9.76912	1.52771e-22	1.95983e-20	5.45493e-20	Verrucomicrobiota	Verrucomicrobiia	Verrucomicrobiales	Rubritaleaceae	Luteolibacter	ASV65	0 days vs 7 days
54.7307	4.48314	1.27428	3.51817	0.00043454	0.00260145	0.0057325	Verrucomicrobiota	Verrucomicrobiia	Verrucomicrobiales	Verrucomicrobiales_unclassified	Verrucomicrobiales_unclassified	ASV107	0 days vs 7 days
11.2624	-8.13873	2.60554	-3.12363	0.00178637	0.00867113	0.0187604	Verrucomicrobiota	Verrucomicrobiia	Verrucomicrobiales	Rubritaleaceae	Roseibacillus	ASV269	0 days vs 7 days
11.6637	-8.18921	2.60002	-3.14967	0.00163455	0.00802089	0.0174048	Verrucomicrobiota	Verrucomicrobiia	Verrucomicrobiales	Rubritaleaceae	Roseibacillus	ASV261	0 days vs 7 days
38.0184	7.73538	1.39538	5.54357	2.96374e-08	3.91388e-07	9.62048e-07	Verrucomicrobiota	Verrucomicrobiia	Verrucomicrobiales	Verrucomicrobiaceae	Verrucomicrobium	ASV161	0 days vs 7 days
22.2634	8.88684	1.70918	5.19948	1.99847e-07	2.36135e-06	5.54602e-06	Verrucomicrobiota	Verrucomicrobiia	Verrucomicrobiales	Verrucomicrobiaceae	Verrucomicrobium	ASV259	0 days vs 7 days
38.456	9.99325	1.76169	5.67254	1.40694e-08	2.03779e-07	4.95761e-07	Verrucomicrobiota	Verrucomicrobiia	Verrucomicrobiales	Verrucomicrobiaceae	Verrucomicrobium	ASV168	0 days vs 7 days
9.07731	8.69762	2.84606	3.05602	0.00224297	0.0105455	0.0227958	Verrucomicrobiota	Verrucomicrobiia	Verrucomicrobiales	Verrucomicrobiaceae	Phragmitibacter	ASV492	0 days vs 7 days
23.1188	9.26034	1.42566	6.49549	8.27641e-11	1.6157e-09	4.18193e-09	Verrucomicrobiota	Verrucomicrobiia	Verrucomicrobiales	Verrucomicrobiaceae	Phragmitibacter	ASV233	0 days vs 7 days
30.491	6.49245	1.84689	3.51535	0.000439179	0.00261181	0.00577947	Verrucomicrobiota	Verrucomicrobiia	Verrucomicrobiales	Verrucomicrobiaceae	Prosthecobacter	ASV187	0 days vs 7 days
9.38809	20.2372	2.8465	7.10951	1.16458e-12	3.60619e-11	8.78521e-11	Verrucomicrobiota	Verrucomicrobiia	Verrucomicrobiales	Verrucomicrobiaceae	Prosthecobacter	ASV539	0 days vs 7 days
119.744	10.7815	1.66718	6.46691	1.00026e-10	1.91114e-09	4.96055e-09	Verrucomicrobiota	Verrucomicrobiia	Verrucomicrobiales	Verrucomicrobiaceae	Prosthecobacter	ASV39	0 days vs 7 days
24.5403	8.52742	1.22804	6.9439	3.8143e-12	1.00743e-10	2.52215e-10	Myxococcota	Myxococcia	Myxococcales	Myxococcaceae	Corallococcus	ASV228	0 days vs 7 days
12.4777	-8.28657	2.57668	-3.21598	0.00129998	0.00652169	0.0145663	Pseudomonadota	Gammaproteobacteria	Granulosicoccales	Granulosicoccaceae	Granulosicoccus	ASV235	0 days vs 7 days
9.67451	-7.91957	2.73386	-2.89685	0.00376933	0.0170624	0.0354808	Pseudomonadota	Gammaproteobacteria	Granulosicoccales	Granulosicoccaceae	Granulosicoccus	ASV304	0 days vs 7 days
87.2775	5.28279	1.56604	3.37333	0.000742642	0.00401743	0.00891837	Pseudomonadota	Gammaproteobacteria	Gammaproteobacteria_unclassified	Gammaproteobacteria_unclassified	Gammaproteobacteria_unclassified	ASV57	0 days vs 7 days
27.5239	5.70064	1.27396	4.47475	7.64992e-06	6.80161e-05	0.000154034	Pseudomonadota	Gammaproteobacteria	Burkholderiales	Comamonadaceae	Comamonadaceae_unclassified	ASV201	0 days vs 7 days
30.4985	9.54695	2.04429	4.67005	3.01124e-06	2.97153e-05	6.72008e-05	Pseudomonadota	Gammaproteobacteria	Burkholderiales	Comamonadaceae	Comamonadaceae_unclassified	ASV182	0 days vs 7 days
200.539	6.81268	1.49642	4.55264	5.29765e-06	4.95551e-05	0.000110837	Pseudomonadota	Gammaproteobacteria	Burkholderiales	Comamonadaceae	Comamonadaceae_unclassified	ASV18	0 days vs 7 days
78.6579	6.33865	0.666483	9.51058	1.89597e-21	1.89175e-19	5.97341e-19	Pseudomonadota	Gammaproteobacteria	Burkholderiales	Alcaligenaceae	Achromobacter	ASV64	0 days vs 7 days
17.1507	-5.10746	1.29706	-3.93773	8.22572e-05	0.000579221	0.00128446	Pseudomonadota	Gammaproteobacteria	Burkholderiales	Chitinibacteraceae	Chitinibacteraceae_unclassified	ASV219	0 days vs 7 days
19.8418	-8.90459	2.55801	-3.48106	0.000499436	0.00287496	0.006369	Pseudomonadota	Gammaproteobacteria	Pseudomonadales	Moraxellaceae	Acinetobacter	ASV149	0 days vs 7 days
13.5986	7.10261	2.53463	2.80223	0.00507506	0.0220165	0.0455311	Pseudomonadota	Gammaproteobacteria	Enterobacterales	Alteromonadaceae	Rheinheimera	ASV393	0 days vs 7 days
11.3039	8.69765	2.95304	2.94532	0.00322616	0.0148569	0.0310779	Pseudomonadota	Gammaproteobacteria	Lysobacterales	Lysobacteraceae	Arenimonas	ASV447	0 days vs 7 days
223.904	12.3422	1.01992	12.1011	1.04211e-33	3.11937e-31	1.1163e-30	Pseudomonadota	Gammaproteobacteria	Lysobacterales	Lysobacteraceae	Pseudoxanthomonas	ASV16	0 days vs 7 days
20.0442	22.732	2.85796	7.95395	1.80656e-15	8.11146e-14	2.19908e-13	Pseudomonadota	Gammaproteobacteria	Lysobacterales	Lysobacteraceae	Pseudoxanthomonas	ASV287	0 days vs 7 days
52.7024	5.55426	1.41829	3.91618	8.99646e-05	0.000616704	0.00138463	Pseudomonadota	Gammaproteobacteria	Lysobacterales	Lysobacteraceae	Pseudoxanthomonas	ASV115	0 days vs 7 days
27.1638	9.54704	1.7003	5.6149	1.96672e-08	2.7171e-07	6.62501e-07	Pseudomonadota	Gammaproteobacteria	Lysobacterales	Lysobacteraceae	Stenotrophomonas	ASV227	0 days vs 7 days
75.0205	9.97708	1.76649	5.64797	1.62352e-08	2.278e-07	5.61003e-07	Pseudomonadota	Gammaproteobacteria	Rickettsiellales	Rickettsiellaceae	Rickettsiella	ASV70	0 days vs 7 days
65.1548	7.84397	1.81445	4.32306	1.5388e-05	0.00012449	0.000283234	Pseudomonadota	Gammaproteobacteria	Rickettsiellales	Rickettsiellaceae	Rickettsiella	ASV72	0 days vs 7 days
38.1008	4.28254	1.46299	2.92725	0.00341977	0.0156681	0.0325393	Pseudomonadota	Gammaproteobacteria	Pseudomonadales	Pseudomonadaceae	Pseudomonadaceae_unclassified	ASV138	0 days vs 7 days
93.0566	3.37272	0.845356	3.9897	6.61579e-05	0.000486966	0.00105774	Pseudomonadota	Gammaproteobacteria	Pseudomonadales	Pseudomonadaceae	Pseudomonas	ASV49	0 days vs 7 days
33.229	5.89232	1.7533	3.3607	0.00077746	0.00413112	0.00925351	Pseudomonadota	Gammaproteobacteria	Pseudomonadales	Pseudomonadaceae	Pseudomonadaceae_unclassified	ASV171	0 days vs 7 days
47.4241	4.10441	1.03479	3.96643	7.29574e-05	0.000524126	0.00115609	Pseudomonadota	Gammaproteobacteria	Pseudomonadales	Pseudomonadaceae	Pseudomonas	ASV119	0 days vs 7 days
22.5698	5.89758	1.69327	3.48295	0.000495919	0.00287313	0.00633924	Pseudomonadota	Gammaproteobacteria	Pseudomonadales	Pseudomonadaceae	Pseudomonas	ASV240	0 days vs 7 days
25.2548	-9.30356	2.43401	-3.82232	0.000132201	0.000854073	0.00193991	Pseudomonadota	Gammaproteobacteria	Enterobacterales	Vibrionaceae	Vibrio	ASV137	0 days vs 7 days
121.489	-5.42462	0.919487	-5.89962	3.6435e-09	5.74011e-08	1.46726e-07	Pseudomonadota	Gammaproteobacteria	Enterobacterales	Aeromonadaceae	Aeromonas	ASV17	0 days vs 7 days
83.7653	-11.0336	1.87924	-5.87129	4.32412e-09	6.58146e-08	1.71555e-07	Pseudomonadota	Gammaproteobacteria	Enterobacterales	Shewanellaceae	Shewanella	ASV31	0 days vs 7 days
15.2468	-8.5757	2.44563	-3.50654	0.000453965	0.00266445	0.00588144	Pseudomonadota	Gammaproteobacteria	Enterobacterales	Enterobacteriaceae	Salmonella	ASV197	0 days vs 7 days
8.19188	20.6136	4.65511	4.42818	9.50322e-06	8.12752e-05	0.000186444	Pseudomonadota	Gammaproteobacteria	Pseudomonadales	Cellvibrionaceae	Cellvibrio	ASV503	0 days vs 7 days
931.575	9.37762	0.666691	14.0659	6.15072e-45	5.52334e-42	1.64716e-41	Pseudomonadota	Gammaproteobacteria	Pseudomonadales	Cellvibrionaceae	Cellvibrio	ASV1	0 days vs 7 days
20.7602	5.55603	1.36682	4.06494	4.8044e-05	0.00035953	0.000795838	Pseudomonadota	Gammaproteobacteria	Pseudomonadales	Cellvibrionaceae	Cellvibrio	ASV294	0 days vs 7 days
25.1498	8.17352	1.36368	5.9937	2.05114e-09	3.28914e-08	8.45068e-08	Pseudomonadota	Alphaproteobacteria	Reyranellales	Reyranellaceae	Reyranella	ASV232	0 days vs 7 days
5.56319	7.39719	1.91296	3.86689	0.000110233	0.000744283	0.00166313	Bdellovibrionota	Bdellovibrionia	Bdellovibrionales	Pseudobdellovibrionaceae	Bdellovibrio	ASV700	0 days vs 7 days
3.93692	6.79261	2.38319	2.85022	0.00436892	0.0193265	0.0402753	Pseudomonadota	Alphaproteobacteria	Rickettsiales	SM2D12	SM2D12_insertae_sedis_genus	ASV869	0 days vs 7 days
190.523	12.6375	1.12245	11.2588	2.0965e-29	3.13776e-27	1.24765e-26	Pseudomonadota	Alphaproteobacteria	Caulobacterales	Caulobacteraceae	Brevundimonas	ASV22	0 days vs 7 days
9.8741	7.64336	2.58872	2.95256	0.00315149	0.0145969	0.0304323	Pseudomonadota	Alphaproteobacteria	Caulobacterales	Caulobacteraceae	Caulobacteraceae_unclassified	ASV450	0 days vs 7 days
16.5131	7.98155	1.71344	4.6582	3.18979e-06	3.11352e-05	7.05972e-05	Pseudomonadota	Alphaproteobacteria	Caulobacterales	Caulobacteraceae	Asticcacaulis	ASV347	0 days vs 7 days
25.507	9.40608	1.84966	5.0853	3.6704e-07	4.17218e-06	9.78044e-06	Pseudomonadota	Alphaproteobacteria	Hyphomicrobiales	Rhizobiaceae	Agrobacterium	ASV226	0 days vs 7 days
7.5665	7.6388	2.68594	2.844	0.00445516	0.0194675	0.0409204	Pseudomonadota	Alphaproteobacteria	Hyphomicrobiales	Rhizobiaceae	Rhizobiaceae_unclassified	ASV559	0 days vs 7 days
51.0248	10.5957	1.5659	6.76654	1.31897e-11	2.9611e-10	7.67872e-10	Pseudomonadota	Alphaproteobacteria	Hyphomicrobiales	Rhizobiaceae	Agrobacterium	ASV111	0 days vs 7 days
171.303	6.58774	0.998143	6.59999	4.11174e-11	8.39168e-10	2.20225e-09	Pseudomonadota	Alphaproteobacteria	Hyphomicrobiales	Rhizobiaceae	Rhizobiaceae_unclassified	ASV26	0 days vs 7 days
14.0908	8.7344	1.78153	4.90274	9.45072e-07	1.0225e-05	2.33263e-05	Pseudomonadota	Alphaproteobacteria	Hyphomicrobiales	Rhizobiaceae	Endobacterium	ASV383	0 days vs 7 days
7.25708	7.36637	2.23408	3.29727	0.000976281	0.00498125	0.0113181	Pseudomonadota	Alphaproteobacteria	Hyphomicrobiales	Rhizobiaceae	Rhizobiaceae_unclassified	ASV600	0 days vs 7 days
22.5977	9.19554	2.4992	3.67939	0.000233794	0.00143799	0.00326094	Pseudomonadota	Alphaproteobacteria	Hyphomicrobiales	Rhizobiaceae	Rhizobiaceae_unclassified	ASV253	0 days vs 7 days
9.86693	7.71015	1.80408	4.27374	1.92221e-05	0.00015412	0.000348995	Pseudomonadota	Alphaproteobacteria	Hyphomicrobiales	Rhizobiaceae	Shinella	ASV495	0 days vs 7 days
12.665	7.08623	1.71069	4.14231	3.43819e-05	0.000263888	0.000590222	Pseudomonadota	Alphaproteobacteria	Hyphomicrobiales	Rhizobiaceae	Rhizobiaceae_unclassified	ASV407	0 days vs 7 days
23.9461	7.45466	1.3326	5.59407	2.21809e-08	3.01795e-07	7.33339e-07	Pseudomonadota	Alphaproteobacteria	Hyphomicrobiales	Rhizobiaceae	Pararhizobium	ASV270	0 days vs 7 days
5.64408	6.65929	1.72892	3.8517	0.000117302	0.00077454	0.00174036	Pseudomonadota	Alphaproteobacteria	Micavibrionales	Micavibrionaceae	Micavibrionaceae_insertae_sedis_genus	ASV697	0 days vs 7 days
8.59827	7.78643	2.19495	3.54742	0.000389017	0.00234454	0.00518302	Pseudomonadota	Alphaproteobacteria	Sphingomonadales	Sphingomonadaceae	Sphingomonas	ASV533	0 days vs 7 days
44.2762	9.81371	1.0896	9.00668	2.12387e-19	1.73385e-17	4.37518e-17	Pseudomonadota	Alphaproteobacteria	Sphingomonadales	Sphingomonadaceae	Sphingopyxis	ASV130	0 days vs 7 days
14.893	7.97427	1.23492	6.4573	1.06591e-10	1.99205e-09	5.23761e-09	Pseudomonadota	Alphaproteobacteria	Sphingomonadales	Sphingomonadaceae	Sphingomonadaceae_unclassified	ASV376	0 days vs 7 days
13.3029	-8.37896	2.52701	-3.31576	0.000913953	0.00477168	0.0107822	Pseudomonadota	Alphaproteobacteria	Caulobacterales	Hyphomonadaceae	Hyphomonadaceae_unclassified	ASV224	0 days vs 7 days
18.5853	7.59996	2.00169	3.79678	0.000146589	0.000933598	0.00212773	Pseudomonadota	Alphaproteobacteria	Hyphomicrobiales	Kaistiaceae	Kaistia	ASV327	0 days vs 7 days
66.3486	9.77188	1.10894	8.81195	1.22985e-18	7.3627e-17	2.05846e-16	Pseudomonadota	Alphaproteobacteria	Hyphomicrobiales	Devosiaceae	Devosia	ASV83	0 days vs 7 days
35.2811	9.02913	1.39893	6.45433	1.08698e-10	1.99205e-09	5.2926e-09	Pseudomonadota	Alphaproteobacteria	Hyphomicrobiales	Devosiaceae	Devosia	ASV175	0 days vs 7 days
53.4376	10.3739	1.45028	7.15304	8.48744e-13	2.82286e-11	6.58822e-11	Pseudomonadota	Alphaproteobacteria	Hyphomicrobiales	Devosiaceae	Devosiaceae_unclassified	ASV105	0 days vs 7 days
41.7609	9.96635	1.16269	8.57181	1.01871e-17	5.38119e-16	1.55892e-15	Pseudomonadota	Alphaproteobacteria	Hyphomicrobiales	Devosiaceae	Devosia	ASV140	0 days vs 7 days
21.4303	7.18436	1.5295	4.6972	2.63753e-06	2.63167e-05	5.9606e-05	Pseudomonadota	Alphaproteobacteria	Hyphomicrobiales	Devosiaceae	Devosia	ASV298	0 days vs 7 days
47.5572	8.10497	1.16439	6.96072	3.38529e-12	9.21209e-11	2.26645e-10	Pseudomonadota	Alphaproteobacteria	Hyphomicrobiales	Devosiaceae	Devosia	ASV121	0 days vs 7 days
122.564	11.699	1.03686	11.2832	1.58905e-29	2.85394e-27	1.06387e-26	Pseudomonadota	Alphaproteobacteria	Hyphomicrobiales	Devosiaceae	Devosia	ASV41	0 days vs 7 days
37.7501	9.27919	1.69942	5.46022	4.75542e-08	6.18894e-07	1.47226e-06	Pseudomonadota	Alphaproteobacteria	Rhodobacterales	Paracoccaceae	Fuscovulum	ASV158	0 days vs 7 days
16.7444	5.57383	1.72562	3.23004	0.00123773	0.0062443	0.0139271	Pseudomonadota	Alphaproteobacteria	Rhodobacterales	Paracoccaceae	Paracoccaceae_unclassified	ASV334	0 days vs 7 days
21.6752	7.17693	1.58958	4.51498	6.33227e-06	5.80242e-05	0.000129945	Pseudomonadota	Alphaproteobacteria	Rhodobacterales	Paracoccaceae	Gemmobacter	ASV283	0 days vs 7 days
126.696	5.94018	1.39646	4.25375	2.10215e-05	0.000167056	0.000377824	Pseudomonadota	Alphaproteobacteria	Rhodobacterales	Paracoccaceae	Paracoccaceae_unclassified	ASV42	0 days vs 7 days
8.87801	-7.79562	2.78415	-2.8	0.00511027	0.0220626	0.04577	Pseudomonadota	Alphaproteobacteria	Rhodobacterales	Paracoccaceae	Yoonia	ASV321	0 days vs 7 days
13.562	-8.40685	2.5258	-3.3284	0.000873476	0.00458703	0.0103275	Pseudomonadota	Alphaproteobacteria	Rhodobacterales	Paracoccaceae	Sulfitobacter	ASV214	0 days vs 7 days
40.478	3.92767	1.27119	3.08977	0.00200311	0.00956804	0.0207117	Pseudomonadota	Alphaproteobacteria	Rhodobacterales	Paracoccaceae	Amaricoccus	ASV146	0 days vs 7 days
14.1364	-8.46668	2.50457	-3.38049	0.000723573	0.00393799	0.0087285	Pseudomonadota	Alphaproteobacteria	Rhodobacterales	Paracoccaceae	Paracoccaceae_unclassified	ASV207	0 days vs 7 days
9.24992	-7.85478	2.76262	-2.84324	0.00446581	0.0194675	0.0409204	Pseudomonadota	Alphaproteobacteria	Rhodobacterales	Paracoccaceae	Paracoccaceae_unclassified	ASV317	0 days vs 7 days
15.7642	-8.59053	2.4488	-3.50805	0.0004514	0.00266445	0.00588144	Pseudomonadota	Alphaproteobacteria	Rhodobacterales	Paracoccaceae	Paracoccaceae_unclassified	ASV191	0 days vs 7 days
15.2015	-8.57131	2.58656	-3.31379	0.0009204	0.00477757	0.0108344	Pseudomonadota	Alphaproteobacteria	Alphaproteobacteria_unclassified	Alphaproteobacteria_unclassified	Alphaproteobacteria_unclassified	ASV210	0 days vs 7 days
22.4561	7.42071	1.70619	4.34929	1.36582e-05	0.000112524	0.000255781	Pseudomonadota	Alphaproteobacteria	Acetobacterales	Acetobacteraceae	Roseomonas	ASV277	0 days vs 7 days
12.1908	-8.25304	2.57245	-3.20825	0.00133547	0.00662569	0.0148706	Campylobacterota	Campylobacteria	Campylobacterales	Arcobacteraceae	Arcobacter	ASV241	0 days vs 7 days
10.7795	-8.06584	2.30472	-3.4997	0.00046578	0.00271604	0.00599692	Actinomycetota	Acidimicrobiia	Microtrichales	Microtrichaceae	Microtrichaceae_insertae_sedis_genus	ASV286	0 days vs 7 days
123.996	6.33126	1.34623	4.70296	2.56418e-06	2.58723e-05	5.81938e-05	Actinomycetota	Actinobacteria	Mycobacteriales	Mycobacteriaceae	Mycobacterium	ASV43	0 days vs 7 days
13.0936	4.09063	1.38554	2.95237	0.00315346	0.0145969	0.0304323	Actinomycetota	Actinobacteria	Micrococcales	Cellulomonadaceae	Actinotalea	ASV394	0 days vs 7 days
65.5732	5.32682	1.58801	3.3544	0.000795384	0.0042015	0.00942495	Actinomycetota	Actinobacteria	Micrococcales	Demequinaceae	Demequina	ASV84	0 days vs 7 days
19.0221	6.97762	2.33234	2.99167	0.00277452	0.0129767	0.0275191	Actinomycetota	Actinobacteria	Micrococcales	Microbacteriaceae	Galbitalea	ASV326	0 days vs 7 days
17.7548	7.80805	2.29151	3.40739	0.000655884	0.00359996	0.00802036	Actinomycetota	Actinobacteria	Micrococcales	Microbacteriaceae	Microbacteriaceae_unclassified	ASV337	0 days vs 7 days
15.016	7.48899	2.32995	3.21423	0.00130793	0.00652512	0.0146248	Actinomycetota	Actinobacteria	Micrococcales	Microbacteriaceae	Microbacteriaceae_unclassified	ASV358	0 days vs 7 days
31.4307	-9.61943	2.16558	-4.44196	8.91425e-06	7.77184e-05	0.000176977	Bacillota	Clostridia	Peptostreptococcales-Tissierellales	Peptostreptococcaceae	Proteocatella	ASV86	0 days vs 7 days
65.9316	6.56855	1.89058	3.47436	0.000512064	0.00292888	0.00649909	Bacillota	Clostridia	Peptostreptococcales-Tissierellales	Fusibacteraceae	Fusibacter	ASV85	0 days vs 7 days
20.383	-8.99454	2.33062	-3.8593	0.000113712	0.000762043	0.0017108	Bacillota	Clostridia	Peptostreptococcales-Tissierellales	Peptostreptococcaceae	Terrisporobacter	ASV153	0 days vs 7 days
161.389	-11.978	1.80824	-6.62411	3.49335e-11	7.29542e-10	1.88994e-09	Bacillota	Clostridia	Clostridiales	Clostridiaceae	Clostridium	ASV6	0 days vs 7 days
11.9496	-8.22425	2.61336	-3.147	0.00164956	0.00805058	0.017499	Bacillota	Clostridia	Clostridiales	Clostridiaceae	Clostridium	ASV242	0 days vs 7 days
54.161	-10.4043	2.31527	-4.49378	6.99688e-06	6.28319e-05	0.000142492	Bacillota	Clostridia	Clostridiales	Clostridiaceae	Clostridium	ASV61	0 days vs 7 days
28.9004	-9.4983	2.19452	-4.32818	1.50344e-05	0.000122735	0.000279598	Bacillota	Clostridia	Clostridiales	Clostridiaceae	Clostridium	ASV103	0 days vs 7 days
9.33191	-7.86732	2.72628	-2.88573	0.00390504	0.0174464	0.036505	Bacillota	Clostridia	Clostridiales	Clostridiaceae	Clostridium	ASV333	0 days vs 7 days
88.8344	9.47599	1.30114	7.28282	3.26908e-13	1.17425e-11	2.69372e-11	Abditibacteriota	Abditibacteriia	Abditibacteriales	Abditibacteriaceae	Abditibacterium	ASV58	0 days vs 7 days
141.895	4.65084	1.36226	3.41406	0.000640017	0.00356978	0.00789334	Acidobacteriota	Blastocatellia	Blastocatellales	Blastocatellaceae	Blastocatellaceae_insertae_sedis_genus	ASV34	0 days vs 7 days
16.7013	7.52898	1.66073	4.53352	5.80076e-06	7.26737e-05	0.000120891	Bacteroidota	Bacteroidia	Sphingobacteriales	Sphingobacteriaceae	Pedobacter	ASV348	7 days vs 14 days
74.9671	5.16025	1.45767	3.54007	0.000400023	0.00301836	0.00531644	Bacteroidota	Bacteroidia	Chitinophagales	Chitinophagaceae	Aurantisolimonas	ASV67	7 days vs 14 days
50.9208	6.44236	1.61385	3.99192	6.55401e-05	0.000604425	0.001051	Bacteroidota	Bacteroidia	Chitinophagales	Chitinophagaceae	Dinghuibacter	ASV112	7 days vs 14 days
689.247	3.84222	0.7575	5.07223	3.93171e-07	7.05583e-06	1.03227e-05	Bacteroidota	Bacteroidia	Chitinophagales	Chitinophagaceae	Agriterribacter	ASV2	7 days vs 14 days
71.3295	6.57664	1.15678	5.6853	1.30584e-08	4.12895e-07	4.75788e-07	Bacteroidota	Bacteroidia	Chitinophagales	Chitinophagaceae	Chitinophagaceae_insertae_sedis_genus	ASV73	7 days vs 14 days
58.4564	2.4941	0.614899	4.05611	4.98964e-05	0.000480162	0.000822292	Bacteroidota	Bacteroidia	Chitinophagales	Chitinophagaceae	Chitinophagaceae_unclassified	ASV93	7 days vs 14 days
7.04863	32.5253	4.14784	7.8415	4.45201e-15	7.39034e-13	5.0734e-13	Bacteroidota	Bacteroidia	Chitinophagales	Chitinophagaceae	Terrimonas	ASV671	7 days vs 14 days
17.3289	4.71449	1.5359	3.06953	0.00214394	0.0116687	0.0219559	Bacteroidota	Bacteroidia	Chitinophagales	Saprospiraceae	Saprospiraceae_insertae_sedis_genus	ASV332	7 days vs 14 days
12.2319	5.67441	1.48994	3.80849	0.000139819	0.00119025	0.00204051	Bacteroidota	Bacteroidia	Flavobacteriales	NS9_marine_group	NS9_marine_group_insertae_sedis_genus	ASV426	7 days vs 14 days
161.155	5.83534	0.826607	7.05939	1.67231e-12	1.00947e-10	1.19425e-10	Bacteroidota	Bacteroidia	Flavobacteriales	Flavobacteriaceae	Lutibacter	ASV33	7 days vs 14 days
69.3146	9.43437	1.30516	7.22851	4.88306e-13	3.24235e-11	3.90353e-11	Bacteroidota	Bacteroidia	Flavobacteriales	Flavobacteriaceae	Flavobacterium	ASV80	7 days vs 14 days
425.389	3.15085	0.918742	3.42953	0.000604624	0.004226	0.00754864	Bacteroidota	Bacteroidia	Flavobacteriales	Flavobacteriaceae	Flavobacterium	ASV3	7 days vs 14 days
35.0103	5.97309	1.37276	4.35116	1.3542e-05	0.000149865	0.000254494	Bacteroidota	Bacteroidia	Flavobacteriales	Flavobacteriaceae	Flavobacterium	ASV165	7 days vs 14 days
113.999	4.77854	1.22207	3.9102	9.22214e-05	0.000816467	0.00141529	Bacteroidota	Bacteroidia	Flavobacteriales	Flavobacteriaceae	Flavobacterium	ASV46	7 days vs 14 days
178.446	34.3616	1.69266	20.3003	1.27756e-91	8.48298e-89	6.84259e-88	Bacteroidota	Bacteroidia	Flavobacteriales	Flavobacteriaceae	Flavobacterium	ASV27	7 days vs 14 days
257.843	4.84114	1.32815	3.64502	0.000267369	0.00219177	0.00370034	Bacteroidota	Bacteroidia	Cytophagales	Microscillaceae	Microscillaceae_unclassified	ASV11	7 days vs 14 days
53.8472	9.96917	1.32994	7.49595	6.58182e-14	6.24333e-12	6.07797e-12	Bacteroidota	Bacteroidia	Cytophagales	Cytophagaceae	Cytophaga	ASV109	7 days vs 14 days
25.9023	8.84795	1.84925	4.78462	1.71307e-06	2.47278e-05	3.97195e-05	Bacteroidota	Bacteroidia	Cytophagales	Cytophagaceae	Cytophaga	ASV250	7 days vs 14 days
8.82346	7.16518	2.32191	3.08589	0.00202943	0.0112053	0.0209431	Bacteroidota	Bacteroidia	Cytophagales	Cytophagaceae	Cytophaga	ASV530	7 days vs 14 days
109.667	8.52371	1.14464	7.44663	9.5754e-14	7.59329e-12	8.27191e-12	Bacteroidota	Bacteroidia	Cytophagales	Cyclobacteriaceae	Algoriphagus	ASV47	7 days vs 14 days
14.9957	4.15001	1.48272	2.79892	0.00512734	0.0238081	0.04577	Bacteroidota	Bacteroidia	Cytophagales	Cyclobacteriaceae	Algoriphagus	ASV380	7 days vs 14 days
18.9991	4.13138	1.3114	3.15036	0.00163068	0.00941541	0.0173983	Planctomycetota	Phycisphaerae	Phycisphaerales	Phycisphaeraceae	Phycisphaeraceae_unclassified	ASV305	7 days vs 14 days
5.88985	5.7435	1.75075	3.2806	0.00103588	0.00655072	0.0118168	Planctomycetota	Phycisphaerae	Tepidisphaerales	WD2101_soil_group	WD2101_soil_group_insertae_sedis_genus	ASV713	7 days vs 14 days
20.6806	6.27305	1.5263	4.10997	3.95708e-05	0.000386397	0.000672829	Planctomycetota	Phycisphaerae	Tepidisphaerales	WD2101_soil_group	WD2101_soil_group_insertae_sedis_genus	ASV280	7 days vs 14 days
12.3966	5.62409	1.71957	3.27064	0.00107303	0.00672165	0.0122021	Planctomycetota	Phycisphaerae	Tepidisphaerales	Tepidisphaeraceae	Tepidisphaera	ASV420	7 days vs 14 days
15.7321	5.45365	1.61631	3.37414	0.000740454	0.00506868	0.00891208	Planctomycetota	Phycisphaerae	Tepidisphaerales	WD2101_soil_group	WD2101_soil_group_insertae_sedis_genus	ASV351	7 days vs 14 days
76.5487	5.20774	1.19587	4.35478	1.33199e-05	0.000149865	0.000251202	Planctomycetota	Planctomycetes	Planctomycetales	Rubinisphaeraceae	SH-PL14	ASV68	7 days vs 14 days
8.15747	5.84819	1.91454	3.05463	0.00225342	0.0121648	0.0228586	Planctomycetota	Planctomycetes	Planctomycetales	Rubinisphaeraceae	SH-PL14	ASV572	7 days vs 14 days
23.402	7.41872	2.50392	2.96284	0.00304815	0.0155038	0.0297325	Planctomycetota	Planctomycetes	Planctomycetales	Rubinisphaeraceae	SH-PL14	ASV258	7 days vs 14 days
17.1055	6.59994	1.73162	3.81143	0.000138168	0.00119025	0.00202193	Planctomycetota	Planctomycetes	Planctomycetales	Rubinisphaeraceae	Rubinisphaeraceae_unclassified	ASV340	7 days vs 14 days
9.91532	6.86688	1.70832	4.01968	5.82767e-05	0.00054501	0.000945849	Planctomycetota	Planctomycetes	Planctomycetales	Rubinisphaeraceae	Planctomicrobium	ASV499	7 days vs 14 days
13.4527	8.39506	2.57554	3.25954	0.00111595	0.00692512	0.0126632	Planctomycetota	Planctomycetes	Planctomycetales	Rubinisphaeraceae	Planctomicrobium	ASV415	7 days vs 14 days
39.0393	2.57692	0.917184	2.8096	0.00496031	0.0233592	0.0447263	Planctomycetota	Planctomycetes	Planctomycetales	Rubinisphaeraceae	Planctomicrobium	ASV156	7 days vs 14 days
21.9379	6.01522	1.89342	3.17691	0.00148854	0.00882494	0.0161063	Planctomycetota	Planctomycetes	Planctomycetales	Planctomycetales_insertae_sedis_family	Planctomycetales_insertae_sedis_genus	ASV265	7 days vs 14 days
16.617	6.34938	1.16749	5.43849	5.37346e-08	1.23034e-06	1.63524e-06	Planctomycetota	Planctomycetes	Pirellulales	Pirellulaceae	Pirellulaceae_unclassified	ASV345	7 days vs 14 days
19.2492	4.56864	1.58392	2.8844	0.00392164	0.0191468	0.0365292	Planctomycetota	Planctomycetes	Pirellulales	Pirellulaceae	Pir4_lineage	ASV302	7 days vs 14 days
9.92384	6.74639	2.23127	3.02357	0.00249815	0.0133772	0.0250563	Planctomycetota	Planctomycetes	Pirellulales	Pirellulaceae	Pirellula	ASV504	7 days vs 14 days
76.5408	7.63769	1.11769	6.83344	8.28995e-12	4.23425e-10	5.04556e-10	Planctomycetota	Planctomycetes	Pirellulales	Pirellulaceae	Pirellula	ASV66	7 days vs 14 days
59.0602	7.24718	1.44613	5.01142	5.4031e-07	9.4412e-06	1.40076e-05	Planctomycetota	Planctomycetes	Pirellulales	Pirellulaceae	Pirellula	ASV99	7 days vs 14 days
57.7945	5.82774	1.8438	3.16072	0.00157378	0.00916656	0.0168921	Planctomycetota	Planctomycetes	Pirellulales	Pirellulaceae	Pirellula	ASV104	7 days vs 14 days
112.468	4.9273	1.06842	4.61174	3.99314e-06	5.19891e-05	8.52082e-05	Planctomycetota	Planctomycetes	Pirellulales	Pirellulaceae	Pirellula	ASV44	7 days vs 14 days
20.5936	5.96103	1.87411	3.18072	0.00146908	0.00878802	0.0159602	Planctomycetota	Planctomycetes	Pirellulales	Pirellulaceae	Pirellulaceae_insertae_sedis_genus	ASV295	7 days vs 14 days
228.57	3.67075	0.937191	3.91675	8.97494e-05	0.000805319	0.00138463	Planctomycetota	Planctomycetes	Planctomycetales	Planctomycetales_insertae_sedis_family	Planctomycetales_insertae_sedis_genus	ASV15	7 days vs 14 days
33.004	7.41672	1.29674	5.71949	1.06842e-08	3.54717e-07	4.00174e-07	Planctomycetota	Planctomycetes	Gemmatales	Gemmataceae	Gemmataceae_insertae_sedis_genus	ASV178	7 days vs 14 days
38.3222	6.47754	1.24798	5.19041	2.09835e-07	4.09794e-06	5.79316e-06	Planctomycetota	Planctomycetes	Gemmatales	Gemmataceae	Gemmataceae_insertae_sedis_genus	ASV148	7 days vs 14 days
29.4184	5.56364	1.21168	4.59167	4.39712e-06	5.61479e-05	9.34563e-05	Planctomycetota	Planctomycetes	Gemmatales	Gemmataceae	Gemmataceae_insertae_sedis_genus	ASV196	7 days vs 14 days
51.6665	7.21807	1.28426	5.62039	1.90524e-08	5.50035e-07	6.45853e-07	Planctomycetota	Planctomycetes	Gemmatales	Gemmataceae	Gemmata	ASV113	7 days vs 14 days
228.868	4.02228	0.96509	4.16778	3.07582e-05	0.000309447	0.000536616	Planctomycetota	Planctomycetes	Gemmatales	Gemmataceae	Gemmataceae_unclassified	ASV14	7 days vs 14 days
15.1573	6.93973	1.97929	3.50616	0.000454615	0.00331719	0.00588144	Planctomycetota	Planctomycetes	Isosphaerales	Isosphaeraceae	Isosphaeraceae_unclassified	ASV389	7 days vs 14 days
30.5655	4.49407	0.92871	4.83905	1.30464e-06	2.0146e-05	3.11948e-05	Planctomycetota	Planctomycetes	Isosphaerales	Isosphaeraceae	Isosphaeraceae_insertae_sedis_genus	ASV203	7 days vs 14 days
80.3663	7.07575	1.18952	5.94841	2.70753e-09	9.9878e-08	1.10112e-07	Acidobacteriota	Vicinamibacteria	Vicinamibacterales	Vicinamibacteraceae	Vicinamibacteraceae_insertae_sedis_genus	ASV63	7 days vs 14 days
58.4231	5.37836	1.50332	3.57766	0.000346688	0.00267676	0.00465379	Acidobacteriota	Vicinamibacteria	Vicinamibacterales	Vicinamibacteraceae	Vicinamibacteraceae_insertae_sedis_genus	ASV97	7 days vs 14 days
60.2475	6.51209	1.4052	4.63429	3.58161e-06	4.85345e-05	7.76644e-05	Acidobacteriota	Vicinamibacteria	Vicinamibacterales	Vicinamibacterales_insertae_sedis_family	Vicinamibacterales_insertae_sedis_genus	ASV90	7 days vs 14 days
59.7459	3.40219	1.06329	3.1997	0.00137573	0.00830438	0.015169	Acidobacteriota	Vicinamibacteria	Vicinamibacterales	Vicinamibacterales_insertae_sedis_family	Vicinamibacterales_insertae_sedis_genus	ASV94	7 days vs 14 days
23.7181	5.27798	1.56596	3.37044	0.000750471	0.00508482	0.00899222	Acidobacteriota	Vicinamibacteria	Vicinamibacterales	Vicinamibacterales_unclassified	Vicinamibacterales_unclassified	ASV248	7 days vs 14 days
15.4745	6.10477	2.17016	2.81305	0.00490743	0.0232752	0.0443241	Verrucomicrobiota	Verrucomicrobiia	Pedosphaerales	Pedosphaeraceae	Pedosphaeraceae_insertae_sedis_genus	ASV362	7 days vs 14 days
96.3315	8.31819	1.11847	7.4371	1.02921e-13	7.59329e-12	8.74992e-12	Verrucomicrobiota	Verrucomicrobiia	Pedosphaerales	Pedosphaeraceae	Pedosphaeraceae_insertae_sedis_genus	ASV52	7 days vs 14 days
20.6896	7.08052	1.10864	6.38668	1.69527e-10	6.62154e-09	7.96482e-09	Verrucomicrobiota	Verrucomicrobiia	Chthoniobacterales	Chthoniobacteraceae	Chthoniobacter	ASV285	7 days vs 14 days
46.2135	4.87738	1.67338	2.91469	0.00356037	0.0176424	0.033751	Verrucomicrobiota	Verrucomicrobiia	Chthoniobacterales	Chthoniobacteraceae	Chthoniobacter	ASV128	7 days vs 14 days
27.7475	6.59029	1.45909	4.5167	6.28113e-06	7.72346e-05	0.000129391	Verrucomicrobiota	Verrucomicrobiia	Chthoniobacterales	Xiphinematobacteraceae	Candidatus_Xiphinematobacter	ASV222	7 days vs 14 days
11.084	6.18242	1.4744	4.19318	2.75066e-05	0.000280991	0.000483771	Verrucomicrobiota	Verrucomicrobiia	Chthoniobacterales	Xiphinematobacteraceae	Candidatus_Xiphinematobacter	ASV479	7 days vs 14 days
35.5002	5.18001	1.47633	3.5087	0.000450298	0.00331719	0.00588144	Verrucomicrobiota	Verrucomicrobiia	Chthoniobacterales	Terrimicrobiaceae	Terrimicrobium	ASV169	7 days vs 14 days
76.4031	6.80203	1.38847	4.89894	9.63552e-07	1.56048e-05	2.35652e-05	Verrucomicrobiota	Verrucomicrobiia	Verrucomicrobiales	Verrucomicrobiaceae	Verrucomicrobiaceae_insertae_sedis_genus	ASV71	7 days vs 14 days
92.6362	4.13196	0.834397	4.95203	7.3444e-07	1.25043e-05	1.82961e-05	Verrucomicrobiota	Verrucomicrobiia	Verrucomicrobiales	Rubritaleaceae	Haloferula	ASV54	7 days vs 14 days
281.686	3.22549	0.503436	6.40695	1.4846e-10	6.16111e-09	7.03676e-09	Verrucomicrobiota	Verrucomicrobiia	Verrucomicrobiales	Rubritaleaceae	Luteolibacter	ASV10	7 days vs 14 days
358.213	4.32219	0.9998	4.32305	1.53885e-05	0.000167508	0.000283234	Verrucomicrobiota	Verrucomicrobiia	Verrucomicrobiales	Rubritaleaceae	Luteolibacter	ASV4	7 days vs 14 days
97.0005	5.09287	0.999819	5.0938	3.50964e-07	6.65829e-06	9.44605e-06	Verrucomicrobiota	Verrucomicrobiia	Verrucomicrobiales	Rubritaleaceae	Luteolibacter	ASV51	7 days vs 14 days
312.822	4.01092	1.14695	3.49703	0.000470465	0.00335902	0.00604271	Verrucomicrobiota	Verrucomicrobiia	Verrucomicrobiales	Rubritaleaceae	Luteolibacter	ASV8	7 days vs 14 days
43.6915	8.34568	1.05192	7.93376	2.12603e-15	4.70561e-13	2.47544e-13	Verrucomicrobiota	Verrucomicrobiia	Verrucomicrobiales	Rubritaleaceae	Luteolibacter	ASV134	7 days vs 14 days
173.36	10.4002	1.00529	10.3454	4.38921e-25	1.45722e-22	1.95905e-22	Verrucomicrobiota	Verrucomicrobiia	Verrucomicrobiales	Rubritaleaceae	Luteolibacter	ASV28	7 days vs 14 days
54.7307	4.91822	0.89323	5.50611	3.66855e-08	9.62648e-07	1.15581e-06	Verrucomicrobiota	Verrucomicrobiia	Verrucomicrobiales	Verrucomicrobiales_unclassified	Verrucomicrobiales_unclassified	ASV107	7 days vs 14 days
12.8481	7.16234	1.9382	3.69535	0.000219587	0.00184564	0.00310319	Verrucomicrobiota	Verrucomicrobiia	Verrucomicrobiales	Verrucomicrobiaceae	Verrucomicrobium	ASV405	7 days vs 14 days
45.4285	6.69962	1.2287	5.45262	4.9634e-08	1.17704e-06	1.52782e-06	Verrucomicrobiota	Verrucomicrobiia	Verrucomicrobiales	Verrucomicrobiaceae	Roseimicrobium	ASV125	7 days vs 14 days
57.2913	4.40306	1.59086	2.76772	0.00564493	0.0258499	0.0498093	Myxococcota	Polyangiia	Polyangiales	BIrii41	BIrii41_insertae_sedis_genus	ASV106	7 days vs 14 days
20.0779	5.52414	1.39659	3.95543	7.63965e-05	0.000694894	0.00120702	Myxococcota	Polyangiia	Polyangiales	Sandaracinaceae	Sandaracinaceae_insertae_sedis_genus	ASV291	7 days vs 14 days
141.07	5.73672	1.73615	3.30428	0.000952221	0.00623339	0.0111113	Pseudomonadota	Gammaproteobacteria	Pseudomonadales	Moraxellaceae	Moraxellaceae_insertae_sedis_genus	ASV36	7 days vs 14 days
9.5372	5.13553	1.44601	3.55151	0.00038303	0.00292336	0.00511599	Pseudomonadota	Gammaproteobacteria	Burkholderiales	Neisseriaceae	Neisseriaceae_insertae_sedis_genus	ASV505	7 days vs 14 days
29.925	6.16601	1.38843	4.44099	8.95457e-06	0.000108106	0.000176977	Pseudomonadota	Gammaproteobacteria	Burkholderiales	Sutterellaceae	Sutterellaceae_insertae_sedis_genus	ASV199	7 days vs 14 days
22.9239	6.01523	2.14407	2.80551	0.00502366	0.0234909	0.0452214	Pseudomonadota	Gammaproteobacteria	Burkholderiales	Burkholderiales_unclassified	Burkholderiales_unclassified	ASV247	7 days vs 14 days
45.2924	6.45131	1.39102	4.63782	3.52109e-06	4.85345e-05	7.66624e-05	Pseudomonadota	Gammaproteobacteria	Burkholderiales	Comamonadaceae	Comamonadaceae_unclassified	ASV131	7 days vs 14 days
200.539	3.48453	1.18756	2.93418	0.00334428	0.0168227	0.0319857	Pseudomonadota	Gammaproteobacteria	Burkholderiales	Comamonadaceae	Comamonadaceae_unclassified	ASV18	7 days vs 14 days
111.814	5.03018	0.914357	5.50133	3.7694e-08	9.62648e-07	1.18064e-06	Pseudomonadota	Gammaproteobacteria	Burkholderiales	SC-I-84	SC-I-84_insertae_sedis_genus	ASV45	7 days vs 14 days
78.6579	1.33461	0.479295	2.78452	0.00536074	0.024719	0.0476155	Pseudomonadota	Gammaproteobacteria	Burkholderiales	Alcaligenaceae	Achromobacter	ASV64	7 days vs 14 days
17.1507	4.49574	1.30079	3.45617	0.00054791	0.00387035	0.00692124	Pseudomonadota	Gammaproteobacteria	Burkholderiales	Chitinibacteraceae	Chitinibacteraceae_unclassified	ASV219	7 days vs 14 days
9.92605	7.77659	2.10959	3.6863	0.000227539	0.00188857	0.00319504	Pseudomonadota	Gammaproteobacteria	Burkholderiales	Chitinibacteraceae	Formivibrio	ASV472	7 days vs 14 days
90.104	6.48858	1.34764	4.81479	1.47358e-06	2.22377e-05	3.49226e-05	Pseudomonadota	Gammaproteobacteria	Pseudomonadales	Halieaceae	Kineobactrum	ASV60	7 days vs 14 days
20.7683	8.22263	1.49281	5.50815	3.62617e-08	9.62648e-07	1.14922e-06	Pseudomonadota	Gammaproteobacteria	Lysobacterales	Lysobacteraceae	Arenimonas	ASV281	7 days vs 14 days
52.7024	3.28142	1.09031	3.00962	0.00261579	0.0138951	0.0260897	Pseudomonadota	Gammaproteobacteria	Lysobacterales	Lysobacteraceae	Pseudoxanthomonas	ASV115	7 days vs 14 days
7.43287	5.79899	1.95013	2.97365	0.00294285	0.0151477	0.0288555	Pseudomonadota	Gammaproteobacteria	Pseudomonadales	Pseudomonadaceae	Pseudomonas	ASV588	7 days vs 14 days
121.489	3.30443	0.921715	3.58509	0.000336965	0.00267676	0.00455753	Pseudomonadota	Gammaproteobacteria	Enterobacterales	Aeromonadaceae	Aeromonas	ASV17	7 days vs 14 days
42.2977	5.82532	1.36188	4.27742	1.8907e-05	0.000202488	0.000344443	Pseudomonadota	Gammaproteobacteria	Steroidobacterales	Steroidobacteraceae	Steroidobacter	ASV136	7 days vs 14 days
21.5156	6.33575	1.44859	4.37374	1.22137e-05	0.000139825	0.000232798	Pseudomonadota	Gammaproteobacteria	Steroidobacterales	Steroidobacteraceae	Steroidobacter	ASV273	7 days vs 14 days
36.5602	5.98695	1.24619	4.80421	1.55365e-06	2.2925e-05	3.64973e-05	Pseudomonadota	Gammaproteobacteria	PLTA13	PLTA13_insertae_sedis_family	PLTA13_insertae_sedis_genus	ASV159	7 days vs 14 days
57.3112	6.5012	1.22805	5.29391	1.1973e-07	2.48439e-06	3.52347e-06	Pseudomonadota	Gammaproteobacteria	CCM19a	CCM19a_insertae_sedis_family	CCM19a_insertae_sedis_genus	ASV101	7 days vs 14 days
54.2393	2.7892	0.990787	2.81513	0.00487574	0.0232752	0.0441123	Cyanobacteriota	Cyanobacteriia	Cyanobacteriales	Nostocaceae	Cylindrospermopsis_CRJ1	ASV76	7 days vs 14 days
41.429	2.88791	0.917691	3.14693	0.00164992	0.00944439	0.017499	Cyanobacteriota	Cyanobacteriia	Cyanobacteriales	Nostocaceae	Nostocaceae_unclassified	ASV108	7 days vs 14 days
11.5286	5.67906	1.47936	3.83887	0.000123603	0.0010799	0.00182373	Pseudomonadota	Alphaproteobacteria	Tistrellales	Geminicoccaceae	Candidatus_Alysiosphaera	ASV455	7 days vs 14 days
10.6329	6.40511	1.23014	5.20682	1.92102e-07	3.86533e-06	5.44391e-06	Pseudomonadota	Alphaproteobacteria	Caulobacterales	Caulobacteraceae	Asticcacaulis	ASV478	7 days vs 14 days
18.5516	5.88132	1.39334	4.22102	2.432e-05	0.00025232	0.000434193	Pseudomonadota	Alphaproteobacteria	Sphingomonadales	Sphingomonadaceae	Novosphingobium	ASV320	7 days vs 14 days
24.998	6.48426	1.18298	5.48128	4.22256e-08	1.03844e-06	1.31488e-06	Pseudomonadota	Alphaproteobacteria	Sphingomonadales	Sphingomonadaceae	Novosphingobium	ASV234	7 days vs 14 days
29.003	6.89787	1.02927	6.70174	2.05957e-11	9.76823e-10	1.18613e-09	Pseudomonadota	Alphaproteobacteria	Hyphomicrobiales	Rhizobiaceae	Rhizobiaceae_unclassified	ASV205	7 days vs 14 days
47.5572	2.27225	0.725683	3.13119	0.00174101	0.00979689	0.0183922	Pseudomonadota	Alphaproteobacteria	Hyphomicrobiales	Devosiaceae	Devosia	ASV121	7 days vs 14 days
24.0676	5.40367	1.80003	3.00199	0.00268221	0.0141017	0.0267025	Pseudomonadota	Alphaproteobacteria	Hyphomicrobiales	Hyphomicrobiales_unclassified	Hyphomicrobiales_unclassified	ASV243	7 days vs 14 days
36.7229	6.71739	1.66559	4.03303	5.50616e-05	0.000522298	0.000901865	Pseudomonadota	Alphaproteobacteria	Hyphomicrobiales	Xanthobacteraceae	Pseudorhodoplanes	ASV166	7 days vs 14 days
27.3381	6.94813	1.06508	6.52358	6.86507e-11	3.03894e-09	3.50184e-09	Pseudomonadota	Alphaproteobacteria	Alphaproteobacteria_unclassified	Alphaproteobacteria_unclassified	Alphaproteobacteria_unclassified	ASV220	7 days vs 14 days
126.696	4.3844	1.05879	4.14094	3.45881e-05	0.000342783	0.000591865	Pseudomonadota	Alphaproteobacteria	Rhodobacterales	Paracoccaceae	Paracoccaceae_unclassified	ASV42	7 days vs 14 days
76.1683	7.98087	1.13688	7.01997	2.21922e-12	1.22797e-10	1.52386e-10	Pseudomonadota	Alphaproteobacteria	Rhodobacterales	Paracoccaceae	Paracoccaceae_unclassified	ASV69	7 days vs 14 days
40.478	4.3536	0.893148	4.87444	1.09115e-06	1.72505e-05	2.65645e-05	Pseudomonadota	Alphaproteobacteria	Rhodobacterales	Paracoccaceae	Amaricoccus	ASV146	7 days vs 14 days
67.8232	5.8169	1.36729	4.25434	2.09664e-05	0.000220979	0.000377824	Bdellovibrionota	Oligoflexia	Oligoflexales	Oligoflexaceae	Oligoflexus	ASV75	7 days vs 14 days
19.0463	5.17126	1.79203	2.8857	0.0039054	0.0191468	0.036505	Hydrogenedentes	Hydrogenedentia	Hydrogenedentiales	Hydrogenedensaceae	Hydrogenedensaceae_insertae_sedis_genus	ASV328	7 days vs 14 days
38.0346	6.64572	1.42339	4.66895	3.02738e-06	4.27698e-05	6.72807e-05	Chloroflexota	KD4-96	KD4-96_insertae_sedis_order	KD4-96_insertae_sedis_family	KD4-96_insertae_sedis_genus	ASV157	7 days vs 14 days
15.0063	5.9011	1.91341	3.08407	0.00204192	0.0112053	0.0209512	Chloroflexota	KD4-96	KD4-96_insertae_sedis_order	KD4-96_insertae_sedis_family	KD4-96_insertae_sedis_genus	ASV374	7 days vs 14 days
20.1456	5.91664	1.20747	4.90005	9.58146e-07	1.56048e-05	2.35405e-05	Chloroflexota	Anaerolineae	RBG-13-54-9	RBG-13-54-9_insertae_sedis_family	RBG-13-54-9_insertae_sedis_genus	ASV288	7 days vs 14 days
15.3431	5.58671	1.26828	4.40493	1.05816e-05	0.000125468	0.000205345	Chloroflexota	Anaerolineae	Caldilineales	Caldilineaceae	Caldilineaceae_insertae_sedis_genus	ASV352	7 days vs 14 days
18.5868	5.14042	1.56513	3.28435	0.00102218	0.00652624	0.0117188	Chloroflexota	Chloroflexia	Thermomicrobiales	AKYG1722	AKYG1722_insertae_sedis_genus	ASV314	7 days vs 14 days
35.8059	4.30061	1.20074	3.58163	0.000341463	0.00267676	0.00460674	Chloroflexota	Chloroflexia	Thermomicrobiales	JG30-KF-CM45	JG30-KF-CM45_insertae_sedis_genus	ASV164	7 days vs 14 days
7.45108	5.41502	1.91872	2.8222	0.00476947	0.0231163	0.0434444	Chloroflexota	Chloroflexia	Thermomicrobiales	JG30-KF-CM45	JG30-KF-CM45_insertae_sedis_genus	ASV617	7 days vs 14 days
19.2254	6.48478	2.18949	2.96177	0.00305874	0.0155038	0.0297325	Chloroflexota	Chloroflexia	Thermomicrobiales	JG30-KF-CM45	JG30-KF-CM45_insertae_sedis_genus	ASV306	7 days vs 14 days
43.4158	6.93246	1.27851	5.42228	5.88444e-08	1.30242e-06	1.77062e-06	Actinomycetota	Acidimicrobiia	Actinomarinales	Actinomarinales_insertae_sedis_family	Actinomarinales_insertae_sedis_genus	ASV129	7 days vs 14 days
10.094	5.12399	1.63371	3.13641	0.00171033	0.00970648	0.0181038	Actinomycetota	Acidimicrobiia	Microtrichales	Microtrichales_insertae_sedis_family	Microtrichales_insertae_sedis_genus	ASV514	7 days vs 14 days
25.62	5.71153	1.58862	3.59527	0.00032405	0.00262401	0.0044051	Actinomycetota	Acidimicrobiia	Microtrichales	Microtrichales_unclassified	Microtrichales_unclassified	ASV238	7 days vs 14 days
15.6643	5.95097	1.66285	3.57878	0.000345208	0.00267676	0.00464557	Actinomycetota	Acidimicrobiia	Microtrichales	Iamiaceae	Aquihabitans	ASV375	7 days vs 14 days
39.4035	7.2872	1.28712	5.66164	1.49933e-08	4.52526e-07	5.21456e-07	Actinomycetota	Acidimicrobiia	Microtrichales	Ilumatobacteraceae	Ilumatobacter	ASV150	7 days vs 14 days
40.9427	7.02639	1.22071	5.75597	8.61469e-09	3.01061e-07	3.24932e-07	Actinomycetota	Acidimicrobiia	Acidimicrobiales	Acidimicrobiaceae	Acidiferrimicrobium	ASV141	7 days vs 14 days
24.4496	6.6182	1.23682	5.35097	8.74828e-08	1.87382e-06	2.61764e-06	Actinomycetota	Actinobacteria	Propionibacteriales	Propionibacteriaceae	Propionibacteriaceae_insertae_sedis_genus	ASV251	7 days vs 14 days
15.1133	5.28628	1.5756	3.3551	0.000793375	0.00532123	0.00942199	Actinomycetota	Actinobacteria	Actinobacteria_unclassified	Actinobacteria_unclassified	Actinobacteria_unclassified	ASV377	7 days vs 14 days
18.9592	6.25608	1.9005	3.29181	0.00099546	0.00641733	0.0115155	Actinomycetota	Actinobacteria	Frankiales	Frankiales_unclassified	Frankiales_unclassified	ASV318	7 days vs 14 days
22.7474	5.34026	1.5639	3.41471	0.000638509	0.00441636	0.00789334	Actinomycetota	Actinobacteria	Frankiales	Nakamurellaceae	Nakamurella	ASV266	7 days vs 14 days
123.996	3.47433	0.992365	3.50106	0.000463411	0.00334462	0.0059808	Actinomycetota	Actinobacteria	Mycobacteriales	Mycobacteriaceae	Mycobacterium	ASV43	7 days vs 14 days
37.1326	5.84856	2.07738	2.81535	0.00487242	0.0232752	0.0441123	Actinomycetota	Actinobacteria	Mycobacteriales	Mycobacteriaceae	Mycobacterium	ASV160	7 days vs 14 days
38.6688	6.01519	1.81935	3.30622	0.000945633	0.00623339	0.0110585	Actinomycetota	Actinobacteria	Mycobacteriales	Mycobacteriaceae	Mycobacterium	ASV154	7 days vs 14 days
52.6164	7.8826	1.03709	7.60066	2.9462e-14	3.26046e-12	2.81783e-12	Actinomycetota	Actinobacteria	Mycobacteriales	Mycobacteriaceae	Mycobacterium	ASV110	7 days vs 14 days
65.5732	4.17037	1.30209	3.20283	0.00136083	0.00830438	0.0150903	Actinomycetota	Actinobacteria	Micrococcales	Demequinaceae	Demequina	ASV84	7 days vs 14 days
19.5427	6.33292	1.44238	4.39059	1.13045e-05	0.000131688	0.000217014	Actinomycetota	Actinobacteria	Micrococcales	Cellulomonadaceae	Cellulomonas	ASV315	7 days vs 14 days
32.2015	5.49245	1.18868	4.62063	3.8258e-06	5.08066e-05	8.2293e-05	Actinomycetota	Thermoleophilia	Solirubrobacterales	67-14	67-14_insertae_sedis_genus	ASV185	7 days vs 14 days
35.9026	3.70525	1.19157	3.10954	0.00187378	0.0104554	0.0195252	Actinomycetota	Thermoleophilia	Gaiellales	Gaiellaceae	Gaiella	ASV170	7 days vs 14 days
20.6597	4.74012	1.48078	3.2011	0.00136905	0.00830438	0.0151501	Gemmatimonadota	Gemmatimonadia	Gemmatimonadales	Gemmatimonadaceae	Gemmatimonadaceae_insertae_sedis_genus	ASV300	7 days vs 14 days
18.7054	4.38937	1.46298	3.0003	0.00269717	0.0141017	0.0268016	Gemmatimonadota	Gemmatimonadia	Gemmatimonadales	Gemmatimonadaceae	Gemmatimonadaceae_insertae_sedis_genus	ASV329	7 days vs 14 days
65.9316	4.94313	1.6563	2.98445	0.0028409	0.0147372	0.0280736	Bacillota	Clostridia	Peptostreptococcales-Tissierellales	Fusibacteraceae	Fusibacter	ASV85	7 days vs 14 days
8.88435	5.73491	1.96146	2.9238	0.00345785	0.0172633	0.0328373	Acidobacteriota	Acidobacteriae	Bryobacterales	Bryobacteraceae	Bryobacteraceae_unclassified	ASV538	7 days vs 14 days
91.3202	8.12385	1.05156	7.72551	1.11405e-14	1.47946e-12	1.14747e-12	Acidobacteriota	Acidobacteriae	Bryobacterales	Bryobacteraceae	Bryobacteraceae_unclassified	ASV56	7 days vs 14 days
30.7615	4.87924	1.47734	3.30271	0.000957539	0.00623339	0.0111491	Acidobacteriota	Acidobacteriae	Bryobacterales	Bryobacteraceae	Paludibaculum	ASV184	7 days vs 14 days
44.7667	5.22246	1.48932	3.50662	0.000453842	0.00331719	0.00588144	Acidobacteriota	Acidobacteriae	Bryobacterales	Bryobacteraceae	Paludibaculum	ASV127	7 days vs 14 days
66.0959	4.79077	0.941653	5.08762	3.6258e-07	6.68759e-06	9.7099e-06	Nitrospirota	Nitrospiria	Nitrospirales	Nitrospiraceae	Nitrospira	ASV81	7 days vs 14 days
22.0342	4.68404	1.47757	3.17011	0.00152384	0.00895423	0.0163889	Nitrospirota	Nitrospiria	Nitrospirales	Nitrospiraceae	Nitrospira	ASV271	7 days vs 14 days
19.8322	-23.6741	2.57406	-9.19717	3.67508e-20	2.75019e-18	8.55815e-18	Bacteroidota	Bacteroidia	Bacteroidales	Bacteroidaceae	Bacteroides	ASV289	14 days vs 21 days
132.303	-11.6533	2.32854	-5.00453	5.59978e-07	5.58734e-06	1.44194e-05	Bacteroidota	Bacteroidia	Bacteroidales	Paludibacteraceae	Paludibacter	ASV38	14 days vs 21 days
31.7032	-9.65886	2.50443	-3.85671	0.000114923	0.000714147	0.00172157	Bacteroidota	Bacteroidia	Bacteroidales	Paludibacteraceae	Paludibacter	ASV188	14 days vs 21 days
37.7745	-9.86177	1.94054	-5.08196	3.73566e-07	3.90073e-06	9.90505e-06	Bacteroidota	Bacteroidia	Bacteroidales	Tannerellaceae	Macellibacteroides	ASV155	14 days vs 21 days
5.20717	6.30981	2.26353	2.78759	0.00531014	0.0199519	0.0472443	Bacteroidota	Bacteroidia	Sphingobacteriales	Sphingobacteriales_unclassified	Sphingobacteriales_unclassified	ASV751	14 days vs 21 days
23.9492	-6.84268	1.90465	-3.59262	0.000327368	0.00182594	0.00443895	Bacteroidota	Bacteroidia	Sphingobacteriales	Sphingobacteriaceae	Sphingobacterium	ASV216	14 days vs 21 days
10.1373	-6.35351	1.75024	-3.63007	0.000283342	0.00161038	0.00389122	Bacteroidota	Bacteroidia	Sphingobacteriales	Sphingobacteriaceae	Sphingobacterium	ASV481	14 days vs 21 days
44.8306	-8.00124	1.25941	-6.35314	2.10957e-10	3.93093e-09	9.7404e-09	Bacteroidota	Bacteroidia	Sphingobacteriales	Sphingobacteriaceae	Pedobacter	ASV122	14 days vs 21 days
13.4215	-6.81314	1.72544	-3.94865	7.85934e-05	0.000511426	0.00123808	Bacteroidota	Bacteroidia	Sphingobacteriales	Sphingobacteriaceae	Pedobacter	ASV399	14 days vs 21 days
12.4215	-8.13179	1.60275	-5.07365	3.90263e-07	4.02823e-06	1.02968e-05	Bacteroidota	Bacteroidia	Chitinophagales	Chitinophagales_insertae_sedis_family	Chitinophagales_insertae_sedis_genus	ASV418	14 days vs 21 days
74.9671	4.66255	1.13784	4.09771	4.17255e-05	0.000290461	0.000707221	Bacteroidota	Bacteroidia	Chitinophagales	Chitinophagaceae	Aurantisolimonas	ASV67	14 days vs 21 days
85.9698	9.71134	1.04364	9.30524	1.33693e-20	1.33396e-18	3.58031e-18	Bacteroidota	Bacteroidia	Chitinophagales	Chitinophagaceae	Aurantisolimonas	ASV62	14 days vs 21 days
11.4557	6.9114	1.6886	4.09297	4.25878e-05	0.000294183	0.000717296	Bacteroidota	Bacteroidia	Chitinophagales	Chitinophagaceae	Aurantisolimonas	ASV439	14 days vs 21 days
31.2249	-8.99273	1.35494	-6.63699	3.20149e-11	7.01205e-10	1.74971e-09	Bacteroidota	Bacteroidia	Chitinophagales	Chitinophagaceae	Taibaiella	ASV183	14 days vs 21 days
27.0992	-9.41088	2.92125	-3.22153	0.0012751	0.00615612	0.0143175	Bacteroidota	Bacteroidia	Chitinophagales	Chitinophagaceae	Chitinophagaceae_unclassified	ASV221	14 days vs 21 days
22.3591	-8.64131	1.85745	-4.65224	3.28349e-06	2.83517e-05	7.20754e-05	Bacteroidota	Bacteroidia	Chitinophagales	Chitinophagaceae	Agriterribacter	ASV272	14 days vs 21 days
29.2802	8.72753	1.14241	7.63955	2.17977e-14	7.24974e-13	2.162e-12	Bacteroidota	Bacteroidia	Chitinophagales	Chitinophagaceae	Ferruginibacter	ASV189	14 days vs 21 days
71.3295	3.19252	0.712822	4.47871	7.5095e-06	6.13049e-05	0.000151777	Bacteroidota	Bacteroidia	Chitinophagales	Chitinophagaceae	Chitinophagaceae_insertae_sedis_genus	ASV73	14 days vs 21 days
5.92707	6.36457	2.23287	2.85039	0.0043665	0.0169745	0.0402753	Bacteroidota	Bacteroidia	Chitinophagales	Chitinophagaceae	Ferruginibacter	ASV682	14 days vs 21 days
58.4564	-3.73356	0.627695	-5.94804	2.71373e-09	4.27531e-08	1.10112e-07	Bacteroidota	Bacteroidia	Chitinophagales	Chitinophagaceae	Chitinophagaceae_unclassified	ASV93	14 days vs 21 days
48.8194	-9.2796	1.64808	-5.63056	1.7963e-08	2.33779e-07	6.1673e-07	Bacteroidota	Bacteroidia	Chitinophagales	Chitinophagaceae	Terrimonas	ASV117	14 days vs 21 days
172.747	-4.09112	0.458235	-8.928	4.33769e-19	2.78232e-17	8.01127e-17	Bacteroidota	Bacteroidia	Chitinophagales	Chitinophagaceae	Flavihumibacter	ASV25	14 days vs 21 days
20.2322	-8.33598	2.93213	-2.84297	0.00446946	0.0172999	0.0409204	Bacteroidota	Bacteroidia	Chitinophagales	Chitinophagaceae	Flavihumibacter	ASV297	14 days vs 21 days
27.0014	-9.03832	1.59274	-5.67468	1.38948e-08	1.84616e-07	4.95761e-07	Bacteroidota	Bacteroidia	Chitinophagales	Chitinophagaceae	Chitinophagaceae_unclassified	ASV217	14 days vs 21 days
65.9333	6.29974	1.10324	5.7102	1.12847e-08	1.58338e-07	4.19727e-07	Bacteroidota	Bacteroidia	Chitinophagales	Chitinophagaceae	Chitinophagaceae_insertae_sedis_genus	ASV87	14 days vs 21 days
23.0312	8.34869	1.22627	6.80821	9.88199e-12	2.39839e-10	5.94696e-10	Bacteroidota	Bacteroidia	Chitinophagales	Saprospiraceae	Saprospiraceae_insertae_sedis_genus	ASV239	14 days vs 21 days
47.2631	8.64802	1.23982	6.9752	3.05442e-12	8.06726e-11	2.07082e-10	Bacteroidota	Bacteroidia	Chitinophagales	Saprospiraceae	Saprospiraceae_insertae_sedis_genus	ASV123	14 days vs 21 days
35.7811	8.99678	1.16068	7.75129	9.09663e-15	3.40366e-13	9.74431e-13	Bacteroidota	Bacteroidia	Chitinophagales	Saprospiraceae	Saprospiraceae_insertae_sedis_genus	ASV162	14 days vs 21 days
15.225	4.72692	1.28289	3.68458	0.000229084	0.00133583	0.00320359	Bacteroidota	Bacteroidia	Sphingobacteriales	env.OPS_17	env.OPS_17_insertae_sedis_genus	ASV359	14 days vs 21 days
12.6434	7.28317	1.1969	6.08501	1.16486e-09	1.97367e-08	4.99119e-08	Bacteroidota	Bacteroidia	Sphingobacteriales	env.OPS_17	env.OPS_17_insertae_sedis_genus	ASV414	14 days vs 21 days
48.7455	9.48616	1.10745	8.56578	1.07348e-17	6.02488e-16	1.59709e-15	Bacteroidota	Bacteroidia	Bacteroidales	Prolixibacteraceae	Prolixibacteraceae_insertae_sedis_genus	ASV114	14 days vs 21 days
74.8868	-6.65757	2.19741	-3.02973	0.00244773	0.010467	0.0245967	Bacteroidota	Bacteroidia	Flavobacteriales	Crocinitomicaceae	Fluviicola	ASV78	14 days vs 21 days
161.155	-4.55899	0.813444	-5.60456	2.08789e-08	2.64074e-07	6.9892e-07	Bacteroidota	Bacteroidia	Flavobacteriales	Flavobacteriaceae	Lutibacter	ASV33	14 days vs 21 days
14.2872	-7.81418	2.56849	-3.04232	0.00234762	0.0102338	0.0237691	Bacteroidota	Bacteroidia	Flavobacteriales	Flavobacteriaceae	Flavobacterium	ASV384	14 days vs 21 days
28.0579	-8.95833	2.12555	-4.21459	2.50228e-05	0.000184184	0.000445256	Bacteroidota	Bacteroidia	Flavobacteriales	Flavobacteriaceae	Flavobacterium	ASV208	14 days vs 21 days
119.517	-11.3459	1.89119	-5.99934	1.98115e-09	3.20583e-08	8.28989e-08	Bacteroidota	Bacteroidia	Flavobacteriales	Flavobacteriaceae	Flavobacterium	ASV40	14 days vs 21 days
179.57	-32.0508	2.40212	-13.3427	1.30684e-40	1.17354e-37	2.33314e-37	Bacteroidota	Bacteroidia	Flavobacteriales	Flavobacteriaceae	Flavobacterium	ASV29	14 days vs 21 days
21.5347	-8.86313	1.68375	-5.26392	1.41016e-07	1.5829e-06	4.08259e-06	Bacteroidota	Bacteroidia	Flavobacteriales	Flavobacteriaceae	Flavobacterium	ASV254	14 days vs 21 days
329.657	11.6512	1.01124	11.5217	1.0257e-30	4.60539e-28	7.84806e-28	Bacteroidota	Bacteroidia	Flavobacteriales	Flavobacteriaceae	Flavobacterium	ASV5	14 days vs 21 days
47.8969	-9.48899	1.26896	-7.47777	7.55918e-14	2.34074e-12	6.8622e-12	Bacteroidota	Bacteroidia	Flavobacteriales	Flavobacteriaceae	Flavobacterium	ASV118	14 days vs 21 days
18.4699	-30.5388	2.90803	-10.5016	8.49653e-26	1.90747e-23	4.13704e-23	Bacteroidota	Bacteroidia	Flavobacteriales	Flavobacteriaceae	Flavobacterium	ASV311	14 days vs 21 days
24.454	-9.14531	2.8084	-3.25642	0.00112829	0.00553662	0.0127761	Bacteroidota	Bacteroidia	Flavobacteriales	Flavobacteriaceae	Flavobacterium	ASV257	14 days vs 21 days
22.3322	-30.5721	4.65309	-6.57026	5.02262e-11	1.04891e-09	2.63737e-09	Bacteroidota	Bacteroidia	Flavobacteriales	Flavobacteriaceae	Flavobacterium	ASV274	14 days vs 21 days
31.843	-9.0462	2.67178	-3.38583	0.00070964	0.00361557	0.00859916	Bacteroidota	Bacteroidia	Flavobacteriales	Flavobacteriaceae	Flavobacterium	ASV198	14 days vs 21 days
24.3036	-7.73998	1.78871	-4.32713	1.51065e-05	0.000114963	0.000279966	Bacteroidota	Bacteroidia	Flavobacteriales	Flavobacteriaceae	Flavobacterium	ASV252	14 days vs 21 days
60.2402	9.54033	1.049	9.09473	9.48255e-20	6.55025e-18	2.03154e-17	Bacteroidota	Bacteroidia	Flavobacteriales	Flavobacteriaceae	Flavobacterium	ASV88	14 days vs 21 days
194.541	-3.40159	0.912165	-3.72913	0.000192139	0.00114265	0.00273695	Bacteroidota	Bacteroidia	Flavobacteriales	Flavobacteriaceae	Flavobacterium	ASV24	14 days vs 21 days
20.1196	-8.07367	1.27133	-6.35059	2.14494e-10	3.93093e-09	9.81905e-09	Bacteroidota	Bacteroidia	Flavobacteriales	Flavobacteriaceae	Flavobacterium	ASV301	14 days vs 21 days
65.5136	-10.0925	1.48373	-6.80215	1.03068e-11	2.43566e-10	6.1337e-10	Bacteroidota	Bacteroidia	Flavobacteriales	Flavobacteriaceae	Flavobacterium	ASV82	14 days vs 21 days
24.4606	-8.41224	1.31764	-6.38432	1.72162e-10	3.28939e-09	8.01826e-09	Bacteroidota	Bacteroidia	Flavobacteriales	Flavobacteriaceae	Flavobacterium	ASV231	14 days vs 21 days
28.5499	7.31776	1.17463	6.22983	4.66949e-10	8.22197e-09	2.10166e-08	Bacteroidota	Bacteroidia	Flavobacteriales	Flavobacteriaceae	Flavobacterium	ASV225	14 days vs 21 days
54.0562	9.4851	1.11925	8.47453	2.36035e-17	1.24682e-15	3.36847e-15	Bacteroidota	Bacteroidia	Flavobacteriales	Flavobacteriaceae	Flavobacterium	ASV102	14 days vs 21 days
58.4463	-10.0456	1.76949	-5.67713	1.36977e-08	1.84616e-07	4.92383e-07	Bacteroidota	Bacteroidia	Flavobacteriales	Flavobacteriaceae	Mariniflexile	ASV89	14 days vs 21 days
38.0955	-8.79581	1.68633	-5.21594	1.82891e-07	2.00287e-06	5.21043e-06	Bacteroidota	Bacteroidia	Flavobacteriales	Flavobacteriaceae	Mariniflexile	ASV151	14 days vs 21 days
165.987	-2.81406	0.951771	-2.95666	0.00310991	0.0126941	0.0301206	Bacteroidota	Bacteroidia	Flavobacteriales	Flavobacteriaceae	Arenibacter	ASV30	14 days vs 21 days
21.4495	-7.56582	1.75771	-4.30436	1.67468e-05	0.000125322	0.000306128	Bacteroidota	Bacteroidia	Flavobacteriales	Flavobacteriaceae	Arenibacter	ASV276	14 days vs 21 days
8.13843	6.36847	1.85573	3.43178	0.000599626	0.00316743	0.00750373	Bacteroidota	Bacteroidia	Flavobacteriales	Weeksellaceae	Weeksellaceae_unclassified	ASV543	14 days vs 21 days
21.6047	7.96704	1.15879	6.87529	6.18631e-12	1.58723e-10	3.94451e-10	Bacteroidota	Bacteroidia	Cytophagales	Microscillaceae	OLB12	ASV278	14 days vs 21 days
22.9816	-8.78959	2.06617	-4.25404	2.09946e-05	0.000155811	0.000377824	Bacteroidota	Bacteroidia	Cytophagales	Cytophagaceae	Cytophaga	ASV230	14 days vs 21 days
53.8472	-3.36889	0.979207	-3.44042	0.000580806	0.00308618	0.00730234	Bacteroidota	Bacteroidia	Cytophagales	Cytophagaceae	Cytophaga	ASV109	14 days vs 21 days
136.272	-10.3267	1.57513	-6.55613	5.52235e-11	1.12706e-09	2.87162e-09	Bacteroidota	Bacteroidia	Cytophagales	Cyclobacteriaceae	Algoriphagus	ASV35	14 days vs 21 days
188.076	-5.52469	1.00093	-5.51957	3.39826e-08	4.01531e-07	1.0834e-06	Bacteroidota	Bacteroidia	Cytophagales	Spirosomataceae	Emticicia	ASV20	14 days vs 21 days
6.99821	6.63854	1.75761	3.77702	0.000158717	0.000969575	0.00229753	Bacteroidota	Bacteroidia	Cytophagales	Spirosomataceae	Spirosomataceae_unclassified	ASV599	14 days vs 21 days
6.96995	-6.59582	2.35646	-2.79904	0.00512553	0.0193392	0.04577	Bacteroidota	Bacteroidia	Cytophagales	Spirosomataceae	Fibrisoma	ASV597	14 days vs 21 days
59.2	-10.1867	1.8724	-5.44048	5.31375e-08	6.19708e-07	1.62631e-06	Bacteroidota	Bacteroidia	Cytophagales	Spirosomataceae	Dyadobacter	ASV98	14 days vs 21 days
93.7641	-9.85279	1.27346	-7.73703	1.0177e-14	3.65558e-13	1.06878e-12	Bacteroidota	Bacteroidia	Cytophagales	Spirosomataceae	Dyadobacter	ASV53	14 days vs 21 days
70.3403	-10.298	1.11176	-9.26277	1.99195e-20	1.78877e-18	5.08041e-18	Bacteroidota	Bacteroidia	Cytophagales	Spirosomataceae	Dyadobacter	ASV74	14 days vs 21 days
19.077	-6.20787	2.0029	-3.09944	0.00193887	0.00861932	0.0201251	Bacteroidota	Bacteroidia	Cytophagales	Spirosomataceae	Dyadobacter	ASV303	14 days vs 21 days
21.5318	8.05338	1.60713	5.01104	5.41369e-07	5.46235e-06	1.40076e-05	Planctomycetota	vadinHA49	vadinHA49_insertae_sedis_order	vadinHA49_insertae_sedis_family	vadinHA49_insertae_sedis_genus	ASV267	14 days vs 21 days
9.50585	7.14064	1.31629	5.42483	5.80106e-08	6.67866e-07	1.75539e-06	Planctomycetota	Phycisphaerae	Phycisphaerales	Phycisphaeraceae	SM1A02	ASV482	14 days vs 21 days
18.9991	3.79418	0.946713	4.00774	6.13019e-05	0.000401819	0.000985986	Planctomycetota	Phycisphaerae	Phycisphaerales	Phycisphaeraceae	Phycisphaeraceae_unclassified	ASV305	14 days vs 21 days
13.4527	-8.45854	2.57554	-3.28418	0.00102278	0.00508025	0.0117188	Planctomycetota	Planctomycetes	Planctomycetales	Rubinisphaeraceae	Planctomicrobium	ASV415	14 days vs 21 days
39.0393	-9.77251	1.28741	-7.59084	3.1785e-14	1.01939e-12	2.98668e-12	Planctomycetota	Planctomycetes	Planctomycetales	Rubinisphaeraceae	Planctomicrobium	ASV156	14 days vs 21 days
11.0645	-7.31973	1.88312	-3.88702	0.000101482	0.00064177	0.00153977	Planctomycetota	Planctomycetes	Planctomycetales	Rubinisphaeraceae	Rubinisphaera	ASV473	14 days vs 21 days
76.5408	1.93006	0.647757	2.97961	0.00288615	0.0120637	0.0284371	Planctomycetota	Planctomycetes	Pirellulales	Pirellulaceae	Pirellula	ASV66	14 days vs 21 days
13.9991	7.76846	2.49474	3.11394	0.00184609	0.00828897	0.0192742	Planctomycetota	Planctomycetes	Pirellulales	Pirellulaceae	Pirellulaceae_insertae_sedis_genus	ASV379	14 days vs 21 days
112.468	2.68003	0.874026	3.06631	0.00216721	0.00953998	0.0221097	Planctomycetota	Planctomycetes	Pirellulales	Pirellulaceae	Pirellula	ASV44	14 days vs 21 days
6.90861	6.35868	2.22268	2.86082	0.00422547	0.0165697	0.0392229	Planctomycetota	Planctomycetes	Pirellulales	Pirellulaceae	Pirellulaceae_unclassified	ASV630	14 days vs 21 days
5.32642	5.58973	1.89884	2.94376	0.00324249	0.0131379	0.0311751	Planctomycetota	Planctomycetes	Pirellulales	Pirellulaceae	Pirellulaceae_unclassified	ASV773	14 days vs 21 days
25.6386	-4.57679	1.12319	-4.0748	4.60529e-05	0.000315691	0.00076841	Planctomycetota	Planctomycetes	Planctomycetales	Schlesneriaceae	Planctopirus	ASV229	14 days vs 21 days
15.4724	-8.51533	2.82481	-3.01448	0.0025742	0.0109039	0.0257228	Planctomycetota	Planctomycetes	Planctomycetales	Schlesneriaceae	Planctopirus	ASV366	14 days vs 21 days
228.57	2.93983	0.895236	3.28386	0.00102397	0.00508025	0.0117188	Planctomycetota	Planctomycetes	Planctomycetales	Planctomycetales_insertae_sedis_family	Planctomycetales_insertae_sedis_genus	ASV15	14 days vs 21 days
6.13684	6.30252	1.54752	4.07267	4.64779e-05	0.00031619	0.000773092	Planctomycetota	Planctomycetes	Gemmatales	Gemmataceae	Gemmataceae_insertae_sedis_genus	ASV665	14 days vs 21 days
38.3222	2.40682	0.854151	2.8178	0.00483543	0.0183992	0.0438959	Planctomycetota	Planctomycetes	Gemmatales	Gemmataceae	Gemmataceae_insertae_sedis_genus	ASV148	14 days vs 21 days
29.4184	2.82367	0.801371	3.52355	0.000425808	0.00236034	0.00564511	Planctomycetota	Planctomycetes	Gemmatales	Gemmataceae	Gemmataceae_insertae_sedis_genus	ASV196	14 days vs 21 days
15.7891	3.70589	1.08523	3.41484	0.000638192	0.00334701	0.00789334	Planctomycetota	Planctomycetes	Gemmatales	Gemmataceae	Gemmataceae_unclassified	ASV360	14 days vs 21 days
11.2492	6.76782	2.12283	3.18811	0.00143207	0.00666323	0.0156216	Planctomycetota	Planctomycetes	Isosphaerales	Isosphaeraceae	Aquisphaera	ASV445	14 days vs 21 days
12.6327	6.94324	1.67199	4.15268	3.28606e-05	0.000232353	0.000567284	Acidobacteriota	Vicinamibacteria	Vicinamibacterales	Vicinamibacterales_insertae_sedis_family	Vicinamibacterales_insertae_sedis_genus	ASV416	14 days vs 21 days
27.387	5.24728	1.18149	4.44125	8.94397e-06	7.17115e-05	0.000176977	Acidobacteriota	Vicinamibacteria	Vicinamibacterales	Vicinamibacterales_insertae_sedis_family	Vicinamibacterales_insertae_sedis_genus	ASV213	14 days vs 21 days
80.3663	3.06471	0.764435	4.00912	6.09448e-05	0.000401819	0.000983193	Acidobacteriota	Vicinamibacteria	Vicinamibacterales	Vicinamibacteraceae	Vicinamibacteraceae_insertae_sedis_genus	ASV63	14 days vs 21 days
58.4231	3.93124	1.1962	3.28645	0.0010146	0.00508025	0.0116864	Acidobacteriota	Vicinamibacteria	Vicinamibacterales	Vicinamibacteraceae	Vicinamibacteraceae_insertae_sedis_genus	ASV97	14 days vs 21 days
60.2475	3.05518	1.07002	2.85527	0.00430009	0.016789	0.0397777	Acidobacteriota	Vicinamibacteria	Vicinamibacterales	Vicinamibacterales_insertae_sedis_family	Vicinamibacterales_insertae_sedis_genus	ASV90	14 days vs 21 days
49.0299	2.95951	0.974869	3.03581	0.00239894	0.010357	0.0241972	Verrucomicrobiota	Verrucomicrobiia	Pedosphaerales	Pedosphaeraceae	Oikopleura	ASV116	14 days vs 21 days
40.2992	6.9857	1.01898	6.85561	7.101e-12	1.7713e-10	4.45542e-10	Verrucomicrobiota	Verrucomicrobiia	Pedosphaerales	Pedosphaeraceae	Pedosphaeraceae_insertae_sedis_genus	ASV145	14 days vs 21 days
22.0659	7.89838	1.12365	7.02925	2.07646e-12	5.6505e-11	1.46336e-10	Verrucomicrobiota	Verrucomicrobiia	Pedosphaerales	Pedosphaeraceae	Pedosphaeraceae_insertae_sedis_genus	ASV275	14 days vs 21 days
38.0555	8.80491	1.07952	8.15631	3.45412e-16	1.5509e-14	4.51226e-14	Verrucomicrobiota	Verrucomicrobiia	Pedosphaerales	Pedosphaeraceae	Pedosphaeraceae_insertae_sedis_genus	ASV152	14 days vs 21 days
30.5087	-6.49698	1.28992	-5.03672	4.73571e-07	4.83258e-06	1.23729e-05	Verrucomicrobiota	Verrucomicrobiia	Chthoniobacterales	Terrimicrobiaceae	Terrimicrobium	ASV194	14 days vs 21 days
18.2712	-8.75077	2.74889	-3.18338	0.00145568	0.00673814	0.0158468	Verrucomicrobiota	Verrucomicrobiia	Chthoniobacterales	Terrimicrobiaceae	Terrimicrobium	ASV316	14 days vs 21 days
35.5002	3.43917	1.16302	2.95711	0.00310537	0.0126941	0.0301206	Verrucomicrobiota	Verrucomicrobiia	Chthoniobacterales	Terrimicrobiaceae	Terrimicrobium	ASV169	14 days vs 21 days
42.2744	-9.78735	2.1027	-4.65467	3.24504e-06	2.82917e-05	7.15245e-05	Verrucomicrobiota	Verrucomicrobiia	Chthoniobacterales	Terrimicrobiaceae	Terrimicrobium	ASV142	14 days vs 21 days
17.5699	-7.98118	1.74992	-4.56089	5.09372e-06	4.27492e-05	0.000107409	Verrucomicrobiota	Verrucomicrobiia	Chthoniobacterales	Terrimicrobiaceae	Terrimicrobium	ASV335	14 days vs 21 days
24.8095	-8.75992	1.71651	-5.10333	3.33731e-07	3.52577e-06	9.02759e-06	Verrucomicrobiota	Verrucomicrobiia	Chthoniobacterales	Terrimicrobiaceae	Terrimicrobium	ASV244	14 days vs 21 days
9.64864	4.29617	1.24732	3.44431	0.000572508	0.00306019	0.00721495	Verrucomicrobiota	Verrucomicrobiia	Chthoniobacterales	Chthoniobacterales_unclassified	Chthoniobacterales_unclassified	ASV512	14 days vs 21 days
10.2272	-6.92721	2.03209	-3.4089	0.000652247	0.00338565	0.00799413	Verrucomicrobiota	Verrucomicrobiia	Chthoniobacterales	Chthoniobacteraceae	Chthoniobacteraceae_unclassified	ASV449	14 days vs 21 days
5.57633	6.21383	1.83378	3.38853	0.000702681	0.00360576	0.00853414	Verrucomicrobiota	Verrucomicrobiia	Verrucomicrobiales	Verrucomicrobiaceae	Verrucomicrobiaceae_insertae_sedis_genus	ASV728	14 days vs 21 days
92.6362	-2.60133	0.825072	-3.15286	0.00161681	0.00737004	0.0172847	Verrucomicrobiota	Verrucomicrobiia	Verrucomicrobiales	Rubritaleaceae	Haloferula	ASV54	14 days vs 21 days
26.6702	7.8728	1.11316	7.07248	1.52184e-12	4.27067e-11	1.10149e-10	Verrucomicrobiota	Verrucomicrobiia	Verrucomicrobiales	Rubritaleaceae	Luteolibacter	ASV223	14 days vs 21 days
281.686	-2.82432	0.502254	-5.62328	1.87363e-08	2.4036e-07	6.39181e-07	Verrucomicrobiota	Verrucomicrobiia	Verrucomicrobiales	Rubritaleaceae	Luteolibacter	ASV10	14 days vs 21 days
23.4566	-8.63327	2.15279	-4.01026	6.06508e-05	0.000401819	0.000981408	Verrucomicrobiota	Verrucomicrobiia	Verrucomicrobiales	Rubritaleaceae	Luteolibacter	ASV249	14 days vs 21 days
9.36502	6.04833	2.15784	2.80296	0.00506364	0.0191863	0.0455048	Verrucomicrobiota	Verrucomicrobiia	Verrucomicrobiales	Rubritaleaceae	Luteolibacter	ASV544	14 days vs 21 days
38.3769	9.19982	1.57947	5.82464	5.72346e-09	8.56612e-08	2.22137e-07	Verrucomicrobiota	Verrucomicrobiia	Verrucomicrobiales	Rubritaleaceae	Luteolibacter	ASV143	14 days vs 21 days
49.2816	8.92518	1.06228	8.40189	4.39344e-17	2.19184e-15	6.03366e-15	Verrucomicrobiota	Verrucomicrobiia	Verrucomicrobiales	Rubritaleaceae	Luteolibacter	ASV120	14 days vs 21 days
146.283	10.0064	1.05317	9.50115	2.07595e-21	2.66315e-19	6.1771e-19	Verrucomicrobiota	Verrucomicrobiia	Verrucomicrobiales	Rubritaleaceae	Luteolibacter	ASV37	14 days vs 21 days
32.4864	-8.81379	1.77372	-4.96911	6.72625e-07	6.49481e-06	1.69135e-05	Verrucomicrobiota	Verrucomicrobiia	Verrucomicrobiales	Rubritaleaceae	Luteolibacter	ASV177	14 days vs 21 days
63.7851	-9.20097	1.51106	-6.08907	1.13572e-09	1.96129e-08	4.90556e-08	Verrucomicrobiota	Verrucomicrobiia	Verrucomicrobiales	Rubritaleaceae	Luteolibacter	ASV92	14 days vs 21 days
98.5599	-5.66716	1.82555	-3.10436	0.00190693	0.00851951	0.019832	Verrucomicrobiota	Verrucomicrobiia	Verrucomicrobiales	Rubritaleaceae	Luteolibacter	ASV50	14 days vs 21 days
77.6282	-10.174	1.08263	-9.39747	5.58909e-21	6.27376e-19	1.57554e-18	Verrucomicrobiota	Verrucomicrobiia	Verrucomicrobiales	Rubritaleaceae	Luteolibacter	ASV65	14 days vs 21 days
5.21613	5.92187	1.86598	3.1736	0.00150562	0.00690235	0.0162353	Verrucomicrobiota	Verrucomicrobiia	Verrucomicrobiales	Rubritaleaceae	Luteolibacter	ASV758	14 days vs 21 days
14.8222	7.64474	1.25862	6.07391	1.24833e-09	2.07593e-08	5.30639e-08	Verrucomicrobiota	Verrucomicrobiia	Verrucomicrobiales	DEV007	DEV007_insertae_sedis_genus	ASV369	14 days vs 21 days
22.2634	-8.2837	1.70899	-4.84712	1.25264e-06	1.18407e-05	3.02213e-05	Verrucomicrobiota	Verrucomicrobiia	Verrucomicrobiales	Verrucomicrobiaceae	Verrucomicrobium	ASV259	14 days vs 21 days
38.456	-8.72308	1.76225	-4.94998	7.42214e-07	7.09051e-06	1.84042e-05	Verrucomicrobiota	Verrucomicrobiia	Verrucomicrobiales	Verrucomicrobiaceae	Verrucomicrobium	ASV168	14 days vs 21 days
23.1188	-7.99067	1.42678	-5.60048	2.13759e-08	2.66605e-07	7.11114e-07	Verrucomicrobiota	Verrucomicrobiia	Verrucomicrobiales	Verrucomicrobiaceae	Phragmitibacter	ASV233	14 days vs 21 days
45.4285	2.45361	0.825239	2.97322	0.00294697	0.0121953	0.0288555	Verrucomicrobiota	Verrucomicrobiia	Verrucomicrobiales	Verrucomicrobiaceae	Roseimicrobium	ASV125	14 days vs 21 days
30.491	-9.54323	1.83519	-5.20014	1.99138e-07	2.15453e-06	5.54602e-06	Verrucomicrobiota	Verrucomicrobiia	Verrucomicrobiales	Verrucomicrobiaceae	Prosthecobacter	ASV187	14 days vs 21 days
11.5001	5.90702	2.09371	2.82132	0.00478262	0.0182757	0.0434902	Verrucomicrobiota	Verrucomicrobiia	Verrucomicrobiales	Verrucomicrobiaceae	Prosthecobacter	ASV476	14 days vs 21 days
119.744	-6.28579	1.42516	-4.41057	1.03097e-05	8.12116e-05	0.000200796	Verrucomicrobiota	Verrucomicrobiia	Verrucomicrobiales	Verrucomicrobiaceae	Prosthecobacter	ASV39	14 days vs 21 days
11.3069	6.7918	1.16798	5.815	6.06323e-09	8.82083e-08	2.3299e-07	Bdellovibrionota	Oligoflexia	0319-6G20	0319-6G20_insertae_sedis_family	0319-6G20_insertae_sedis_genus	ASV457	14 days vs 21 days
57.2913	4.53381	1.3049	3.47444	0.000511923	0.00276932	0.00649909	Myxococcota	Polyangiia	Polyangiales	BIrii41	BIrii41_insertae_sedis_genus	ASV106	14 days vs 21 days
24.7816	8.65891	2.85611	3.03171	0.0024317	0.0104482	0.0244816	Pseudomonadota	Gammaproteobacteria	Pseudomonadales	Moraxellaceae	Moraxellaceae_insertae_sedis_genus	ASV211	14 days vs 21 days
141.07	4.712	1.47758	3.189	0.00142768	0.00666323	0.0156054	Pseudomonadota	Gammaproteobacteria	Pseudomonadales	Moraxellaceae	Moraxellaceae_insertae_sedis_genus	ASV36	14 days vs 21 days
17.484	-8.18231	1.47928	-5.53129	3.17892e-08	3.80622e-07	1.01954e-06	Pseudomonadota	Gammaproteobacteria	Burkholderiales	Rhodocyclaceae	Rhodocyclaceae_unclassified	ASV290	14 days vs 21 days
30.4985	-8.31143	2.0449	-4.06447	4.81426e-05	0.000325053	0.000795838	Pseudomonadota	Gammaproteobacteria	Burkholderiales	Comamonadaceae	Comamonadaceae_unclassified	ASV182	14 days vs 21 days
10.0513	7.06034	1.69128	4.17455	2.98573e-05	0.000216224	0.0005226	Pseudomonadota	Gammaproteobacteria	Burkholderiales	Comamonadaceae	Comamonadaceae_unclassified	ASV483	14 days vs 21 days
97.2343	-10.7802	1.8452	-5.84229	5.14874e-09	7.83655e-08	2.01289e-07	Pseudomonadota	Gammaproteobacteria	Burkholderiales	Comamonadaceae	Hydrogenophaga	ASV48	14 days vs 21 days
25.0952	-8.70066	2.00569	-4.33798	1.43797e-05	0.000110367	0.000268354	Pseudomonadota	Gammaproteobacteria	Burkholderiales	Comamonadaceae	Hydrogenophaga	ASV209	14 days vs 21 days
13.5409	7.86482	2.03368	3.86727	0.000110059	0.000691139	0.00166313	Pseudomonadota	Gammaproteobacteria	Burkholderiales	Comamonadaceae	Comamonadaceae_unclassified	ASV382	14 days vs 21 days
30.2621	8.67582	1.07932	8.03824	9.11378e-16	3.89722e-14	1.16222e-13	Pseudomonadota	Gammaproteobacteria	Burkholderiales	Comamonadaceae	Comamonadaceae_unclassified	ASV190	14 days vs 21 days
146.134	11.0902	1.08158	10.2538	1.13798e-24	2.04382e-22	4.68849e-22	Pseudomonadota	Gammaproteobacteria	Burkholderiales	Rhodocyclaceae	Dechloromonas	ASV32	14 days vs 21 days
30.6057	8.12751	1.05869	7.67694	1.62937e-14	5.62761e-13	1.64659e-12	Pseudomonadota	Gammaproteobacteria	Burkholderiales	Burkholderiales_unclassified	Burkholderiales_unclassified	ASV195	14 days vs 21 days
111.814	2.76356	0.669669	4.12676	3.67905e-05	0.000258108	0.000627547	Pseudomonadota	Gammaproteobacteria	Burkholderiales	SC-I-84	SC-I-84_insertae_sedis_genus	ASV45	14 days vs 21 days
11.4208	7.55688	2.08862	3.61813	0.000296743	0.00166547	0.00405447	Pseudomonadota	Gammaproteobacteria	Burkholderiales	TRA3-20	TRA3-20_insertae_sedis_genus	ASV421	14 days vs 21 days
78.6579	-2.8345	0.488076	-5.80751	6.34102e-09	9.03847e-08	2.40869e-07	Pseudomonadota	Gammaproteobacteria	Burkholderiales	Alcaligenaceae	Achromobacter	ASV64	14 days vs 21 days
17.1507	-7.4478	1.48907	-5.00166	5.68389e-07	5.60894e-06	1.4566e-05	Pseudomonadota	Gammaproteobacteria	Burkholderiales	Chitinibacteraceae	Chitinibacteraceae_unclassified	ASV219	14 days vs 21 days
9.92605	-7.84007	2.10959	-3.71639	0.000202089	0.00119392	0.00287105	Pseudomonadota	Gammaproteobacteria	Burkholderiales	Chitinibacteraceae	Formivibrio	ASV472	14 days vs 21 days
13.9301	-6.2031	1.68168	-3.68864	0.000225455	0.00132326	0.00317773	Pseudomonadota	Gammaproteobacteria	Pseudomonadales	Moraxellaceae	Acinetobacter	ASV324	14 days vs 21 days
36.2545	8.11227	1.08567	7.47213	7.89091e-14	2.36201e-12	7.04395e-12	Pseudomonadota	Gammaproteobacteria	Pseudomonadales	Halieaceae	Kineobactrum	ASV172	14 days vs 21 days
90.104	3.10792	0.993187	3.12924	0.00175259	0.00794861	0.0184781	Pseudomonadota	Gammaproteobacteria	Pseudomonadales	Halieaceae	Kineobactrum	ASV60	14 days vs 21 days
13.5986	-8.11333	2.53045	-3.20628	0.00134463	0.00642277	0.0149416	Pseudomonadota	Gammaproteobacteria	Enterobacterales	Alteromonadaceae	Rheinheimera	ASV393	14 days vs 21 days
223.904	-4.18603	0.47479	-8.8166	1.17986e-18	7.0634e-17	2.03849e-16	Pseudomonadota	Gammaproteobacteria	Lysobacterales	Lysobacteraceae	Pseudoxanthomonas	ASV16	14 days vs 21 days
20.0442	-30.1254	2.86116	-10.5291	6.34561e-26	1.89945e-23	3.39871e-23	Pseudomonadota	Gammaproteobacteria	Lysobacterales	Lysobacteraceae	Pseudoxanthomonas	ASV287	14 days vs 21 days
9.85837	7.23517	2.55945	2.82684	0.00470093	0.0180403	0.042893	Pseudomonadota	Gammaproteobacteria	Lysobacterales	Lysobacteraceae	Pseudoxanthomonas	ASV489	14 days vs 21 days
27.1638	-8.14109	1.70132	-4.78515	1.70856e-06	1.54978e-05	3.97195e-05	Pseudomonadota	Gammaproteobacteria	Lysobacterales	Lysobacteraceae	Stenotrophomonas	ASV227	14 days vs 21 days
38.1008	-5.50992	1.47444	-3.73696	0.000186255	0.00111505	0.0026728	Pseudomonadota	Gammaproteobacteria	Pseudomonadales	Pseudomonadaceae	Pseudomonadaceae_unclassified	ASV138	14 days vs 21 days
93.0566	-2.76027	0.850854	-3.24411	0.00117816	0.00571887	0.0132847	Pseudomonadota	Gammaproteobacteria	Pseudomonadales	Pseudomonadaceae	Pseudomonas	ASV49	14 days vs 21 days
33.229	-7.57226	1.94739	-3.88842	0.0001009	0.00064177	0.00153966	Pseudomonadota	Gammaproteobacteria	Pseudomonadales	Pseudomonadaceae	Pseudomonadaceae_unclassified	ASV171	14 days vs 21 days
26.8372	-8.25093	1.48903	-5.54116	3.00479e-08	3.64635e-07	9.69496e-07	Pseudomonadota	Gammaproteobacteria	Pseudomonadales	Pseudomonadaceae	Pseudomonas	ASV167	14 days vs 21 days
23.0339	7.72733	2.05553	3.75929	0.000170393	0.00102693	0.00245329	Pseudomonadota	Gammaproteobacteria	Pseudomonadales	Pseudomonadaceae	Pseudomonas	ASV262	14 days vs 21 days
26.024	-6.86092	1.65201	-4.15306	3.28054e-05	0.000232353	0.000567284	Pseudomonadota	Gammaproteobacteria	Pseudomonadales	Pseudomonadaceae	Pseudomonas	ASV147	14 days vs 21 days
47.4241	-2.89586	0.999507	-2.89729	0.003764	0.0148902	0.0354808	Pseudomonadota	Gammaproteobacteria	Pseudomonadales	Pseudomonadaceae	Pseudomonas	ASV119	14 days vs 21 days
242.84	7.33529	1.1132	6.58936	4.41718e-11	9.44434e-10	2.34242e-09	Pseudomonadota	Gammaproteobacteria	Rickettsiellales	Rickettsiellaceae	Aquicella	ASV13	14 days vs 21 days
8.52047	6.80911	1.28838	5.28503	1.25687e-07	1.4287e-06	3.67859e-06	Pseudomonadota	Gammaproteobacteria	Pseudomonadales	Pseudomonadales_unclassified	Pseudomonadales_unclassified	ASV535	14 days vs 21 days
121.489	-2.63199	0.91236	-2.88481	0.00391644	0.0154253	0.0365292	Pseudomonadota	Gammaproteobacteria	Enterobacterales	Aeromonadaceae	Aeromonas	ASV17	14 days vs 21 days
27.2807	-6.87567	2.07777	-3.30916	0.000935751	0.00472081	0.0109865	Pseudomonadota	Gammaproteobacteria	Enterobacterales	Enterobacteriaceae	Enterobacteriaceae_unclassified	ASV124	14 days vs 21 days
237.09	-4.85617	0.835216	-5.81426	6.09011e-09	8.82083e-08	2.3299e-07	Pseudomonadota	Gammaproteobacteria	Enterobacterales	Enterobacteriaceae	Enterobacteriaceae_unclassified	ASV7	14 days vs 21 days
8.19188	-30.9576	4.65477	-6.65072	2.91661e-11	6.71568e-10	1.62722e-09	Pseudomonadota	Gammaproteobacteria	Pseudomonadales	Cellvibrionaceae	Cellvibrio	ASV503	14 days vs 21 days
931.575	-3.35722	0.591724	-5.67364	1.39798e-08	1.84616e-07	4.95761e-07	Pseudomonadota	Gammaproteobacteria	Pseudomonadales	Cellvibrionaceae	Cellvibrio	ASV1	14 days vs 21 days
42.2977	3.16721	1.01315	3.12609	0.00177145	0.00799378	0.0186403	Pseudomonadota	Gammaproteobacteria	Steroidobacterales	Steroidobacteraceae	Steroidobacter	ASV136	14 days vs 21 days
36.5602	3.10369	0.851162	3.64642	0.000265922	0.00154063	0.00368984	Pseudomonadota	Gammaproteobacteria	PLTA13	PLTA13_insertae_sedis_family	PLTA13_insertae_sedis_genus	ASV159	14 days vs 21 days
13.2155	4.53475	1.24489	3.64269	0.000269803	0.0015434	0.00371528	Pseudomonadota	Gammaproteobacteria	R7C24	R7C24_insertae_sedis_family	R7C24_insertae_sedis_genus	ASV398	14 days vs 21 days
57.3112	2.89292	0.823918	3.51118	0.000446124	0.0024428	0.00585647	Pseudomonadota	Gammaproteobacteria	CCM19a	CCM19a_insertae_sedis_family	CCM19a_insertae_sedis_genus	ASV101	14 days vs 21 days
29.4066	4.95187	1.28424	3.85588	0.000115313	0.000714147	0.00172157	Pseudomonadota	Gammaproteobacteria	Gammaproteobacteria_unclassified	Gammaproteobacteria_unclassified	Gammaproteobacteria_unclassified	ASV192	14 days vs 21 days
19.7274	4.24649	1.32857	3.19628	0.00139212	0.0065796	0.0153105	Pseudomonadota	Gammaproteobacteria	Gammaproteobacteria_unclassified	Gammaproteobacteria_unclassified	Gammaproteobacteria_unclassified	ASV296	14 days vs 21 days
15.6062	7.42239	1.67006	4.44438	8.81453e-06	7.13104e-05	0.000176159	Pseudomonadota	Alphaproteobacteria	Reyranellales	Reyranellaceae	Reyranella	ASV372	14 days vs 21 days
6.4734	5.55985	1.81665	3.0605	0.00220968	0.00967947	0.0225001	Bdellovibrionota	Bdellovibrionia	Bdellovibrionales	Pseudobdellovibrionaceae	Pseudobdellovibrionaceae_insertae_sedis_genus	ASV705	14 days vs 21 days
5.56319	-5.62023	1.92001	-2.92719	0.00342039	0.0136512	0.0325393	Bdellovibrionota	Bdellovibrionia	Bdellovibrionales	Pseudobdellovibrionaceae	Bdellovibrio	ASV700	14 days vs 21 days
190.523	-10.3868	1.12301	-9.24902	2.26558e-20	1.84954e-18	5.51566e-18	Pseudomonadota	Alphaproteobacteria	Caulobacterales	Caulobacteraceae	Brevundimonas	ASV22	14 days vs 21 days
9.8741	-7.17078	2.58812	-2.77065	0.00559441	0.0208456	0.049445	Pseudomonadota	Alphaproteobacteria	Caulobacterales	Caulobacteraceae	Caulobacteraceae_unclassified	ASV450	14 days vs 21 days
16.5131	-8.1662	1.7112	-4.77221	1.82218e-06	1.63631e-05	4.18866e-05	Pseudomonadota	Alphaproteobacteria	Caulobacterales	Caulobacteraceae	Asticcacaulis	ASV347	14 days vs 21 days
25.507	-7.76738	1.85117	-4.19594	2.7174e-05	0.000198393	0.000481934	Pseudomonadota	Alphaproteobacteria	Hyphomicrobiales	Rhizobiaceae	Agrobacterium	ASV226	14 days vs 21 days
51.0248	-8.74655	1.56694	-5.58194	2.37844e-08	2.92581e-07	7.79372e-07	Pseudomonadota	Alphaproteobacteria	Hyphomicrobiales	Rhizobiaceae	Agrobacterium	ASV111	14 days vs 21 days
171.303	-4.66044	0.995816	-4.68002	2.8685e-06	2.5254e-05	6.42832e-05	Pseudomonadota	Alphaproteobacteria	Hyphomicrobiales	Rhizobiaceae	Rhizobiaceae_unclassified	ASV26	14 days vs 21 days
14.0908	-6.96518	1.78451	-3.90313	9.49559e-05	0.000609074	0.0014531	Pseudomonadota	Alphaproteobacteria	Hyphomicrobiales	Rhizobiaceae	Endobacterium	ASV383	14 days vs 21 days
7.25708	-6.57637	2.23439	-2.94325	0.0032479	0.0131379	0.0311751	Pseudomonadota	Alphaproteobacteria	Hyphomicrobiales	Rhizobiaceae	Rhizobiaceae_unclassified	ASV600	14 days vs 21 days
22.5977	-7.99823	2.4998	-3.19955	0.00137642	0.00653982	0.015169	Pseudomonadota	Alphaproteobacteria	Hyphomicrobiales	Rhizobiaceae	Rhizobiaceae_unclassified	ASV253	14 days vs 21 days
9.86693	-7.11094	1.80365	-3.94252	8.06297e-05	0.000520903	0.00126273	Pseudomonadota	Alphaproteobacteria	Hyphomicrobiales	Rhizobiaceae	Shinella	ASV495	14 days vs 21 days
12.665	-7.98621	1.70462	-4.68505	2.79892e-06	2.48855e-05	6.29875e-05	Pseudomonadota	Alphaproteobacteria	Hyphomicrobiales	Rhizobiaceae	Rhizobiaceae_unclassified	ASV407	14 days vs 21 days
23.9461	-2.9687	0.999829	-2.96921	0.00298569	0.0122989	0.0291813	Pseudomonadota	Alphaproteobacteria	Hyphomicrobiales	Rhizobiaceae	Pararhizobium	ASV270	14 days vs 21 days
8.59827	-6.62336	2.19654	-3.01536	0.00256675	0.0109039	0.0256963	Pseudomonadota	Alphaproteobacteria	Sphingomonadales	Sphingomonadaceae	Sphingomonas	ASV533	14 days vs 21 days
44.2762	-2.79672	0.62412	-4.48106	7.42728e-06	6.11899e-05	0.000150684	Pseudomonadota	Alphaproteobacteria	Sphingomonadales	Sphingomonadaceae	Sphingopyxis	ASV130	14 days vs 21 days
14.893	-7.93809	1.23239	-6.4412	1.18532e-10	2.31395e-09	5.71943e-09	Pseudomonadota	Alphaproteobacteria	Sphingomonadales	Sphingomonadaceae	Sphingomonadaceae_unclassified	ASV376	14 days vs 21 days
29.003	1.3443	0.483833	2.77844	0.00546202	0.0204371	0.0483547	Pseudomonadota	Alphaproteobacteria	Hyphomicrobiales	Rhizobiaceae	Rhizobiaceae_unclassified	ASV205	14 days vs 21 days
18.5853	-5.39819	1.85332	-2.91272	0.00358297	0.0142368	0.0339053	Pseudomonadota	Alphaproteobacteria	Hyphomicrobiales	Kaistiaceae	Kaistia	ASV327	14 days vs 21 days
66.3486	-3.12442	0.644924	-4.84463	1.26849e-06	1.18657e-05	3.04666e-05	Pseudomonadota	Alphaproteobacteria	Hyphomicrobiales	Devosiaceae	Devosia	ASV83	14 days vs 21 days
35.2811	-9.28419	1.39753	-6.6433	3.06728e-11	6.88603e-10	1.69364e-09	Pseudomonadota	Alphaproteobacteria	Hyphomicrobiales	Devosiaceae	Devosia	ASV175	14 days vs 21 days
53.4376	-6.19341	1.2422	-4.98586	6.16878e-07	6.02127e-06	1.57333e-05	Pseudomonadota	Alphaproteobacteria	Hyphomicrobiales	Devosiaceae	Devosiaceae_unclassified	ASV105	14 days vs 21 days
41.7609	-9.0217	1.163	-7.75725	8.67875e-15	3.38849e-13	9.48641e-13	Pseudomonadota	Alphaproteobacteria	Hyphomicrobiales	Devosiaceae	Devosia	ASV140	14 days vs 21 days
21.4303	-4.00748	1.25556	-3.19178	0.001414	0.00664804	0.0154875	Pseudomonadota	Alphaproteobacteria	Hyphomicrobiales	Devosiaceae	Devosia	ASV298	14 days vs 21 days
47.5572	-2.48104	0.726808	-3.41361	0.000641076	0.00334701	0.00789334	Pseudomonadota	Alphaproteobacteria	Hyphomicrobiales	Devosiaceae	Devosia	ASV121	14 days vs 21 days
122.564	-10.3489	1.0372	-9.97778	1.90691e-23	2.85401e-21	7.2953e-21	Pseudomonadota	Alphaproteobacteria	Hyphomicrobiales	Devosiaceae	Devosia	ASV41	14 days vs 21 days
26.986	8.444	1.06336	7.94084	2.00817e-15	8.19699e-14	2.39017e-13	Pseudomonadota	Alphaproteobacteria	Hyphomicrobiales	Xanthobacteraceae	Pseudolabrys	ASV218	14 days vs 21 days
13.7061	7.37345	1.66564	4.42681	9.56376e-06	7.60023e-05	0.000186947	Pseudomonadota	Alphaproteobacteria	Hyphomicrobiales	Xanthobacteraceae	Pseudolabrys	ASV386	14 days vs 21 days
11.9527	7.43417	1.23947	5.99787	1.99918e-09	3.20583e-08	8.30049e-08	Pseudomonadota	Alphaproteobacteria	Hyphomicrobiales	Xanthobacteraceae	Pseudorhodoplanes	ASV419	14 days vs 21 days
15.3012	7.3271	1.12854	6.49255	8.43969e-11	1.68419e-09	4.22458e-09	Pseudomonadota	Alphaproteobacteria	Hyphomicrobiales	Xanthobacteraceae	Xanthobacteraceae_unclassified	ASV373	14 days vs 21 days
20.4934	8.31287	1.60802	5.16964	2.34546e-07	2.50741e-06	6.40933e-06	Pseudomonadota	Alphaproteobacteria	Rhodobacterales	Paracoccaceae	Paracoccaceae_unclassified	ASV279	14 days vs 21 days
15.5845	7.79169	1.62495	4.79504	1.62641e-06	1.49032e-05	3.80395e-05	Pseudomonadota	Alphaproteobacteria	Rhodobacterales	Paracoccaceae	Fuscovulum	ASV354	14 days vs 21 days
37.7501	-5.14554	1.4852	-3.46453	0.000531156	0.00285616	0.00672547	Pseudomonadota	Alphaproteobacteria	Rhodobacterales	Paracoccaceae	Fuscovulum	ASV158	14 days vs 21 days
16.7444	-5.83007	1.91868	-3.03858	0.00237699	0.0103118	0.0240211	Pseudomonadota	Alphaproteobacteria	Rhodobacterales	Paracoccaceae	Paracoccaceae_unclassified	ASV334	14 days vs 21 days
23.6691	-7.92812	1.27171	-6.2342	4.54098e-10	8.15561e-09	2.06114e-08	Pseudomonadota	Alphaproteobacteria	Rhodobacterales	Paracoccaceae	Pseudorhodobacter	ASV202	14 days vs 21 days
76.1683	2.02531	0.679776	2.97938	0.00288831	0.0120637	0.0284371	Pseudomonadota	Alphaproteobacteria	Rhodobacterales	Paracoccaceae	Paracoccaceae_unclassified	ASV69	14 days vs 21 days
6.7713	-6.61432	2.22401	-2.97405	0.00293898	0.0121953	0.0288555	Pseudomonadota	Alphaproteobacteria	Rhodobacterales	Paracoccaceae	Paracoccaceae_unclassified	ASV620	14 days vs 21 days
10.0837	6.93046	1.32852	5.2167	1.8214e-07	2.00287e-06	5.21043e-06	Pseudomonadota	Alphaproteobacteria	Acetobacterales	Acetobacteraceae	Roseomonas	ASV497	14 days vs 21 days
6.99782	6.73239	1.74752	3.85253	0.000116904	0.000719037	0.00173927	Fibrobacterota	Fibrobacteria	Fibrobacterales	Fibrobacteraceae	possible_genus_04	ASV603	14 days vs 21 days
14.0176	-8.46813	2.60905	-3.24567	0.00117174	0.00571861	0.0132402	Campylobacterota	Campylobacteria	Campylobacterales	Arcobacteraceae	Arcobacter	ASV400	14 days vs 21 days
67.8232	4.11042	1.01941	4.03217	5.52635e-05	0.000370348	0.000902412	Bdellovibrionota	Oligoflexia	Oligoflexales	Oligoflexaceae	Oligoflexus	ASV75	14 days vs 21 days
5.7693	6.21497	1.41171	4.40243	1.07045e-05	8.35882e-05	0.000206235	Bdellovibrionota	Oligoflexia	Oligoflexales	Oligoflexaceae	Oligoflexaceae_insertae_sedis_genus	ASV716	14 days vs 21 days
22.1263	5.97527	1.02047	5.85539	4.75888e-09	7.36806e-08	1.87416e-07	Chloroflexota	OLB14	OLB14_insertae_sedis_order	OLB14_insertae_sedis_family	OLB14_insertae_sedis_genus	ASV263	14 days vs 21 days
6.10172	6.32792	1.39677	4.53039	5.88738e-06	4.89524e-05	0.00012222	Chloroflexota	Anaerolineae	Anaerolineales	Anaerolineaceae	Anaerolinea	ASV685	14 days vs 21 days
13.4797	4.05771	0.876805	4.62784	3.69503e-06	3.16013e-05	7.98008e-05	Chloroflexota	Anaerolineae	Aggregatilineales	A4b	OLB15	ASV402	14 days vs 21 days
9.65085	6.82091	1.81405	3.76005	0.000169877	0.00102693	0.00245246	Actinomycetota	Acidimicrobiia	Microtrichales	Microtrichales_insertae_sedis_family	Microtrichales_insertae_sedis_genus	ASV532	14 days vs 21 days
13.0936	-7.73112	1.60113	-4.82855	1.37529e-06	1.27321e-05	3.27381e-05	Actinomycetota	Actinobacteria	Micrococcales	Cellulomonadaceae	Actinotalea	ASV394	14 days vs 21 days
23.888	8.3892	2.47859	3.38467	0.000712645	0.00361557	0.00861609	Actinomycetota	Actinobacteria	Micrococcales	Microbacteriaceae	Microbacteriaceae_unclassified	ASV256	14 days vs 21 days
17.7548	-8.29573	2.28922	-3.62383	0.000290274	0.00163941	0.00397623	Actinomycetota	Actinobacteria	Micrococcales	Microbacteriaceae	Microbacteriaceae_unclassified	ASV337	14 days vs 21 days
32.2015	3.18739	0.765362	4.16455	3.11972e-05	0.00022412	0.000542507	Actinomycetota	Thermoleophilia	Solirubrobacterales	67-14	67-14_insertae_sedis_genus	ASV185	14 days vs 21 days
9.59835	7.19386	2.1129	3.40474	0.000662272	0.00341793	0.00806166	Gemmatimonadota	Gemmatimonadia	Gemmatimonadales	Gemmatimonadaceae	Gemmatimonas	ASV487	14 days vs 21 days
5.65312	6.29002	1.80383	3.48704	0.000488396	0.00265806	0.00625801	Gemmatimonadota	Gemmatimonadia	Gemmatimonadales	Gemmatimonadaceae	Gemmatimonadaceae_insertae_sedis_genus	ASV723	14 days vs 21 days
19.7495	4.47576	1.02416	4.37019	1.24141e-05	9.6102e-05	0.000235779	Gemmatimonadota	Gemmatimonadia	Gemmatimonadales	Gemmatimonadaceae	Gemmatimonadaceae_insertae_sedis_genus	ASV299	14 days vs 21 days
18.7054	3.36718	1.14801	2.93305	0.0033565	0.013456	0.0320453	Gemmatimonadota	Gemmatimonadia	Gemmatimonadales	Gemmatimonadaceae	Gemmatimonadaceae_insertae_sedis_genus	ASV329	14 days vs 21 days
6.21086	6.14197	1.42469	4.3111	1.62448e-05	0.000122587	0.000297969	Dependentiae	Babeliae	Babeliales	Vermiphilaceae	Vermiphilaceae_insertae_sedis_genus	ASV694	14 days vs 21 days
7.14672	6.36394	1.80761	3.52063	0.000430518	0.00237181	0.00569347	Patescibacteria	Saccharimonadia	Saccharimonadales	Saccharimonadales_unclassified	Saccharimonadales_unclassified	ASV604	14 days vs 21 days
65.9316	-10.7054	1.87928	-5.69652	1.22277e-08	1.6893e-07	4.51665e-07	Bacillota	Clostridia	Peptostreptococcales-Tissierellales	Fusibacteraceae	Fusibacter	ASV85	14 days vs 21 days
30.7204	-4.8547	1.71274	-2.83447	0.00459017	0.0176909	0.0419538	Bacillota	Bacilli	Exiguobacterales	Exiguobacteraceae	Exiguobacterium	ASV95	14 days vs 21 days
88.8344	-10.9039	1.2994	-8.39153	4.79863e-17	2.26799e-15	6.42537e-15	Abditibacteriota	Abditibacteriia	Abditibacteriales	Abditibacteriaceae	Abditibacterium	ASV58	14 days vs 21 days
5.49983	5.68017	1.84137	3.08475	0.00203722	0.00901193	0.0209431	Patescibacteria	Parcubacteria	Parcubacteria_unclassified	Parcubacteria_unclassified	Parcubacteria_unclassified	ASV741	14 days vs 21 days
6.89637	6.47052	1.77632	3.64266	0.000269837	0.0015434	0.00371528	Patescibacteria	Microgenomatia	Microgenomatia_insertae_sedis_order	Microgenomatia_insertae_sedis_family	Microgenomatia_insertae_sedis_genus	ASV619	14 days vs 21 days
8.43725	3.8402	1.3078	2.93638	0.00332066	0.013372	0.0318166	Acidobacteriota	Acidobacteriae	Bryobacterales	Bryobacteraceae	Bryobacter	ASV558	14 days vs 21 days
91.3202	1.68547	0.525059	3.21005	0.00132713	0.00637308	0.0148086	Acidobacteriota	Acidobacteriae	Bryobacterales	Bryobacteraceae	Bryobacteraceae_unclassified	ASV56	14 days vs 21 days
30.7615	3.81884	1.16417	3.28031	0.00103695	0.00511636	0.0118168	Acidobacteriota	Acidobacteriae	Bryobacterales	Bryobacteraceae	Paludibaculum	ASV184	14 days vs 21 days
44.7667	3.74131	1.17895	3.17342	0.00150653	0.00690235	0.0162353	Acidobacteriota	Acidobacteriae	Bryobacterales	Bryobacteraceae	Paludibaculum	ASV127	14 days vs 21 days
66.0959	3.32171	0.459391	7.23068	4.8057e-13	1.3921e-11	3.8999e-11	Nitrospirota	Nitrospiria	Nitrospirales	Nitrospiraceae	Nitrospira	ASV81	14 days vs 21 days
22.0342	3.48454	1.16546	2.98983	0.0027913	0.011768	0.0276344	Nitrospirota	Nitrospiria	Nitrospirales	Nitrospiraceae	Nitrospira	ASV271	14 days vs 21 days
141.895	4.34904	0.941681	4.61838	3.86753e-06	3.27646e-05	8.2858e-05	Acidobacteriota	Blastocatellia	Blastocatellales	Blastocatellaceae	Blastocatellaceae_insertae_sedis_genus	ASV34	14 days vs 21 days
19.8322	22.5393	2.57611	8.74934	2.14608e-18	2.87359e-15	3.48315e-16	Bacteroidota	Bacteroidia	Bacteroidales	Bacteroidaceae	Bacteroides	ASV289	21 days vs 28 days
22.3591	6.54292	1.86386	3.51041	0.000447417	0.0998486	0.00585909	Bacteroidota	Bacteroidia	Chitinophagales	Chitinophagaceae	Agriterribacter	ASV272	21 days vs 28 days
172.747	1.38154	0.466432	2.96193	0.00305714	0.409352	0.0297325	Bacteroidota	Bacteroidia	Chitinophagales	Chitinophagaceae	Flavihumibacter	ASV25	21 days vs 28 days
194.541	3.68889	0.912079	4.04449	5.24372e-05	0.0175533	0.000861514	Bacteroidota	Bacteroidia	Flavobacteriales	Flavobacteriaceae	Flavobacterium	ASV24	21 days vs 28 days
58.4463	6.40459	1.77819	3.60174	0.000316094	0.08465	0.00430789	Bacteroidota	Bacteroidia	Flavobacteriales	Flavobacteriaceae	Mariniflexile	ASV89	21 days vs 28 days
38.0955	6.92736	1.69149	4.09541	4.21419e-05	0.0175533	0.000712025	Bacteroidota	Bacteroidia	Flavobacteriales	Flavobacteriaceae	Mariniflexile	ASV151	21 days vs 28 days
21.4495	7.42381	1.75855	4.22155	2.4263e-05	0.0162441	0.000434193	Bacteroidota	Bacteroidia	Flavobacteriales	Flavobacteriaceae	Arenibacter	ASV276	21 days vs 28 days
69.2518	-5.6833	1.8011	-3.15547	0.00160239	0.268201	0.0171648	Verrucomicrobiota	Verrucomicrobiia	Verrucomicrobiales	Rubritaleaceae	Luteolibacter	ASV79	21 days vs 28 days
30.4985	5.71546	2.05603	2.77985	0.00543835	0.60683	0.0482249	Pseudomonadota	Gammaproteobacteria	Burkholderiales	Comamonadaceae	Comamonadaceae_unclassified	ASV182	21 days vs 28 days
223.904	1.48916	0.481677	3.09162	0.00199069	0.29617	0.020623	Pseudomonadota	Gammaproteobacteria	Lysobacterales	Lysobacteraceae	Pseudoxanthomonas	ASV16	21 days vs 28 days
25.507	5.94305	1.86036	3.19457	0.00140039	0.267875	0.0153698	Pseudomonadota	Alphaproteobacteria	Hyphomicrobiales	Rhizobiaceae	Agrobacterium	ASV226	21 days vs 28 days
23.9461	2.86631	1.00076	2.86413	0.00418152	0.509005	0.0388823	Pseudomonadota	Alphaproteobacteria	Hyphomicrobiales	Rhizobiaceae	Pararhizobium	ASV270	21 days vs 28 days
